# Supplementary material
Source: Elsevier journal article supplement (https://rcastoragev2.blob.core.windows.net/1e27416d41dddcaba7456d9cd4126333/mmc1.pdf)

**Cell Chemical Biology, Volume 28**

## **Supplemental information**

### **Development and pre-clinical testing**

#### **of a novel hypoxia-activated KDAC inhibitor**

**Anna Skwarska, Ewen D.D. Calder, Deborah Sneddon, Hannah Bolland, Maria L. Odyniec, Ishna N. Mistry, Jennifer Martin, Lisa K. Folkes, Stuart J. Conway, and Ester M. Hammond**

## Development and pre-clinical testing of a novel hypoxia-activated KDAC inhibitor

Anna Skwarska<sup>§2</sup>, Ewen D. D. Calder<sup>§1</sup>, Deborah Sneddon<sup>1</sup>, Hannah Bolland<sup>2</sup>, Maria L. Odyniec<sup>1</sup>, Ishna N. Mistry<sup>2</sup>, Jennifer Martin<sup>2</sup>, Lisa K. Folkes<sup>2</sup>, Stuart J. Conway<sup>\*1</sup> and Ester M. Hammond<sup>\*2</sup>

<sup>1</sup>Department of Chemistry, Chemistry Research Laboratory, University of Oxford, Mansfield Road, Oxford, OX1 3TA, UK.

<sup>2</sup>Oxford Institute for Radiation Oncology, Department of Oncology, University of Oxford, Old Road Campus Research Building, Oxford, OX3 7DQ, UK.

<sup>§</sup>equal contributions

<sup>\*</sup>corresponding authors

### Contents

|                       |     |
|-----------------------|-----|
| Supplementary Figures | S2  |
| Supplementary Schemes | S8  |
| Data S1 NMR Spectra   | S10 |
| Data S2 HPLC Traces   | S70 |

## SUPPLEMENTARY FIGURES

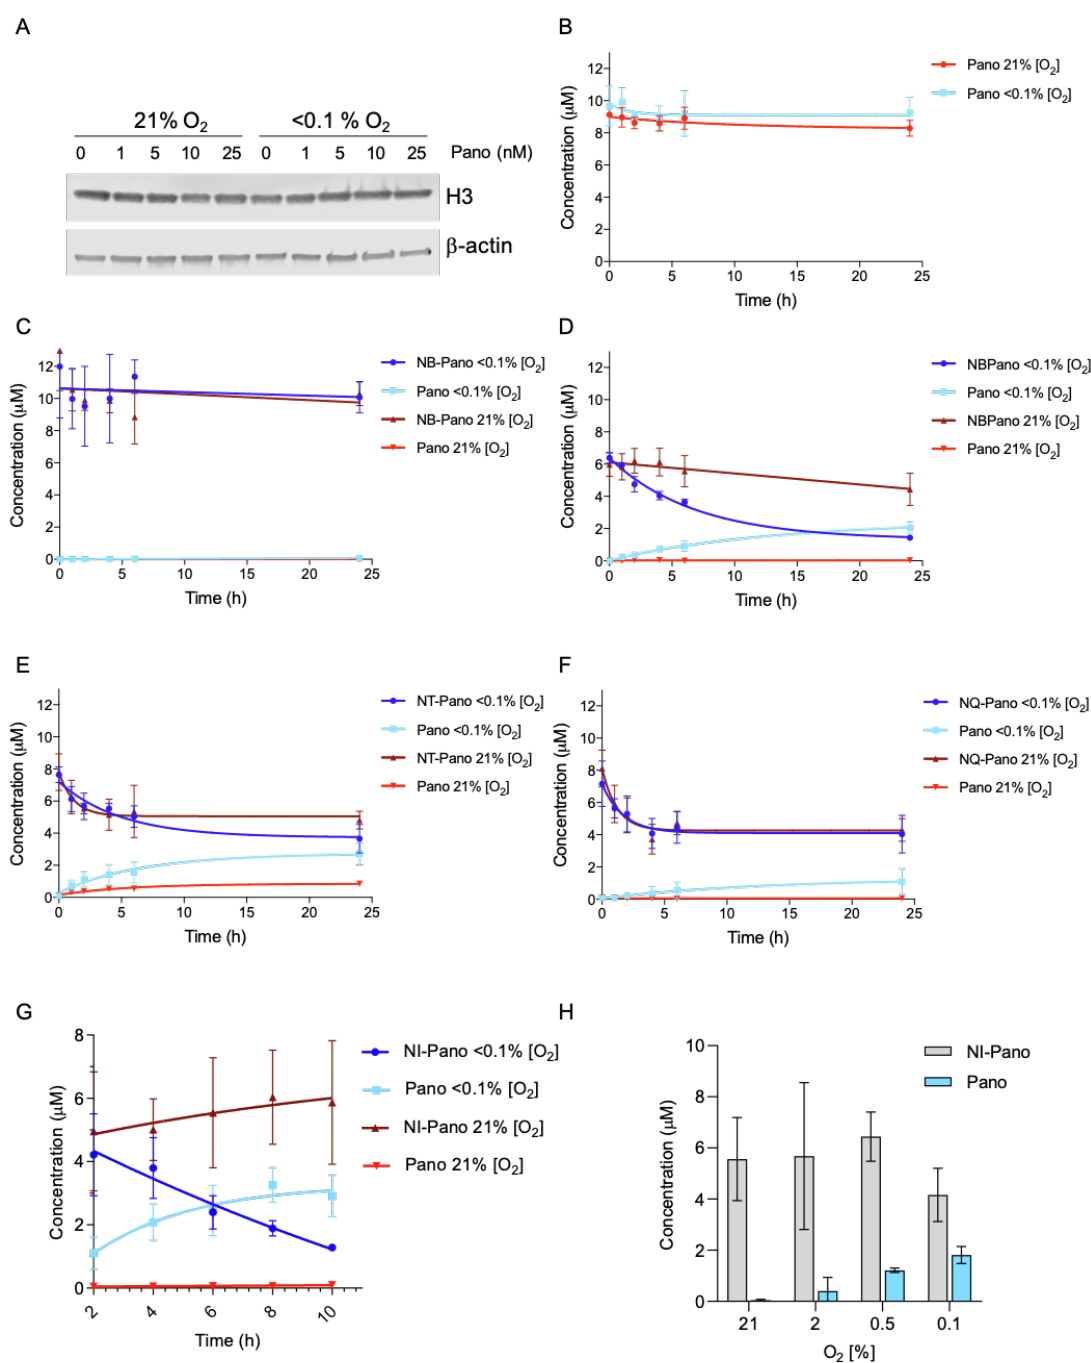

**Figure S1. Oxygen dependent reduction and fragmentation of HAPs of panobinostat, related to figure 2.** **A.** H3 and  $\beta$ -actin blots corresponding to the H3K18Ac shown in figure 2A. **B.** panobinostat (10  $\mu$ M), **C.** NB-Pano (10  $\mu$ M), **D.** NB-Pano at 92 pmol CYP004, **E.** NT-Pano (10  $\mu$ M) and **F.** NQ-Pano (10  $\mu$ M) were incubated with 9.2 pmol/mL of bacterial NADPH-CYP reductase (CYP004) in normoxic (21% O<sub>2</sub>) or hypoxic (<0.1% O<sub>2</sub>) conditions for 0-24 h and analyzed using LCMS. **G.** OE21 cells were treated with NI-Pano (10  $\mu$ M) in either normoxia or hypoxia (<0.1% O<sub>2</sub>) for the indicated times and the reduction of NI-Pano to Pano was determined by LCMS. **H.** OE21 cells were treated with NI-Pano (10  $\mu$ M) for 6 h at different oxygen concentrations and analyzed by LCMS. Data are mean  $\pm$  SD,  $n=3$ , except **B** where  $n=2$ .

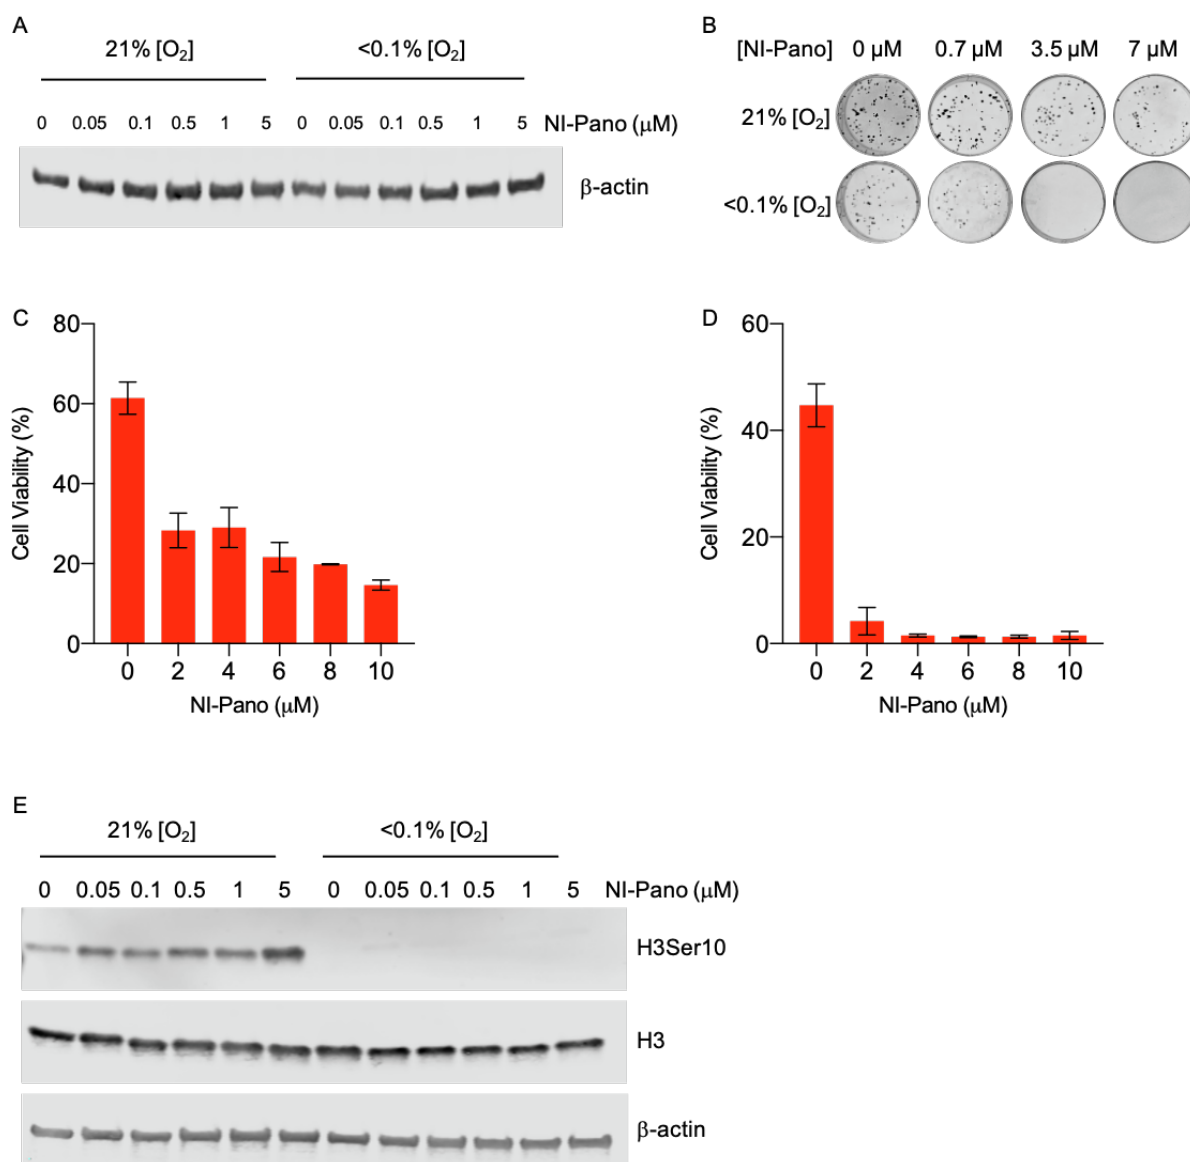

**Figure S2. NI-pano decreases cancer cell survival in hypoxia, related to figure 3.** **A.** Additional loading control for western blots shown in Fig. 2A. **B.** HCT116 cells were treated with NI-pano (0-7 μM) for 24 h at the oxygen concentration shown. NI-Pano was removed and cells allowed to form colonies in normoxic conditions. Representative images from figure 3D are shown. **C, D.** OE21 cells were treated with 0, 2, 4, 6, 8 or 10 μM of NI-Pano for 24 or 48 hours and exposed to <0.1% O<sub>2</sub>. Percentage cell viability was assessed using MTT assay. **E.** OE21 cells were treated with indicated concentrations of NI-Pano and exposed to normoxia or hypoxia (<0.1% O<sub>2</sub>) for 24 hours. Samples were probed for the phosphorylation of H3Ser10, total H3 and β-actin.



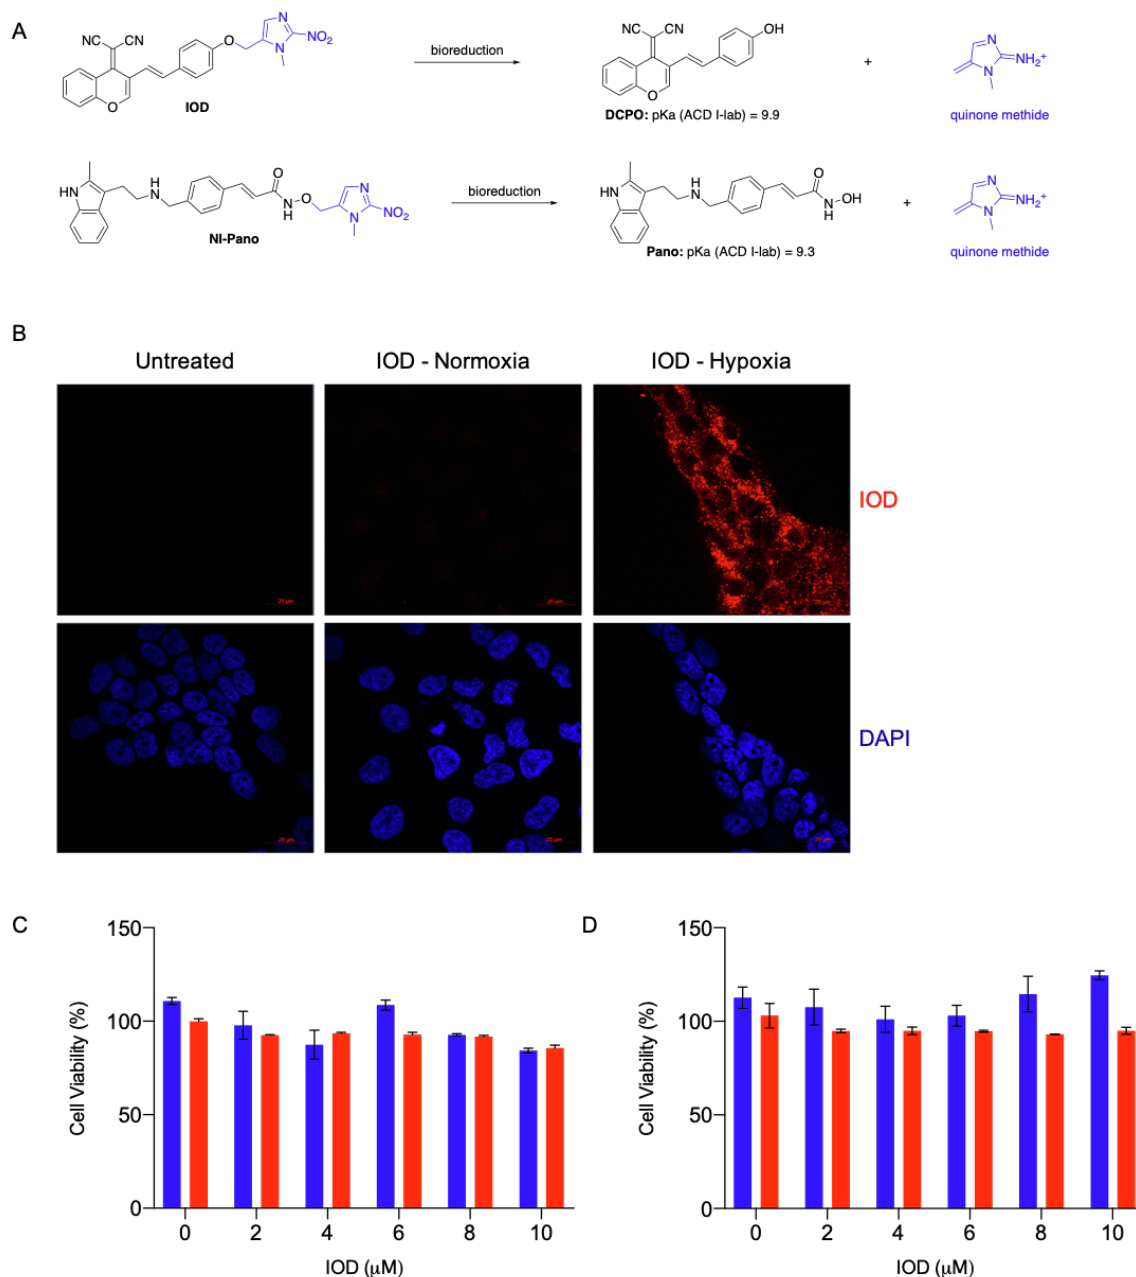

**Figure S3. IOD treatment is not toxic, related to figure 2. A.** A scheme showing the bioreductions of IOD and NI-Pano, which both result in the production of the same quinone-methide-like by-product. **B.** OE21 cells were treated with 10  $\mu\text{M}$  of IOD and exposed to  $<0.1\%$  O<sub>2</sub> for 16 hours. DAPI (DNA binding) was used to visualize the nucleus. Cells were fixed and imaged on a Zeiss LSM 780 confocal microscope. Images were taken at 63x magnification. Scale bar represents 20  $\mu\text{m}$ . **C.** OE21 cells were treated with indicated concentrations of IOD for 24 hours and exposed to either 21% O<sub>2</sub> (blue) or  $<0.1\%$  O<sub>2</sub> (red). Cell viability was measured using an MTT assay. 21% O<sub>2</sub> and  $<0.1\%$  O<sub>2</sub> data are normalized to the respective 0  $\mu\text{M}$  controls. **D.** OE21 cells were treated with indicated concentrations of IOD for 72 hours and exposed to either 21% O<sub>2</sub> or  $<0.1\%$  O<sub>2</sub>. Cell viability was measured using an MTT assay. 21% O<sub>2</sub> and  $<0.1\%$  O<sub>2</sub> data are normalized to the respective 0  $\mu\text{M}$  controls.

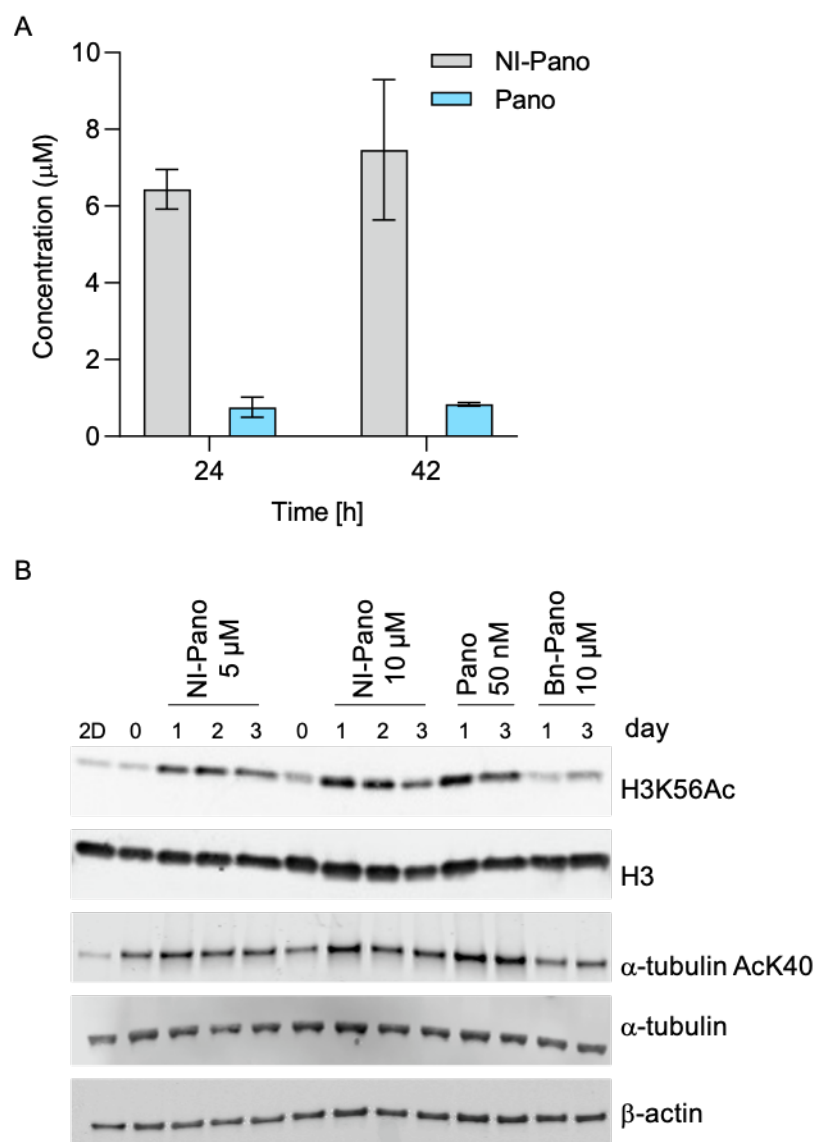

**Figure S4. NI-Pano is reduced in cancer cell spheroids, related to figure 4.** **A.** HCT116 cell spheroids were treated with NI-Pano (10  $\mu$ M) for the times indicated and the reduction of NI-Pano to Pano was determined by HPLC. At least 24 spheroids were analyzed per treatment condition. Data are mean  $\pm$  SD,  $n=3$ . **B.** Western blotting was carried out on the spheroid samples described in Fig. 4D using the antibodies indicated.

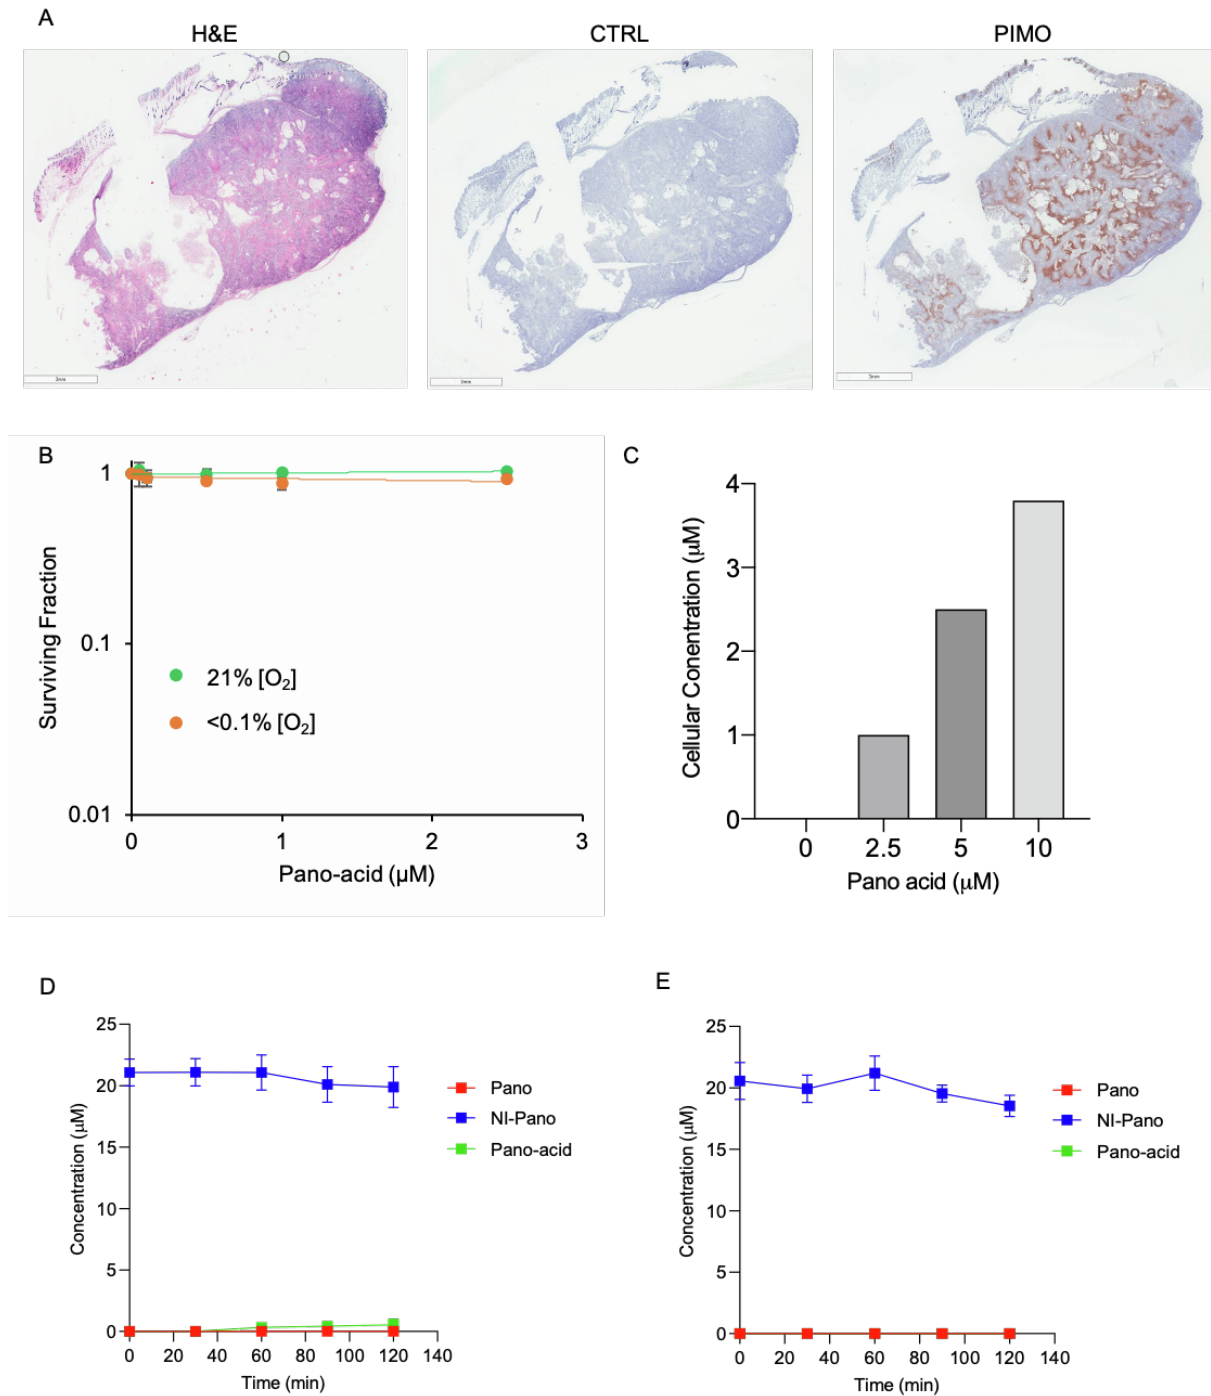

**Figure S5. *In vivo* testing of NI-Pano, related to figure 5. A.** OE21 xenograft tumors were stained with anti-pimonidazole antibody (PIMO) to visualize hypoxic regions and counterstained with hematoxylin and eosin (H&E). Anti-mouse secondary antibody alone was used as a negative control (CTRL). **B.** OE21 cells were treated with Pano-acid (0-2.5 μM) for 24 h at the oxygen concentrations shown. The Pano-acid was removed (media change) and cells allowed to form colonies in normoxic conditions. **C.** OE21 cells were treated with indicated doses of Pano-acid for 6 hours under normoxic conditions. Cells were collected and resulting supernatant analyzed by HPLC **D.** Plasma from healthy rats or **E.** human plasma from healthy donors was incubated with NI-Pano (20 μM) for indicated times and analyzed by LCMS. Data are mean ± SD, *n*=3.

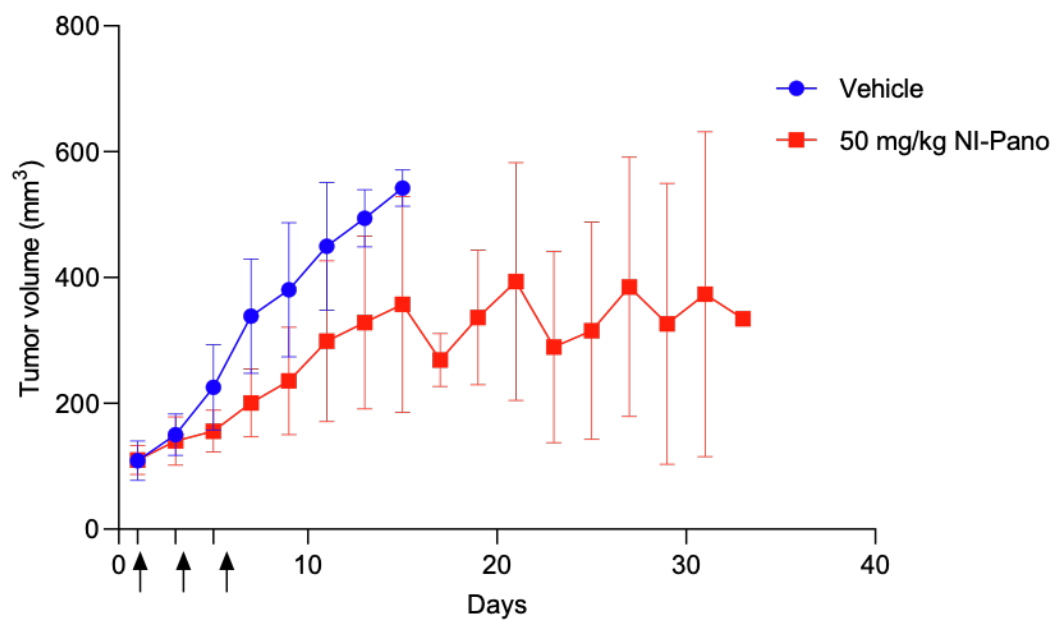

**Figure S6. NI-Pano inhibits growth of OE21 xenografts, related to figure 5.** Tumor volume over time in CD-1 nude mice administered with three doses of either vehicle ( $n=6$ ) or 50 mg/kg NI-Pano ( $n=7$ ). Arrows indicate days of treatment (days 1, 3 and 5). Results are mean  $\pm$  SD.

## SUPPLEMENTARY SCHEMES

Scheme S1. General Synthesis of Panobinostat (2), related to figure 1

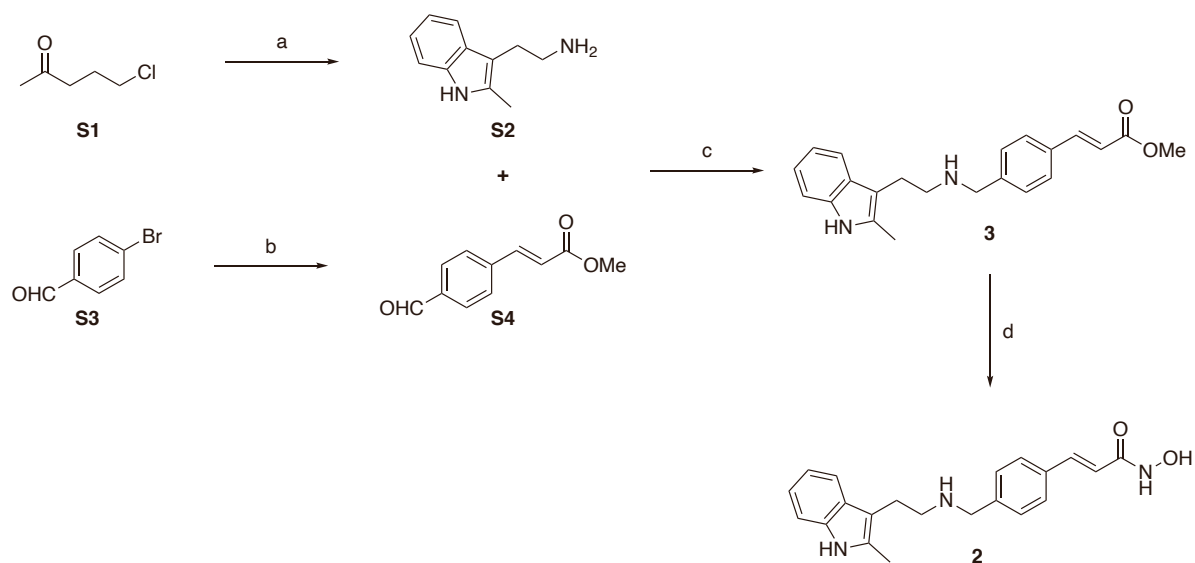

*Reagents and conditions:* (a) PhNHNH<sub>2</sub>, EtOH, 80 °C, 18 h, 79-89%, n=4; (b) Methyl acrylate, Pd(OAc)<sub>2</sub>, KOAc, DMF, 110 °C, 24 h, 94-99%, n=5; (c) ClCH<sub>2</sub>CH<sub>2</sub>Cl, AcOH, 3 Å molecular sieves, rt, 1 h then NaBH(OAc)<sub>3</sub>, rt, 18 h, 52-86%, n=6; (d) KOH, HONH<sub>2</sub>·HCl, MeOH, rt, 20 h, 63%.

**Scheme S2: Synthesis the bio-reductive group precursors S7, S10, S14, S17, related to scheme 1.**

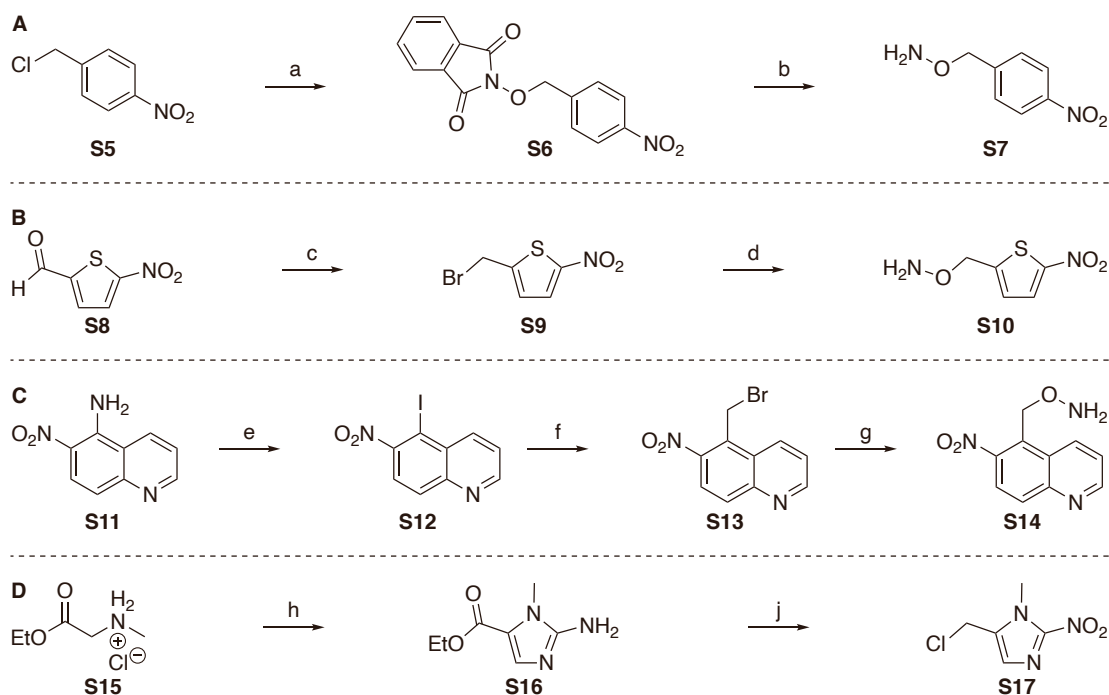

**Reagents and conditions:** (A) (a) *N*-Hydroxyphthalimide, DIPEA, DMF, 0 °C to rt, 2 h, 76–84%, *n*=2; (b)  $\text{N}_2\text{H}_4\cdot\text{H}_2\text{O}$ ,  $\text{CH}_2\text{Cl}_2$ , rt, 2 h, 72–95%, *n*=4. (B) (c) (i)  $\text{NaBH}_4$ , MeOH, 0 °C to rt, 2 h, 79–99%, *n*=4; (ii)  $\text{PBr}_3$ ,  $\text{CH}_2\text{Cl}_2$ , 0 °C to rt, 5 h, 24–48%, *n*=4; (d) (i) *N*-Hydroxyphthalimide, DIPEA, DMF, 0 °C to rt, 2 h, 47–63%, *n*=2, (ii)  $\text{N}_2\text{H}_4\cdot\text{H}_2\text{O}$ ,  $\text{CH}_2\text{Cl}_2$ , rt 2 h, 46%, *n*=1. (C) (e)  $\text{CuI}$ ,  $\text{NaNO}_2$ , HI (57% aq.), DMSO, 60 °C, 0.5 h, 31–60%, *n*=2; (f) (i)  $\text{PhMgCl}$ , THF, –40 °C, 10 min then  $(\text{CH}_2\text{O})_n$ , –40 °C to 40 °C, 18 h, 42–86%, *n*=4; (ii)  $\text{HBr}$  (48% aq.), 75 °C, 18 h, 77–99%, *n*=2; (g) (i) *N*-Hydroxyphthalimide, DIPEA, DMF, 0 °C to rt, 2 h, 88%, *n*=1; (ii)  $\text{N}_2\text{H}_4\cdot\text{H}_2\text{O}$ ,  $\text{CH}_2\text{Cl}_2$ , rt 2 h, 92%, *n*=1. (D) (h) (i)  $\text{NaH}$ ,  $\text{EtOCHO}$ , THF, EtOH, 0 °C to rt, 18 h; (ii)  $\text{HCl}$  (37% aq.), EtOH, rt, 2 h; (iii)  $\text{NCNH}_2$ , EtOH,  $\text{H}_2\text{O}$ , 100 °C, 2 h, 41–79% (over 3 steps), *n*=5; (j) (i)  $\text{NaNO}_2$ , AcOH,  $\text{H}_2\text{O}$ , 0 °C to rt, 4 h, 57–81%, *n*=5; (ii)  $\text{NaBH}_4$ , EtOH, THF, 0 °C, 3 h, 70–80%, *n*=5; (iii)  $\text{CH}_3\text{SO}_2\text{Cl}$ , pyridine, 0 °C to rt, 3 h, 54–67%, *n*=5.

**Scheme S3. Synthesis of Pano-acid (S18), related to figure 5**

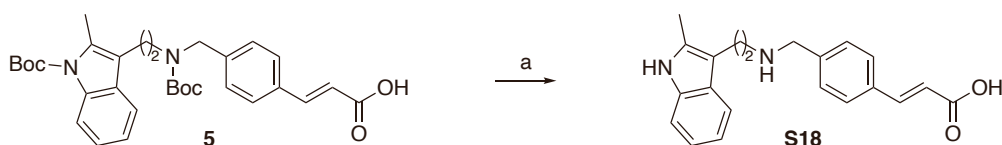

**Reagents and conditions:** (a) TFA, TIPS-H,  $\text{CH}_2\text{Cl}_2$ , rt, 65 min, 78%.

Methyl (E)-3-(4-[[2-(2-methyl-1H-indol-3-yl)ethylamino]methyl]phenyl)prop-2-enoate (**3**)

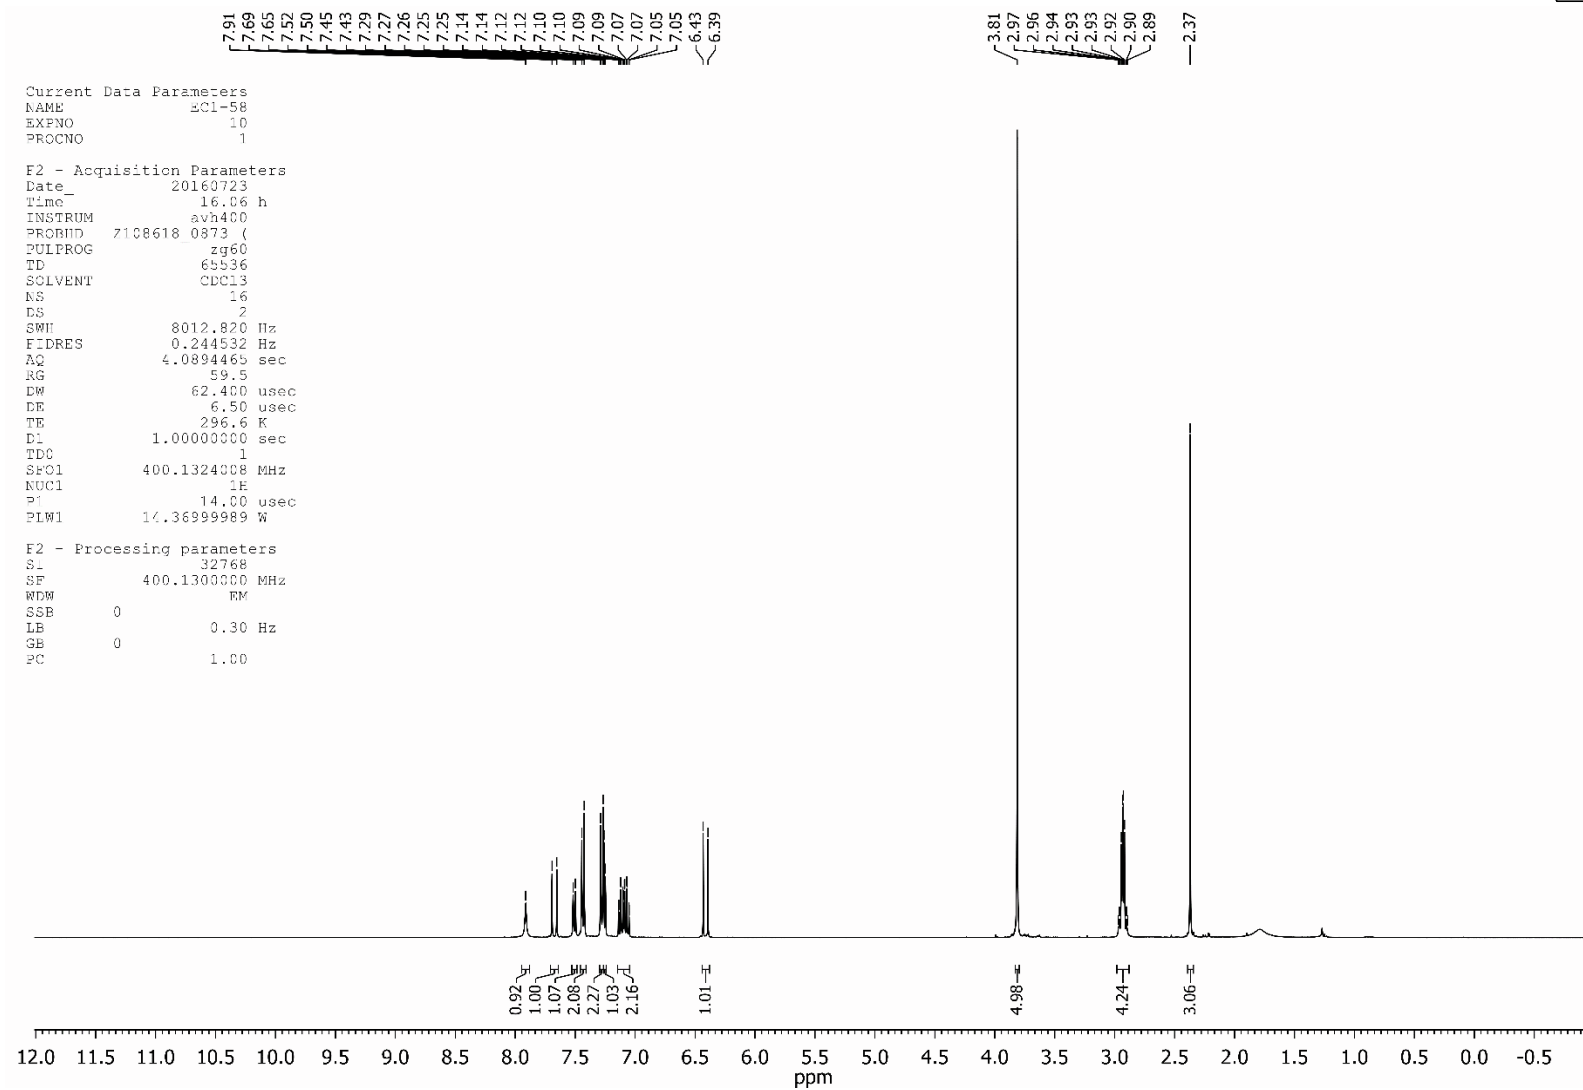

*Methyl (E)-3-(4-[[2-(2-methyl-1H-indol-3-yl)ethylamino]methyl]phenyl)prop-2-enoate (3)*

Current Data Parameters  
 NAME ECI-58  
 EXPNO 13  
 PROCNO 1

F2 - Acquisition Parameters  
 Date\_ 20160723  
 Time 16.29 h  
 INSTRUM avh400  
 PROBHD z1c8618\_c8v3 (   
 PULPROG zgpg30  
 TD 32768  
 SOLVENT CDCl3  
 NS 256  
 DS 4  
 SWH 26041.666 Hz  
 FIDRES 1.589457 Hz  
 AQ 0.6291456 sec  
 RG 197.18  
 DW 19.200 usec  
 DE 6.50 usec  
 TE 297.3 K  
 D1 1.00030030 sec  
 D11 0.03030030 sec  
 TDC 1  
 SFO1 100.6228298 MHz  
 NUC1 13C  
 P1 10.00 usec  
 PLW1 47.86130036 W  
 SFO2 400.1316035 MHz  
 NUC2 1H  
 CPDPRG12 waltz16  
 PCPD2 90.00 usec  
 PLW2 14.36999989 W  
 PLW12 0.34660661 W  
 PLW13 0.17371930 W

F2 - Processing parameters  
 SI 32768  
 SF 100.6127685 MHz  
 WDW BM  
 SSB 0  
 LB 1.00 Hz

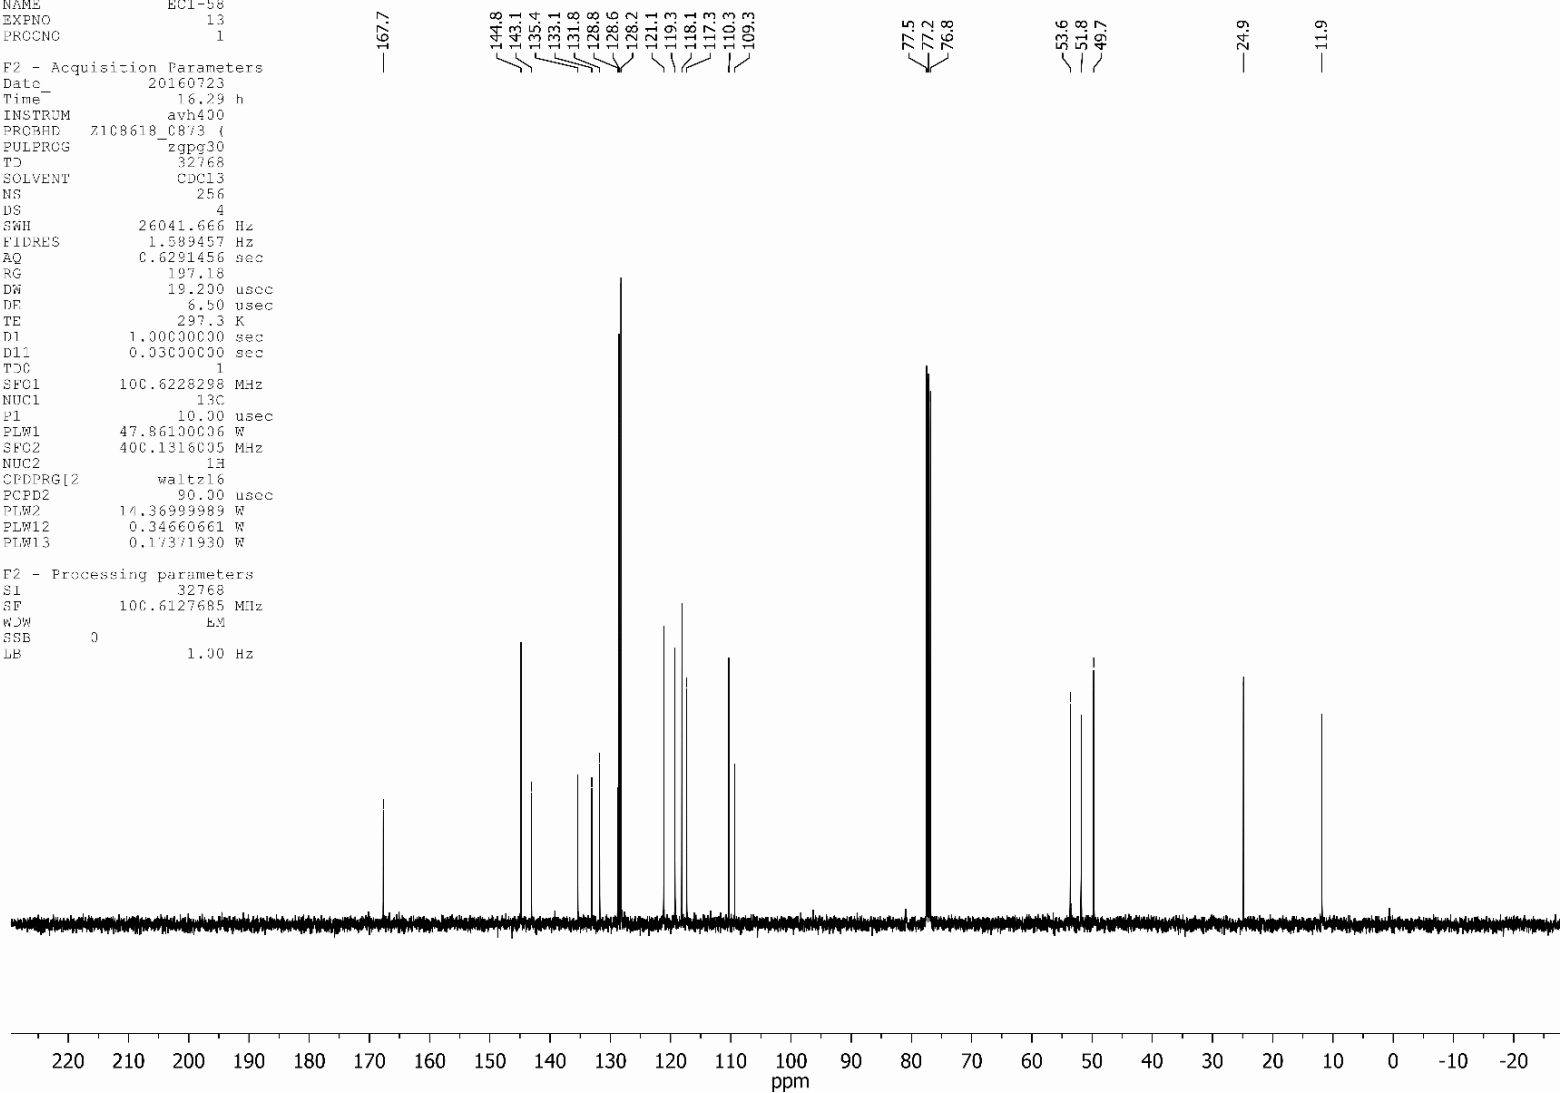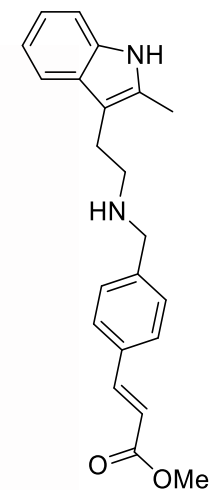



Panobinostat (Pano, 2)

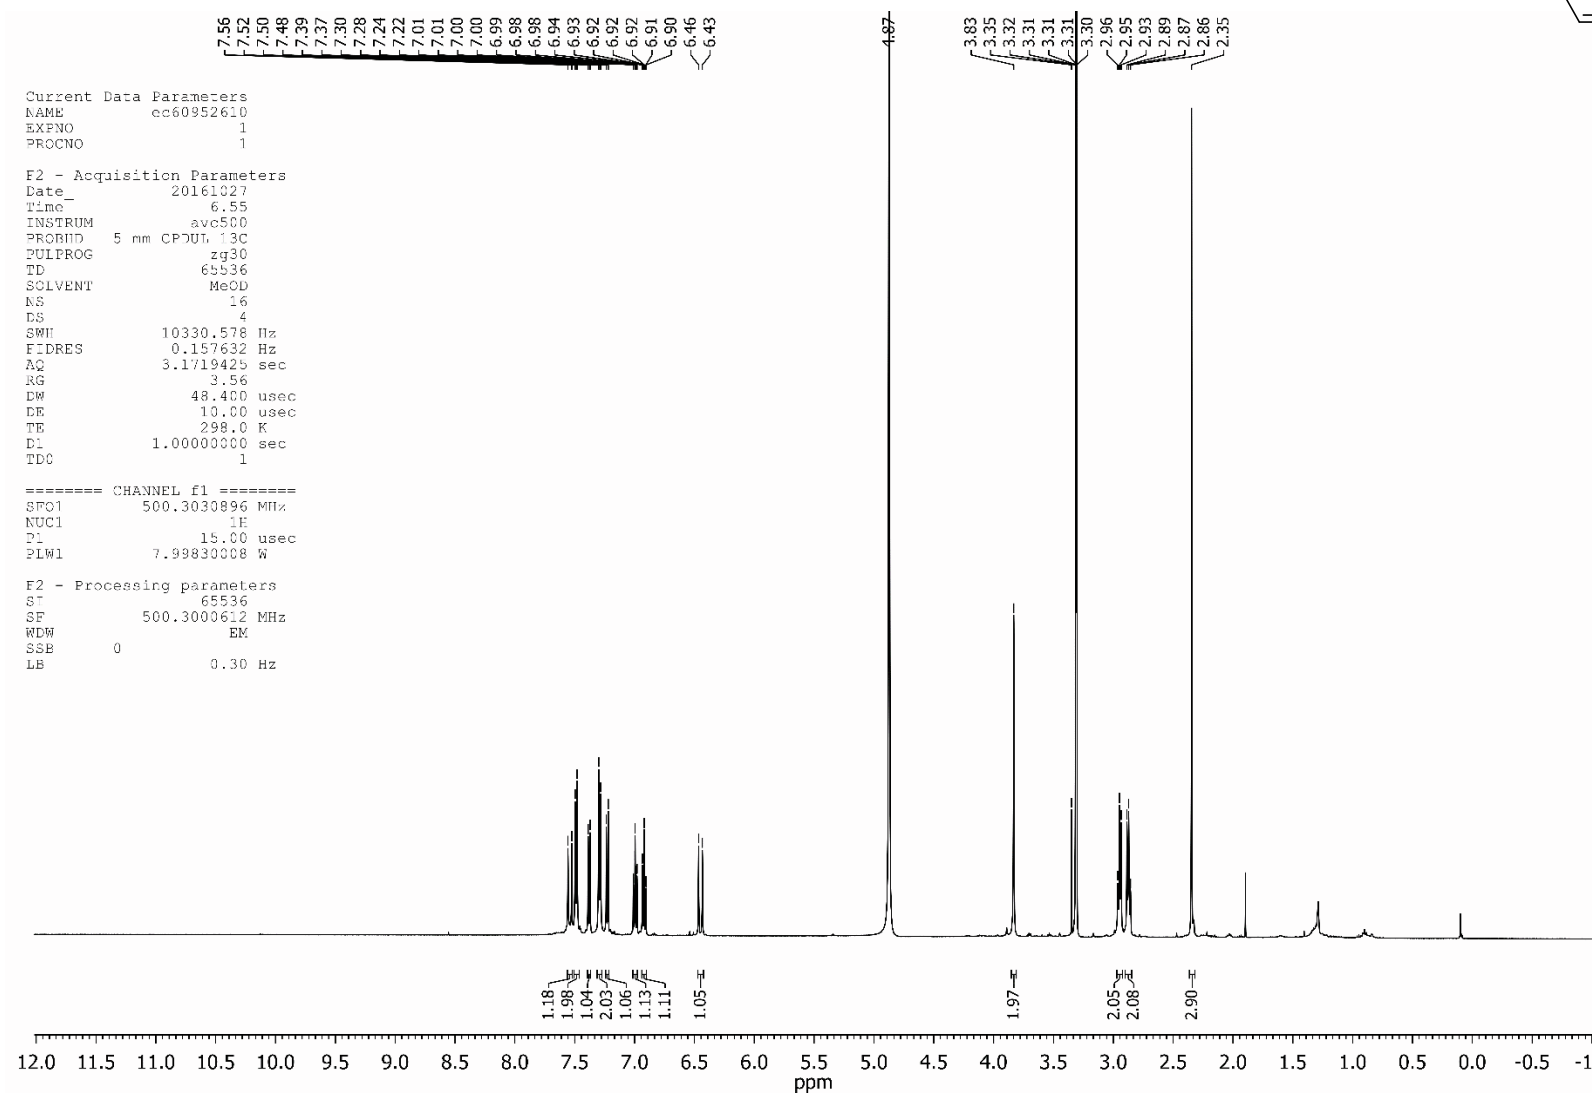

# Panobinostat (Pano, 2)

Current Data Parameters  
 NAME ec60952610  
 EXPNO 4  
 PROCNO 1

F2 - Acquisition Parameters  
 Date\_ 20161027  
 Time 8.26  
 INSTRUM avc500  
 PROBHD 5 mm CPDUL 13C  
 PULPROG zgpg30  
 TD 65536  
 SOLVENT MeOD  
 NS 3072  
 DS 2  
 SWH 31250.000 Hz  
 FIDRES 0.476837 Hz  
 AQ 1.0485760 sec  
 RG 912  
 DW 16.000 usec  
 DE 18.00 usec  
 TE 298.0 K  
 D1 2.00000000 sec  
 D11 0.03000000 sec  
 TD0 1

===== CHANNEL f1 =====  
 SFO1 125.8131152 MHz  
 NUC1 13C  
 P1 10.00 usec  
 PLW1 20.18400002 W

===== CHANNEL f2 =====  
 SFO2 500.3020012 MHz  
 NUC2 1H  
 CPDPRG2 waltz16  
 PCPD2 80.00 usec  
 PLW2 7.99830008 W  
 PLW12 0.28119001 W  
 PLW13 0.17996000 W

F2 - Processing parameters  
 SI 32768  
 SF 125.8005351 MHz  
 WDW EM  
 SSB 0  
 LB 1.00 Hz  
 GB 0  
 PC 1.40

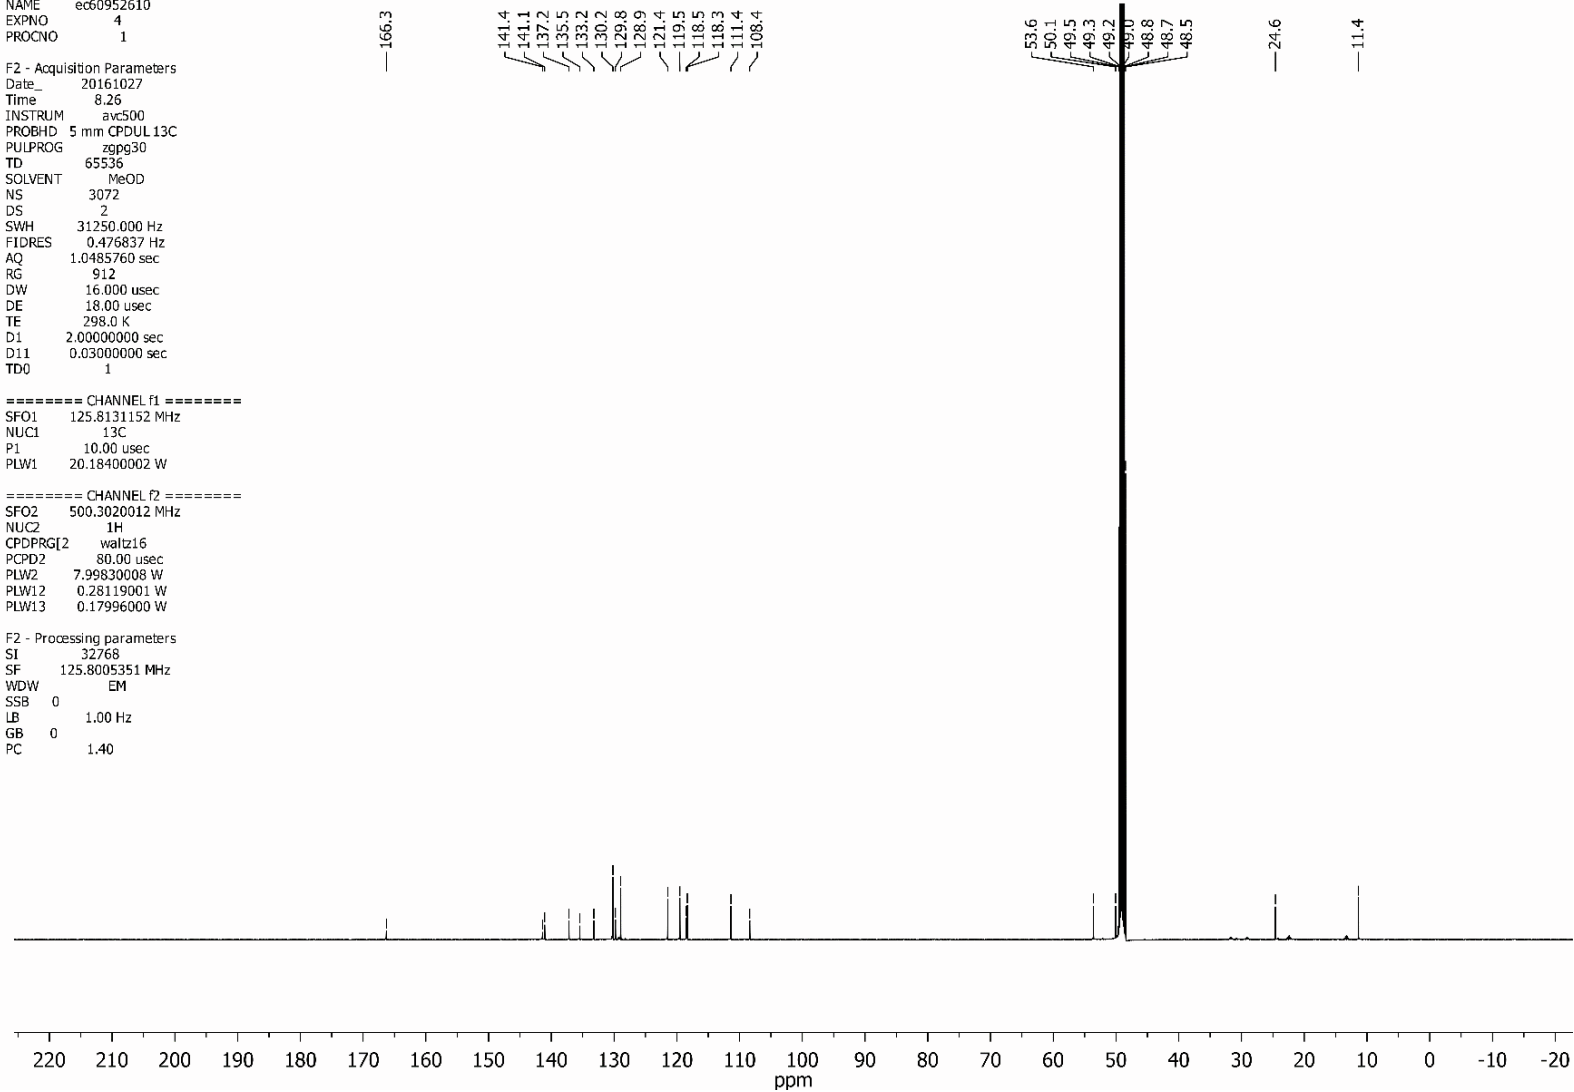

(5-Nitrothiophen-2-yl)methyl bromide (**S9**)

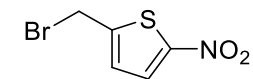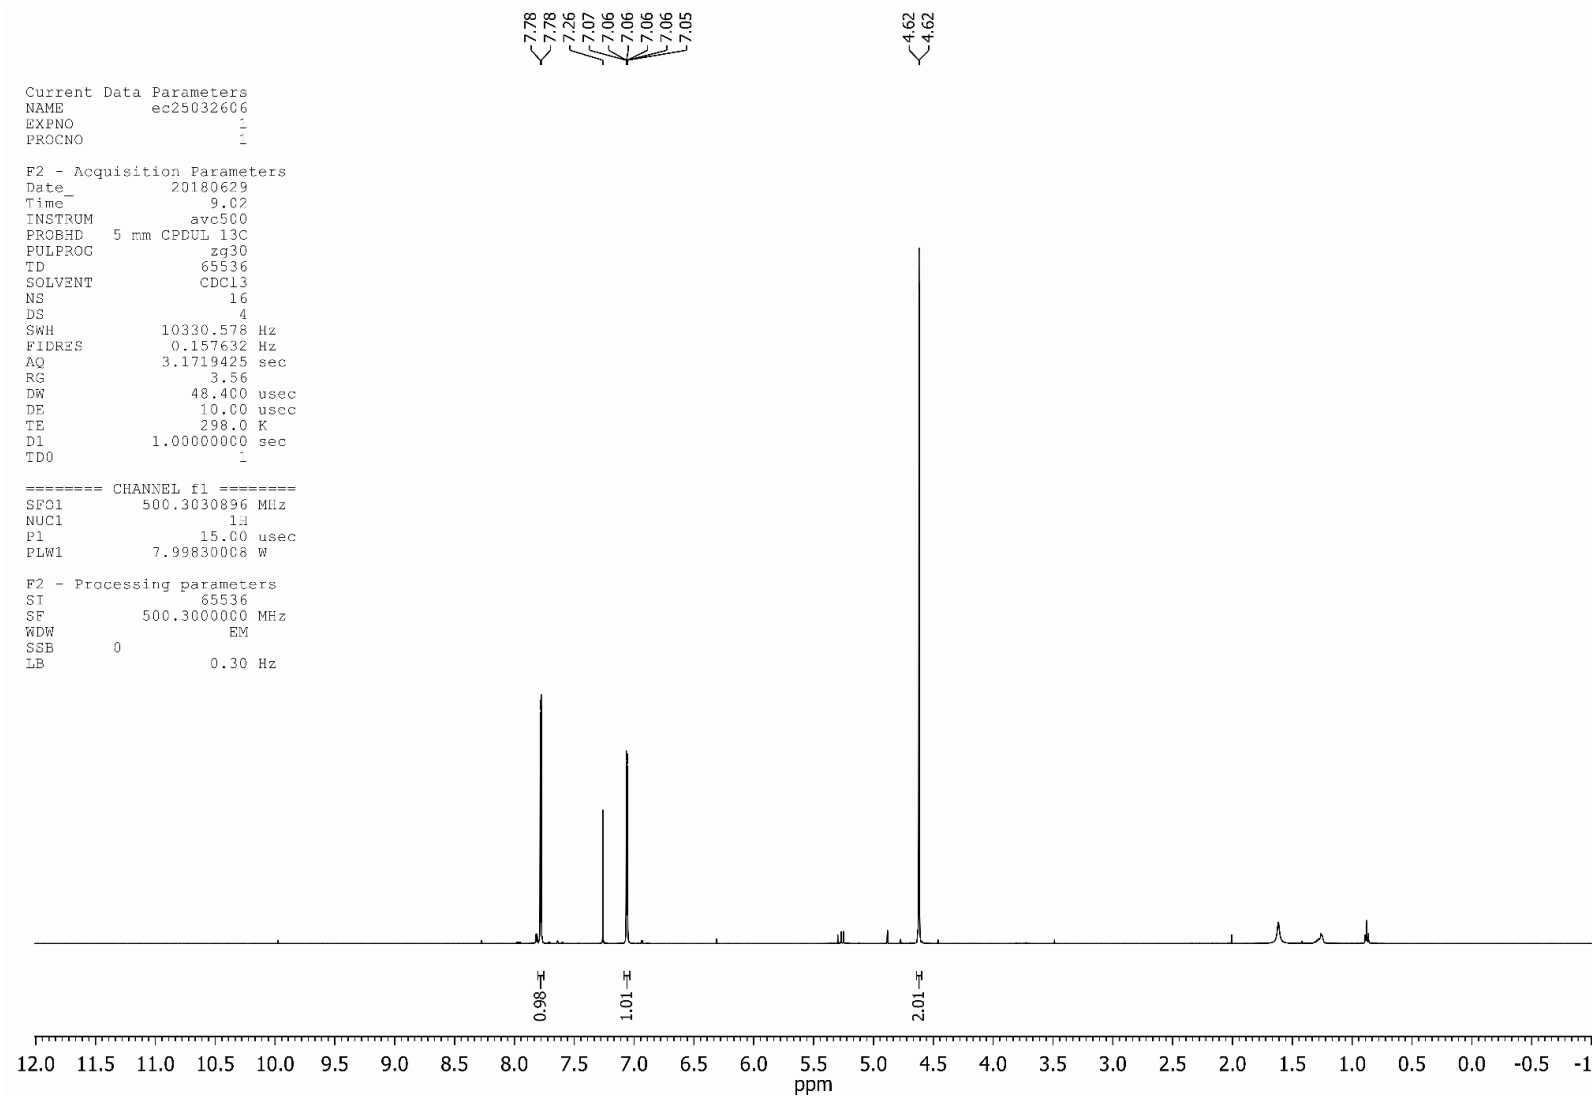

(5-Nitrothiophen-2-yl)methyl bromide (S9)

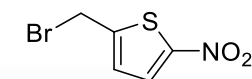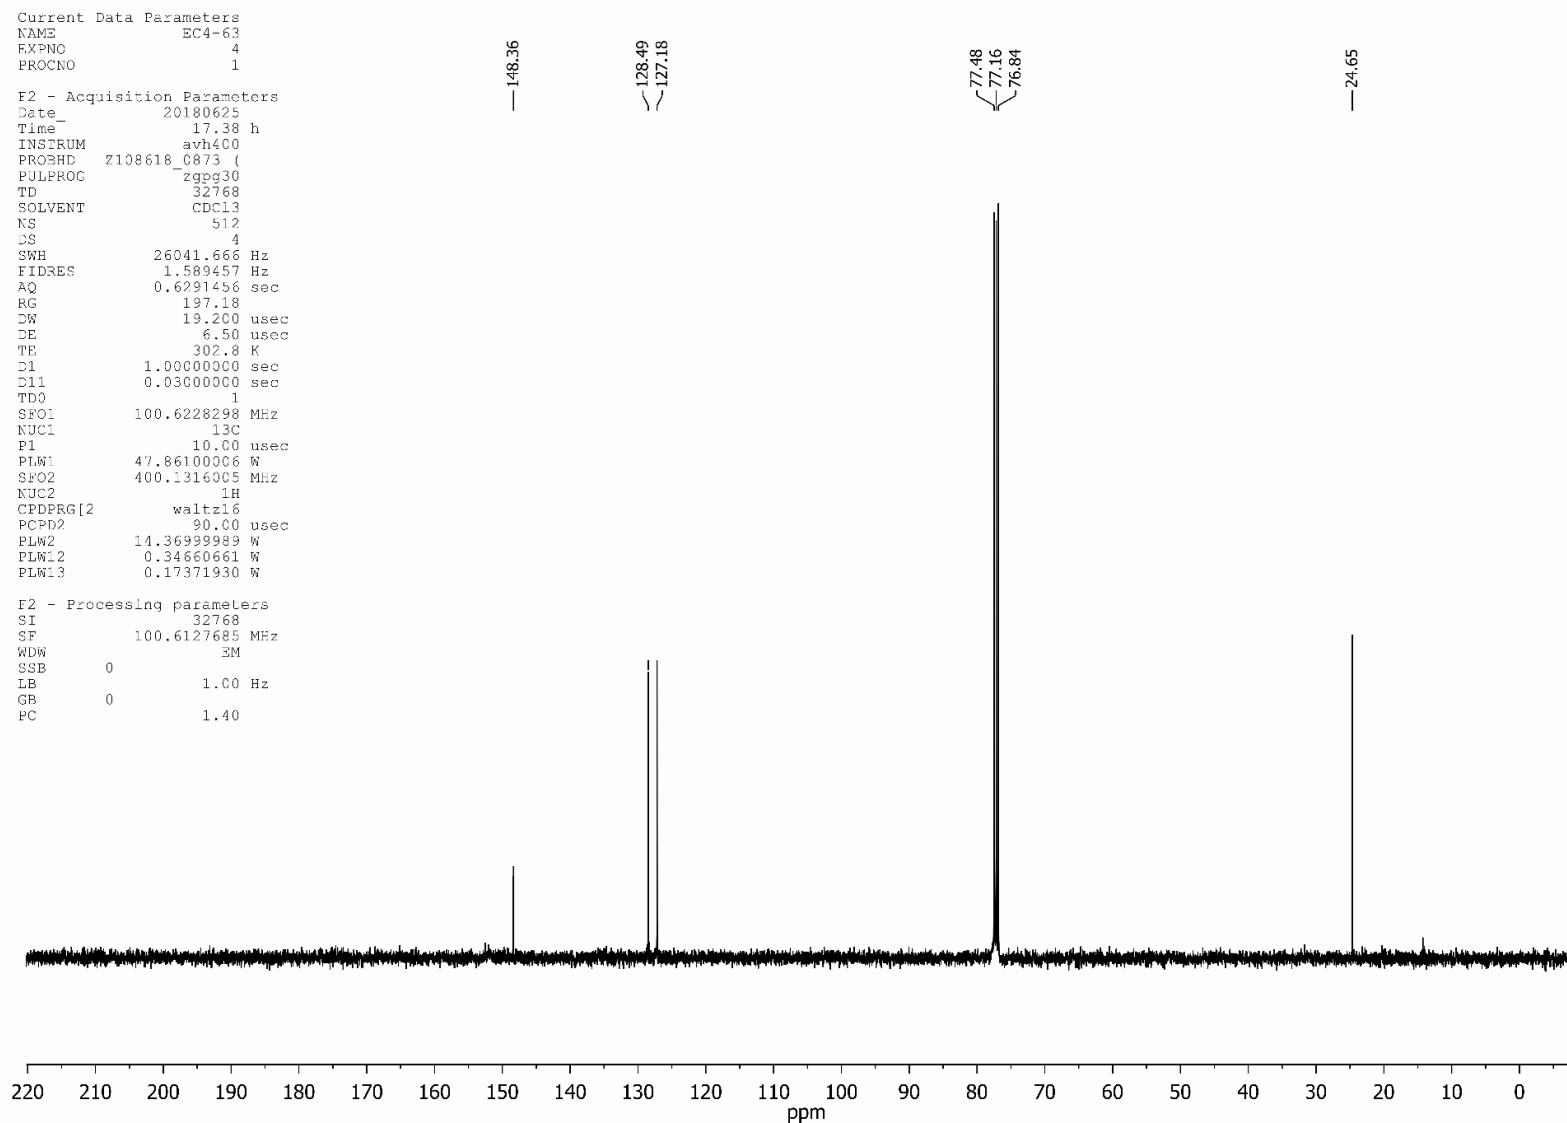

(5-Nitrothiophen-2-yl)methyl bromide (**S9**)

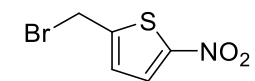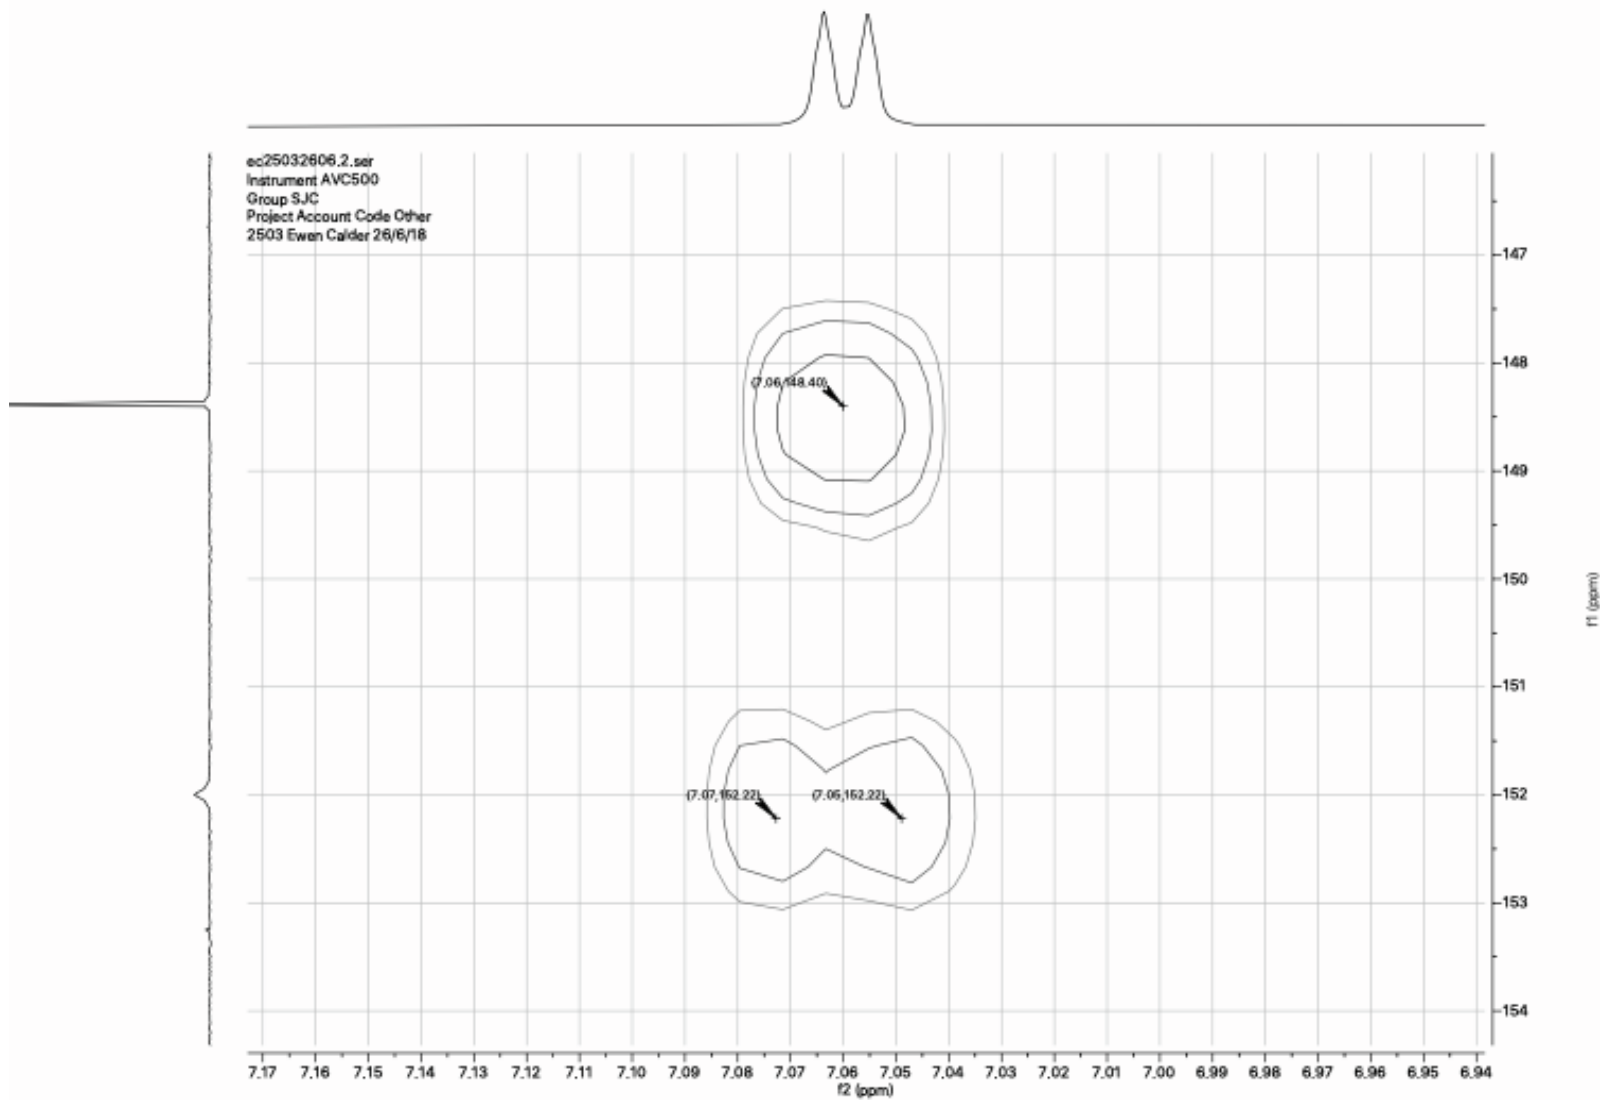

*N*-Phthalimido-*O*-(5-nitrothiophen-2-yl)-hydroxylamine

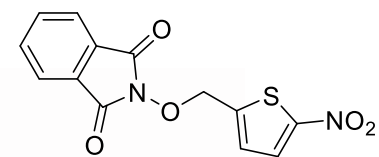

Current Data Parameters  
NAME ec25480307  
EXPNO 1  
PROCNO 1

F2 - Acquisition Parameters  
Date\_ 20180703  
Time 17.29  
INSTRUM avc500  
PROBHD 5 mm CPDUL 13C  
PULPROG zg30  
TD 65536  
SOLVENT CDCl3  
NS 16  
DS 4  
SWH 10330.578 Hz  
FIDRES 0.157632 Hz  
AQ 3.1719425 sec  
RG 3.56  
DW 48.400 usec  
DE 10.00 usec  
TE 298.0 K  
D1 1.00000000 sec  
TD0 1

===== CHANNEL f1 =====  
SFO1 500.3030896 MHz  
NUC1 1H  
P1 15.00 usec  
PLW1 7.99830008 W

F2 - Processing parameters  
SI 65536  
SF 500.3000000 MHz  
WDW EM  
SSB 0  
LB 0.30 Hz

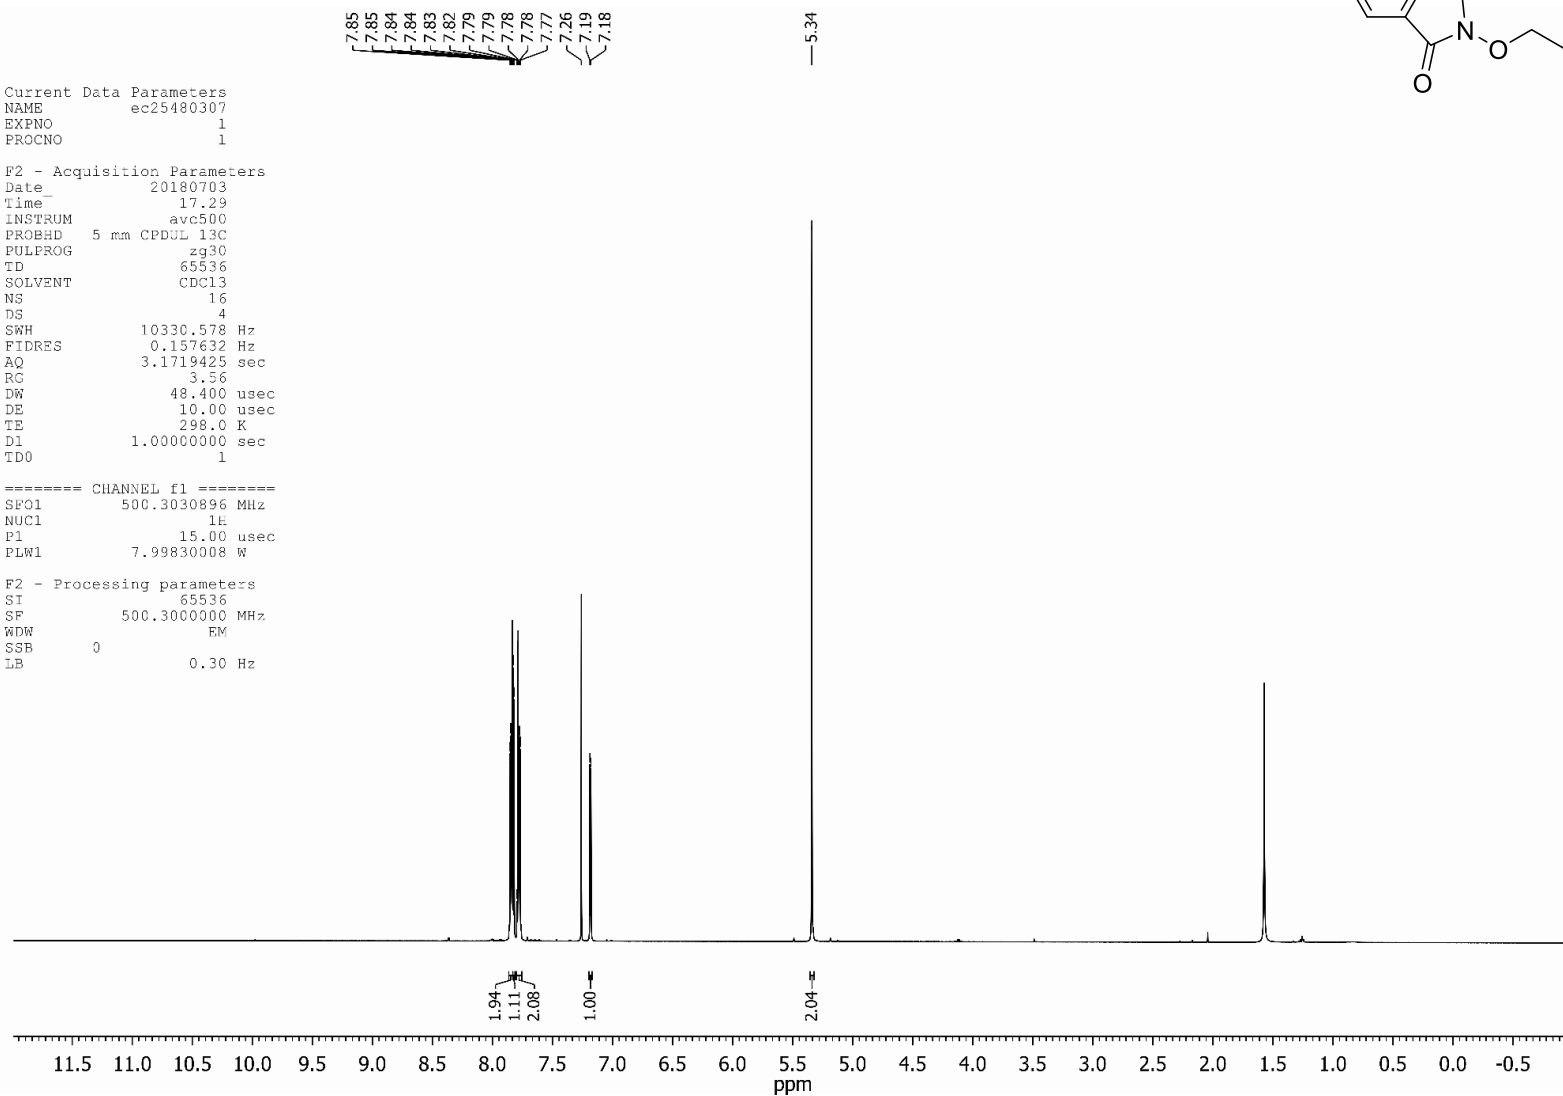

*N*-Phthalimido-*O*-(5-nitrothiophen-2-yl)-hydroxylamine

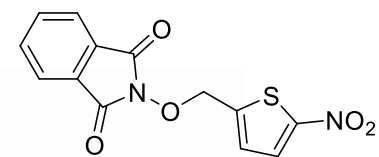

Current Data Parameters  
NAME ec25480307  
EXPNO 4  
PROCNO 1

F2 - Acquisition Parameters  
Date\_ 20180703  
Time\_ 19.01  
INSTRUM avc500  
PROBHD 5 mm CPDUL 13C  
PULPROG zgpg30  
TD 65536  
SOLVENT CDCl3  
NS 1536  
DS 2  
SWH 31250.000 Hz  
FIDRES 0.476837 Hz  
AQ 1.0485760 sec  
RG 912  
DW 16.000 usec  
DE 18.00 usec  
TE 298.0 K  
D1 2.00000000 sec  
D11 0.03000000 sec  
TD0 1

===== CHANNEL f1 =====  
SFO1 125.8131152 MHz  
NUC1 13C  
P1 10.00 usec  
PLW1 20.18400002 W

===== CHANNEL f2 =====  
SFO2 500.3020012 MHz  
NUC2 1H  
CPDPRG[2] waltz16  
PCPD2 80.00 usec  
PLW2 7.99830008 W  
PLW12 0.28119001 W  
PLW13 0.17996000 W

F2 - Processing parameters  
SI 32768  
SF 125.8005351 MHz  
WDW EM  
SSB 0  
LB 1.00 Hz  
GB 0  
PC 1.40

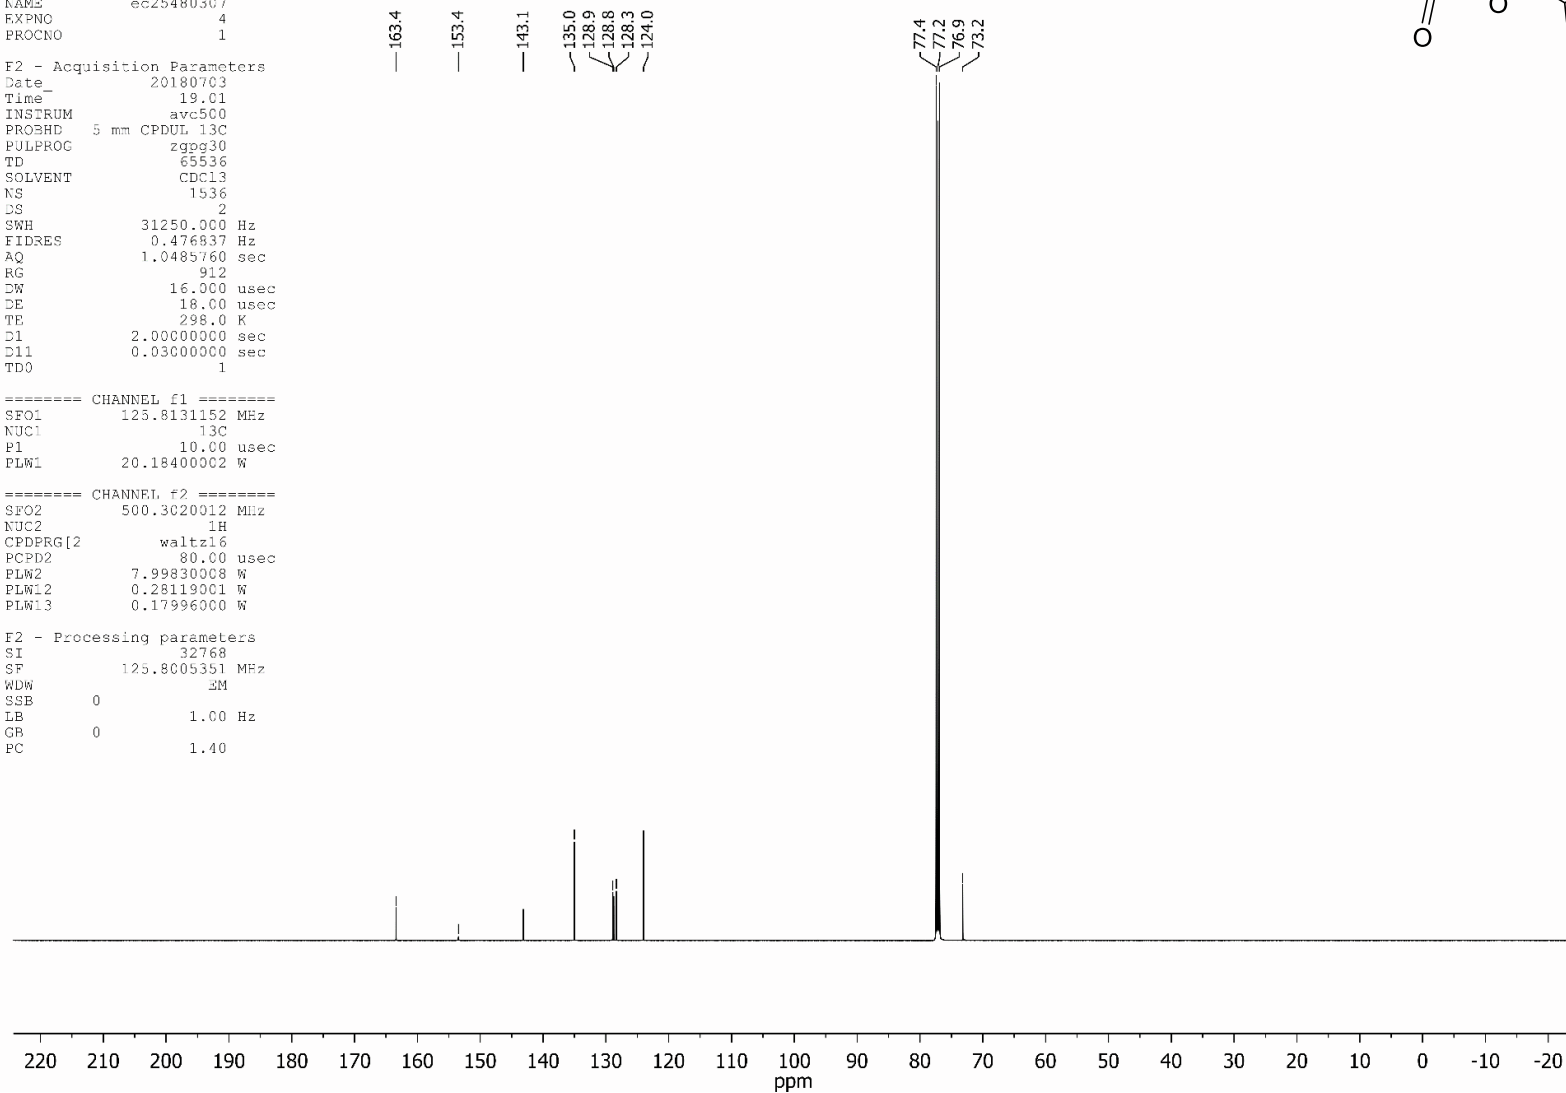

O-(5-Nitrothiophen-2-yl)-hydroxylamine (**S10**)

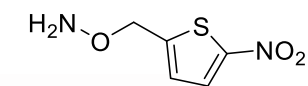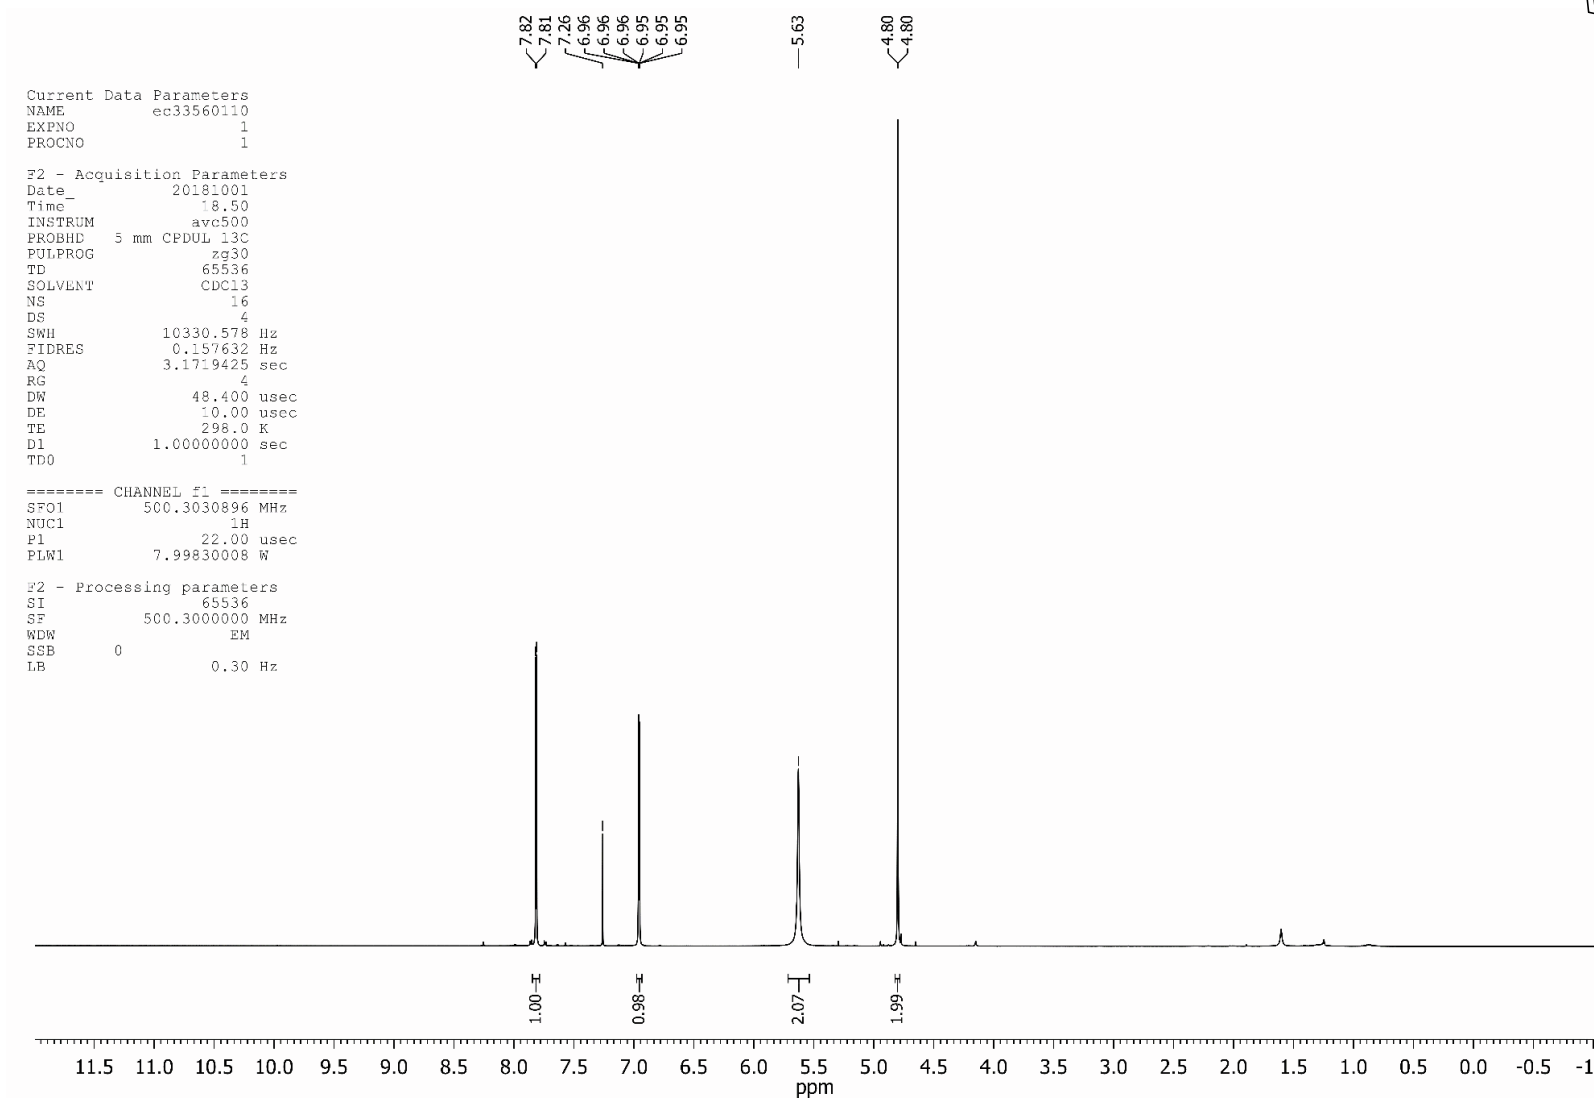



O-(5-Nitrothiophen-2-yl)-hydroxylamine (S10)

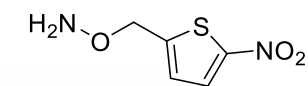

Current Data Parameters  
NAME ec33560110  
EXPNO 2  
PROCNO -

F2 - Acquisition Parameters  
Date\_ 20181001  
Time\_ 21.31  
INSTRUM avc500  
PROBHD 5 mm CPDUL 13C  
PULPROG zgpg30  
TD 65536  
SOLVENT CDCl3  
NS 3072  
DS 2  
SWH 31250.000 Hz  
FIDRES 0.476837 Hz  
AQ 1.0485760 sec  
RG 912  
DW 16.000 usec  
DE 18.00 usec  
TE 298.0 K  
D1 2.00000000 sec  
D11 0.03000000 sec  
TD0 -

===== CHANNEL f1 =====  
SFO1 125.8131152 MHz  
NUC1 13C  
P1 10.00 usec  
PLW1 20.18400002 W

===== CHANNEL f2 =====  
SFO2 500.3020012 MHz  
NUC2 1H  
CPDPRG12 waltz16  
PCPD2 80.00 usec  
PLW2 7.99830008 W  
PLW12 0.60487002 W  
PLW13 0.38712001 W

F2 - Processing parameters  
SI 32768  
SF 125.8005351 MHz  
WDW EM  
SSB 0  
LB 1.00 Hz  
GB 0

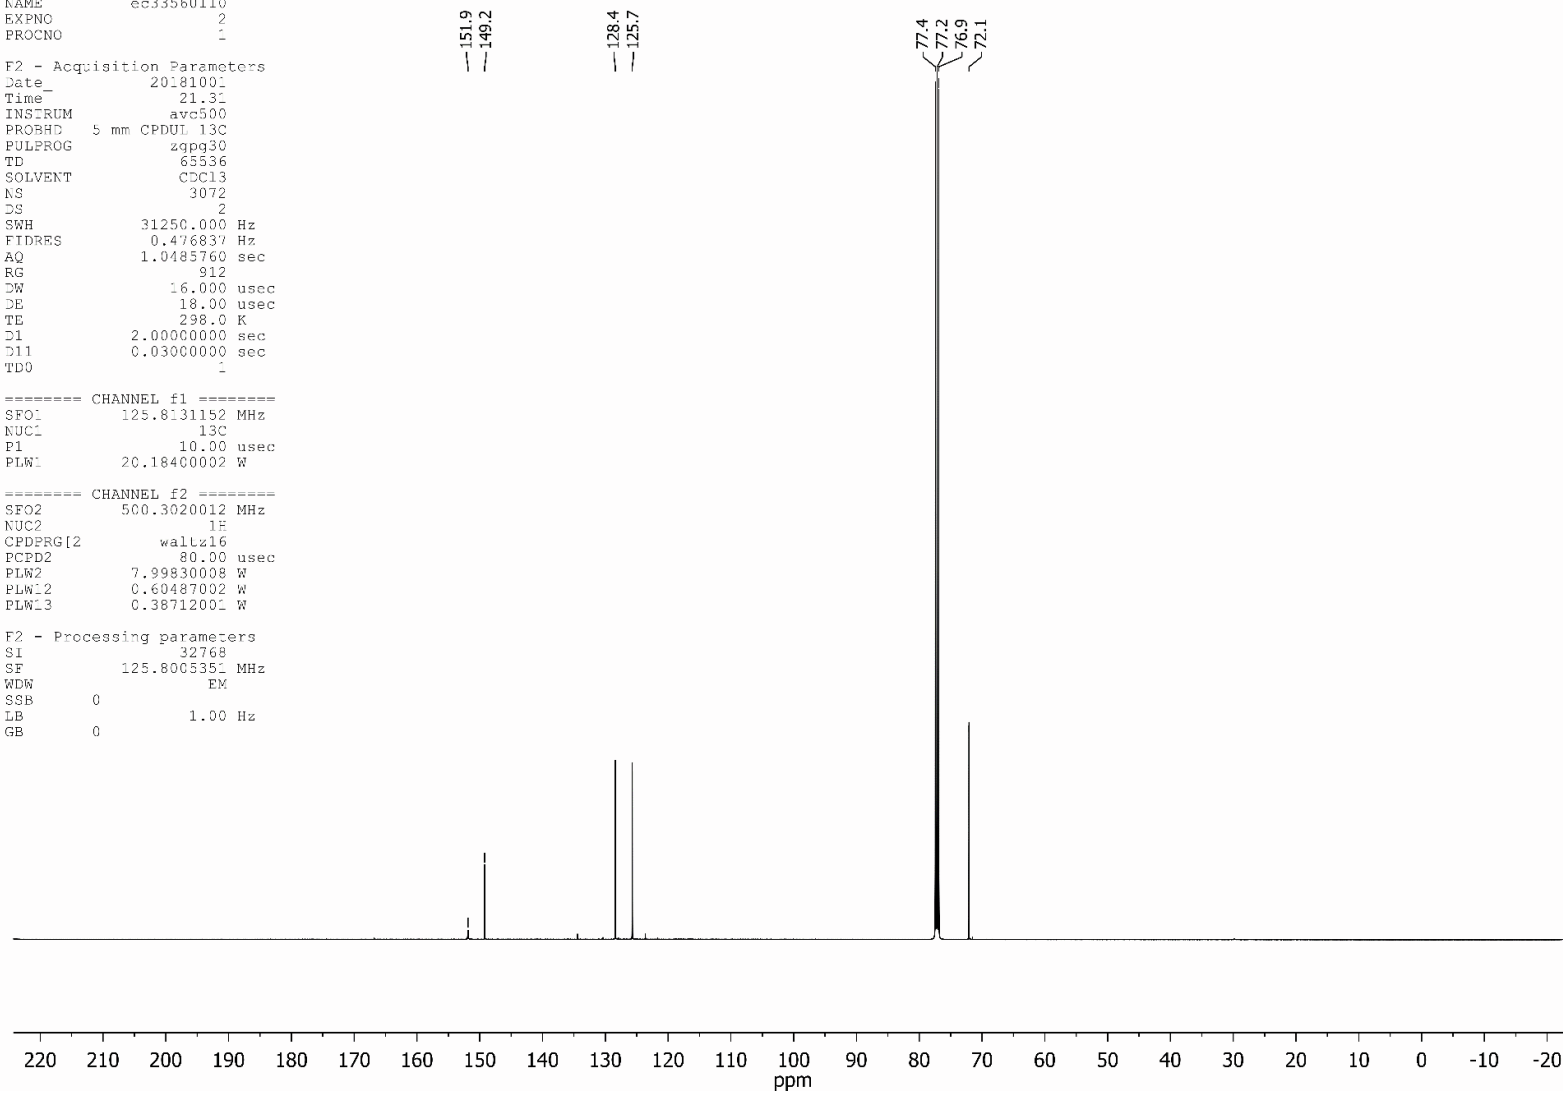

*N*-Phthalimido-*O*-(6-nitroquinolin-5-yl)-hydroxylamine

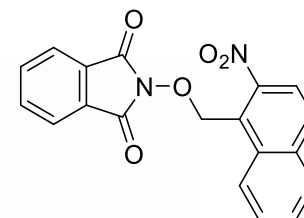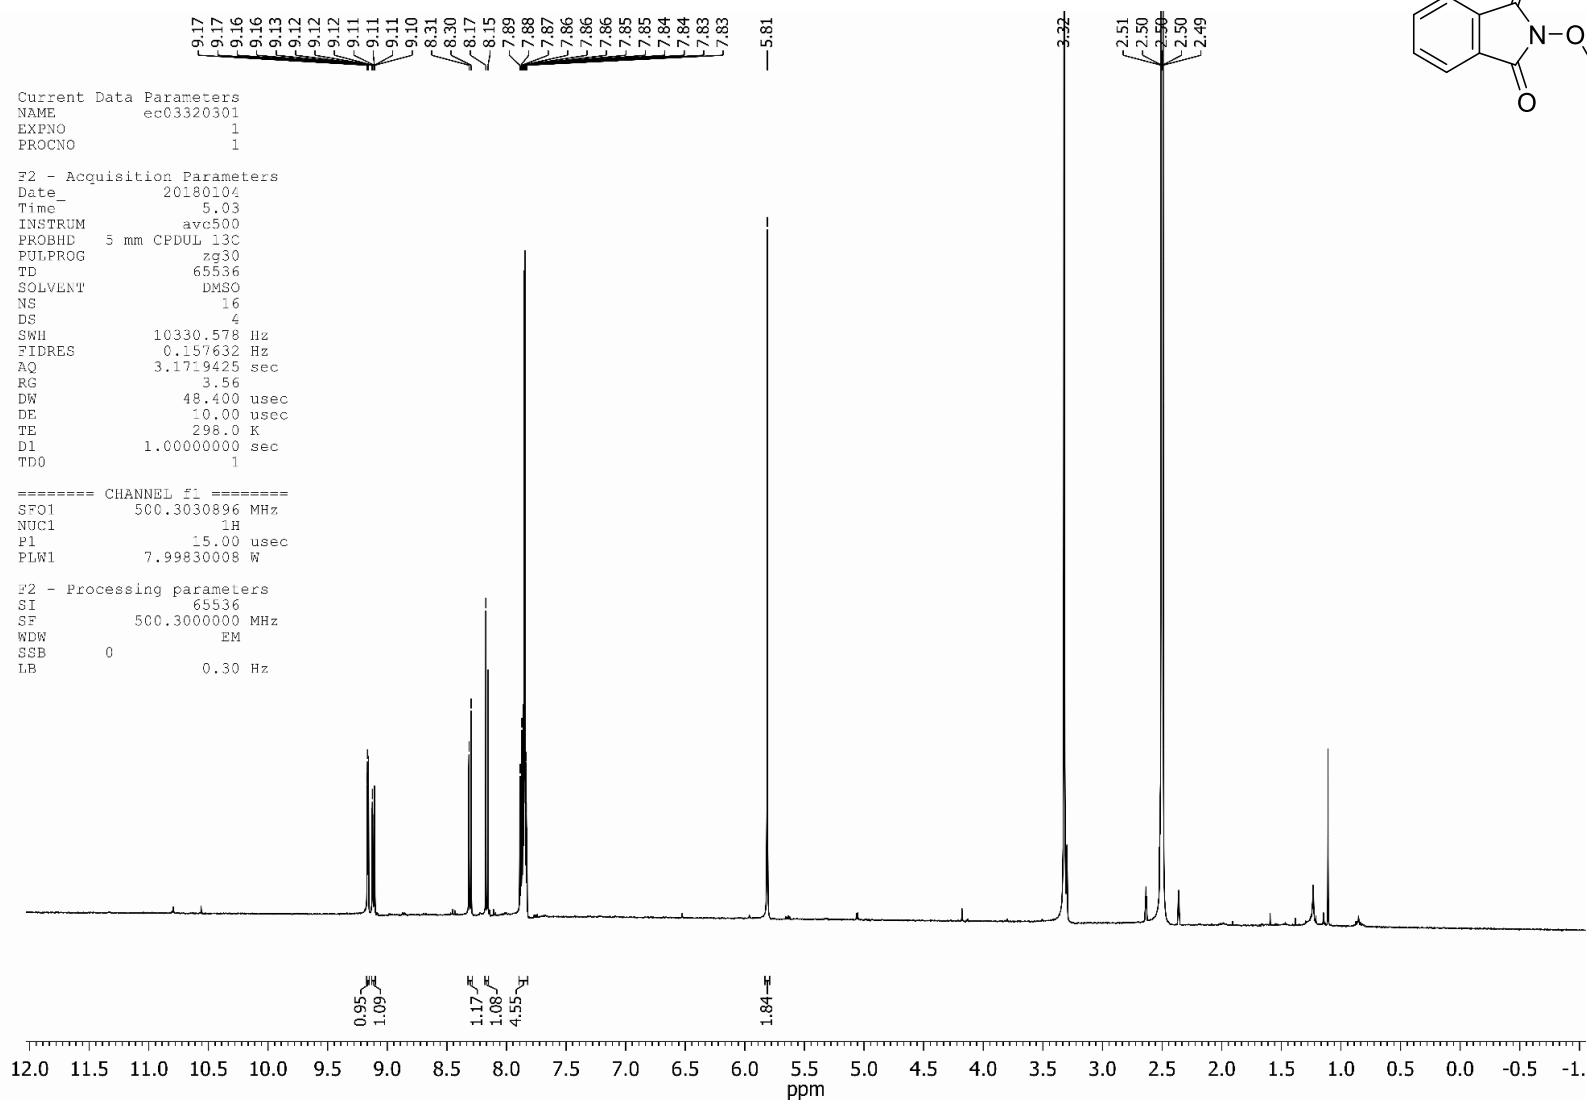

*N*-Phthalimido-*O*-(6-nitroquinolin-5-yl)-hydroxylamine

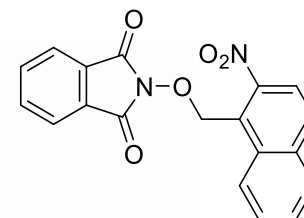

```

Current Data Parameters
NAME      ec03320301
EXPNO     4
PROCNO    1

F2 - Acquisition Parameters
Date_     20180104
Time      8.10
INSTRUM   avc500
PROBHD    5 mm CPDUI, 13C
PULPROG   zgpg30
TD        65536
SOLVENT   DMSO
NS        3072
DS        2
SWH        31250.000 Hz
FIDRES     0.476837 Hz
AQ         1.0485760 sec
RG         912
DW         16.000 usec
DE         18.00 usec
TE        298.0 K
D1         2.0000000 sec
D11        0.0300000 sec
TD0        1

----- CHANNEL f1 -----
SFO1      125.8131152 MHz
NUC1       13C
P1         10.00 usec
PLW1       20.18400002 W

===== CHANNEL f2 =====
SFO2      500.3020012 MHz
NUC2        1H
CPDPRG[2]  waltz16
PCPD2       80.00 usec
PLW2       7.99830008 W
PLW12      0.28119001 W
PLW13      0.17996000 W

F2 - Processing parameters
SI         32768
SF         125.8005351 MHz
WDW        EM
SSB        0
LB         1.00 Hz
GB         0
PC         1.40
    
```

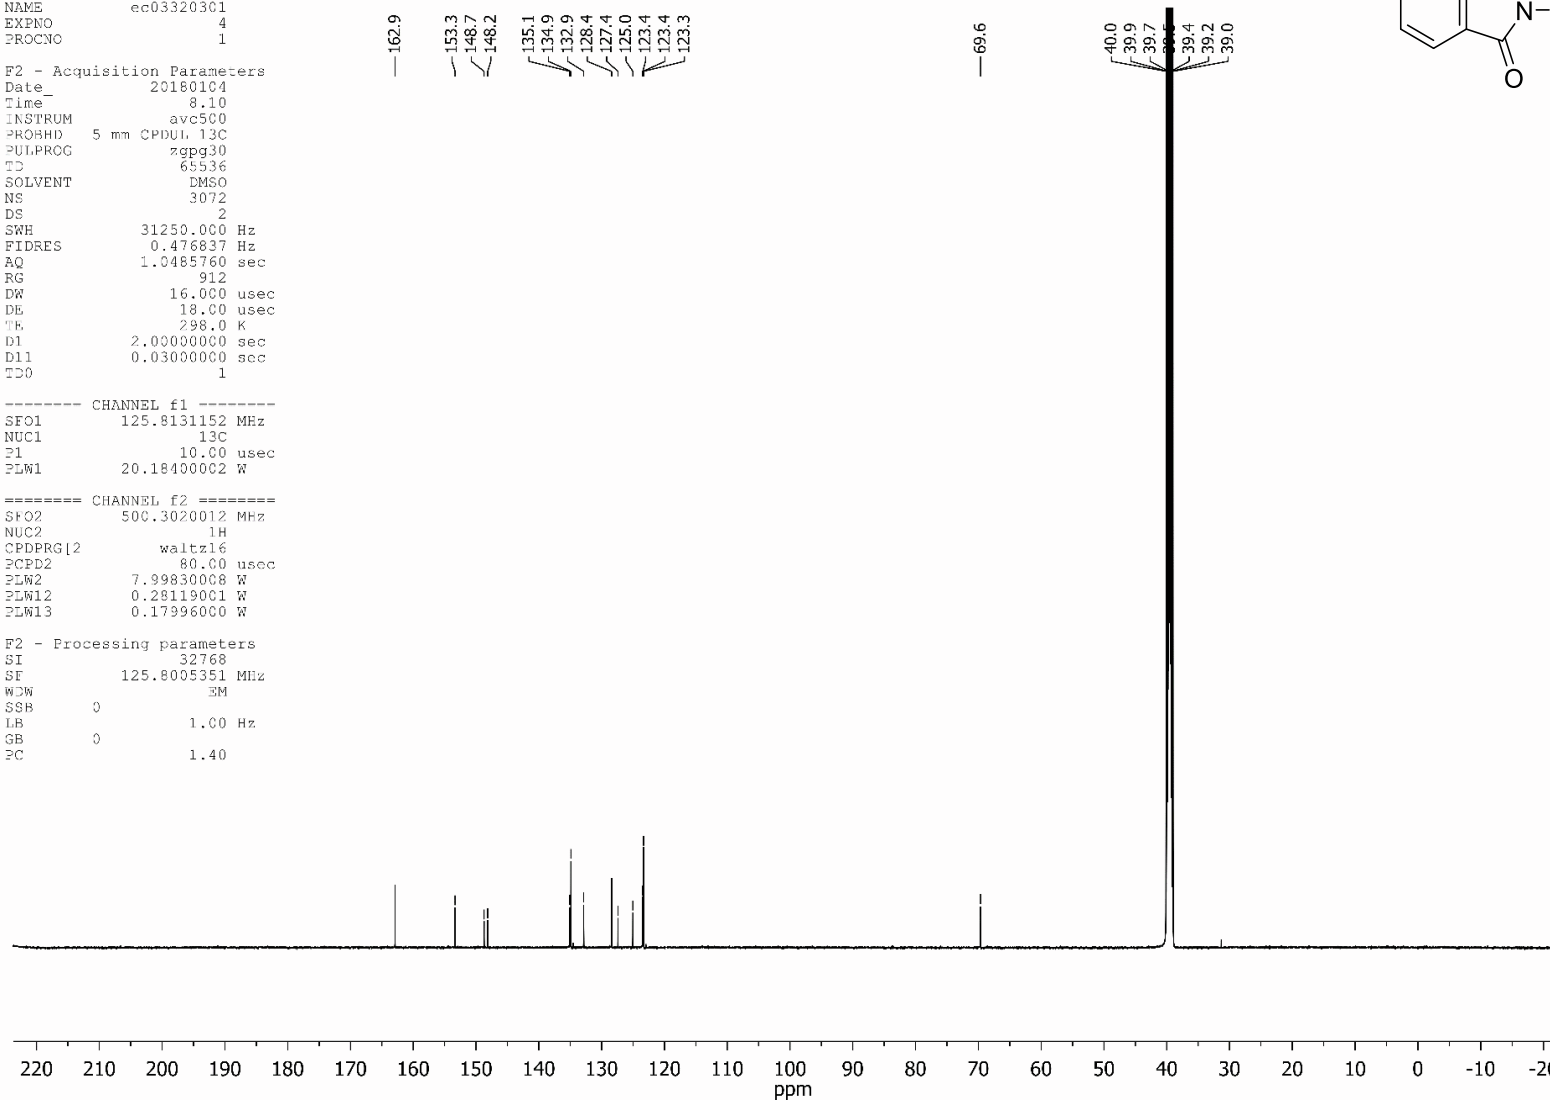

*O*-(6-Nitroquinolin-5-yl)-hydroxylamine (**S14**)

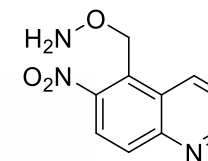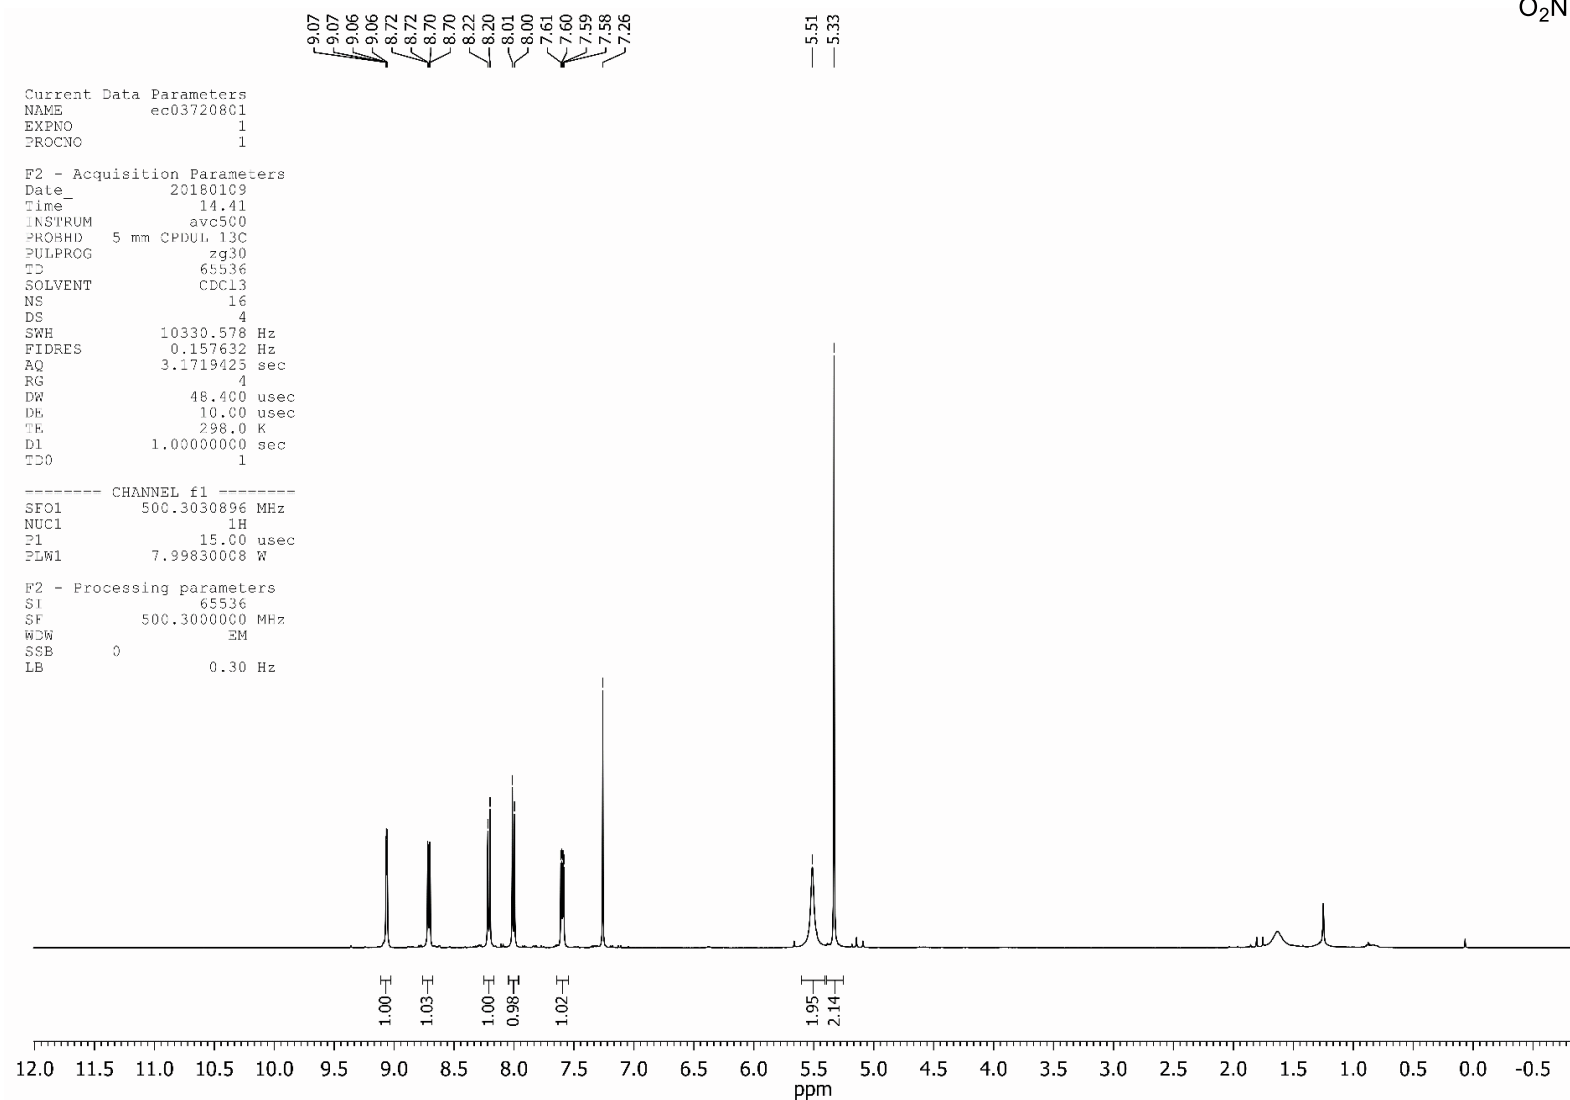

O-(6-Nitroquinolin-5-yl)-hydroxylamine (**S14**)

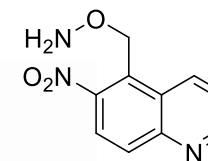

Current Data Parameters  
NAME ec03720801  
EXPNO 3  
PROCNO 1

F2 - Acquisition Parameters  
Date\_ 20180109  
Time\_ 15.45  
INSTRUM avc500  
PROBHD 5 mm CPDUL 13C  
PULPROG zgpg30  
TD 65536  
SOLVENT CDCl3  
NS 1024  
DS 2  
SWH 31250.000 Hz  
FIDRES 0.476837 Hz  
AQ 1.0485760 sec  
RG 912  
LW 16.000 usec  
DE 18.00 usec  
TE 298.0 K  
D1 2.00000000 sec  
D11 0.03000000 sec  
TDC 1

===== CHANNEL f1 =====  
SFO1 125.8131152 MHz  
NUC1 13C  
P1 10.00 usec  
PLW1 20.18400002 W

===== CHANNEL f2 =====  
SFO2 500.3020012 MHz  
NUC2 1H  
CPDPRG12 waltz16  
PCPD2 80.00 usec  
PLW2 7.99830008 W  
PLW12 0.28119001 W  
PLW13 0.17996000 W

F2 - Processing parameters  
SI 32768  
SF 125.8005351 MHz  
WDM FM  
SSB 0  
LB 1.00 Hz  
GB 0  
PC 1.40

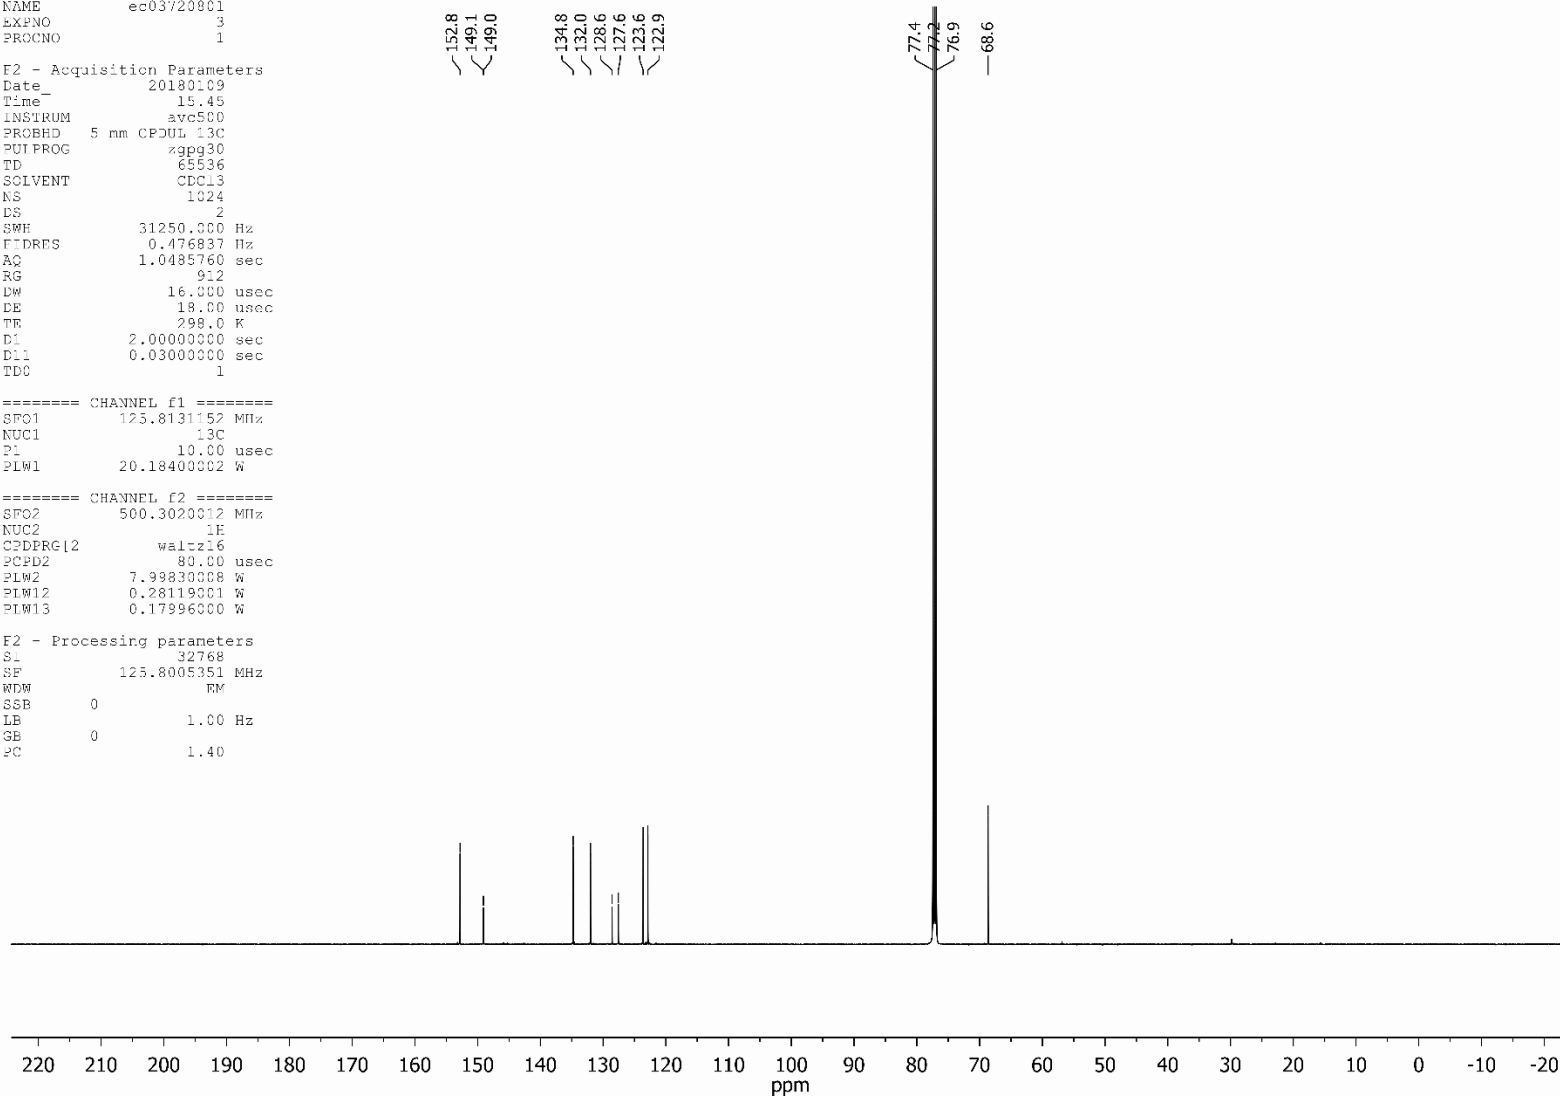

Methyl (E)-3-(4-[[*tert*-butoxycarbonyl-(2-[1-(*tert*-butoxycarbonyl)-2-methyl-1*H*-indol-3-yl]ethyl)amino]methyl]phenyl)prop-2-enoate (**4**)

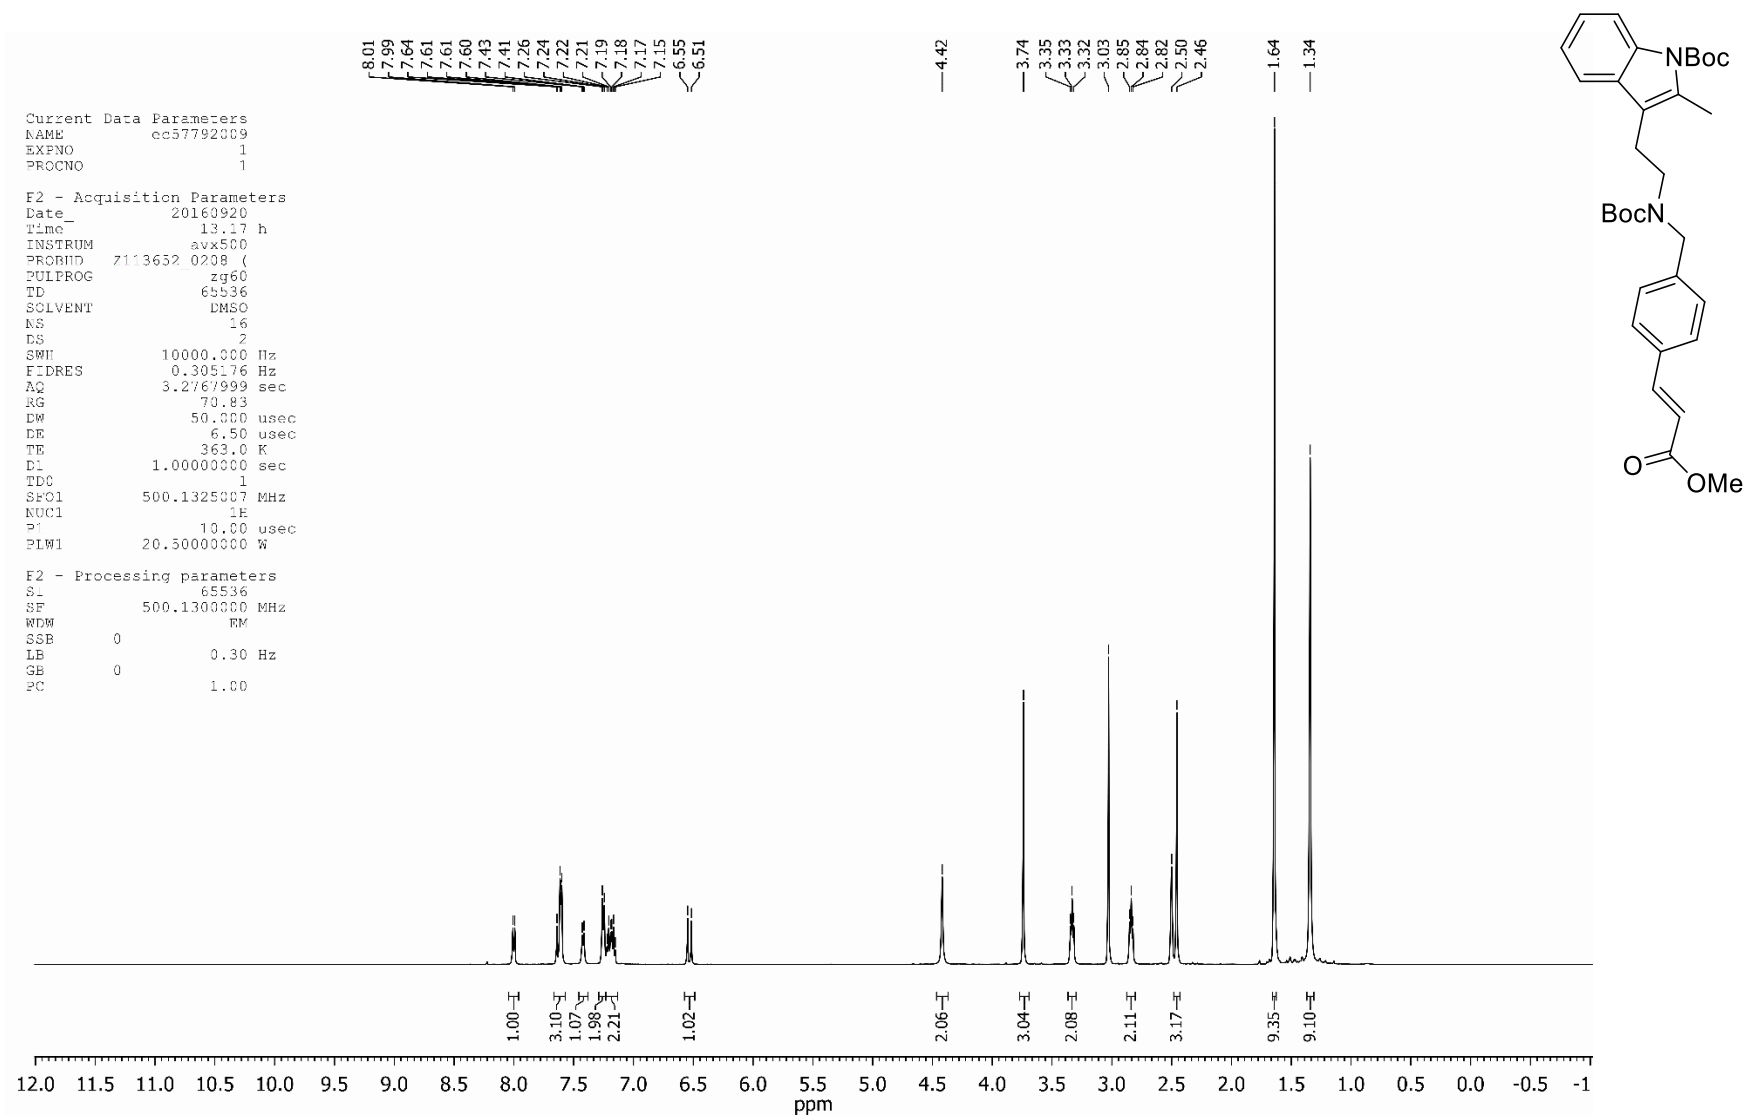

Methyl (E)-3-(4-[[*tert*-butyloxycarbonyl-(2-{1-[*tert*-butyloxycarbonyl]-2-methyl-1*H*-indol-3-yl}ethyl)amino]methyl]phenyl)prop-2-enoate (**4**)

Current Data Parameters  
NAME ec5779209  
EXPNO 4  
PROCNO 1

F2 - Acquisition Parameters  
Date\_ 20160920  
Time\_ 15.37 h  
INSTRUM avx500  
PROBHD z113652\_C208 (4  
PULPROG zgpg30  
TD 65536  
SOLVENT DMSO  
NS 2346  
DS 4  
SWH 29761.904 Hz  
FIDRES 0.998261 Hz  
AQ 1.1010048 sec  
RG 191.37  
DW 16.800 usec  
DE 6.50 usec  
TE 363.0 K  
D1 2.00030030 sec  
D11 0.03030030 sec  
TDC 1  
SFO1 125.7703643 MHz  
NUC1 13C  
P1 10.00 usec  
PLW1 76.00030030 W  
SFO2 500.1320035 MHz  
NUC2 1H  
CPDPRG12 waltz16  
PCPD2 80.00 usec  
PLW2 20.50030030 W  
PLW12 0.32031030 W  
PLW13 0.16111030 W

F2 - Processing parameters  
SI 32768  
SF 125.7577885 MHz  
WDW BM  
SSE 0  
LB 1.00 Hz  
GB 0  
PC 1.40

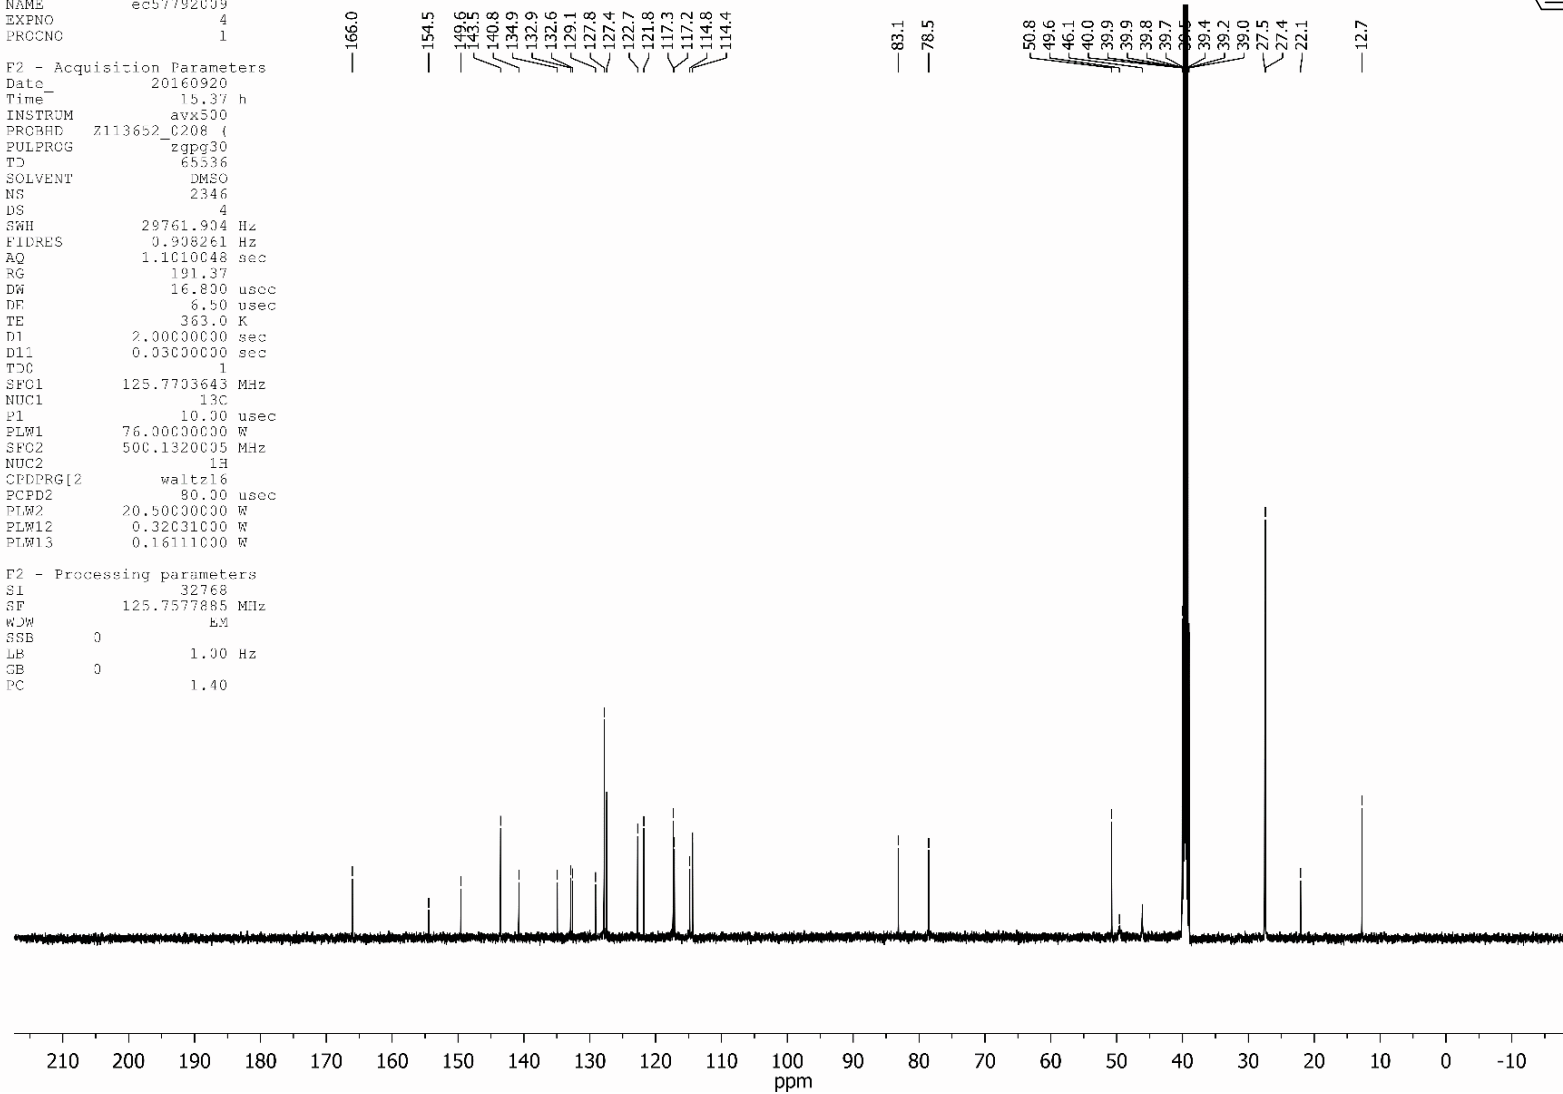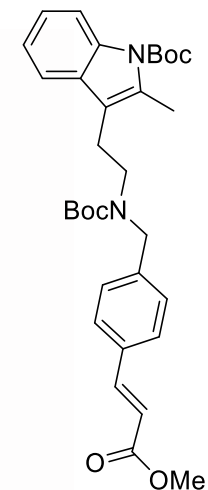

(*E*)-3-(4-[[*tert*-Butyloxycarbonyl-(2-{1-[*tert*-butyloxycarbonyl]-2-methyl-1*H*-indol-3-yl)ethyl]amino)methyl}phenyl)prop-2-enoic acid (**5**)

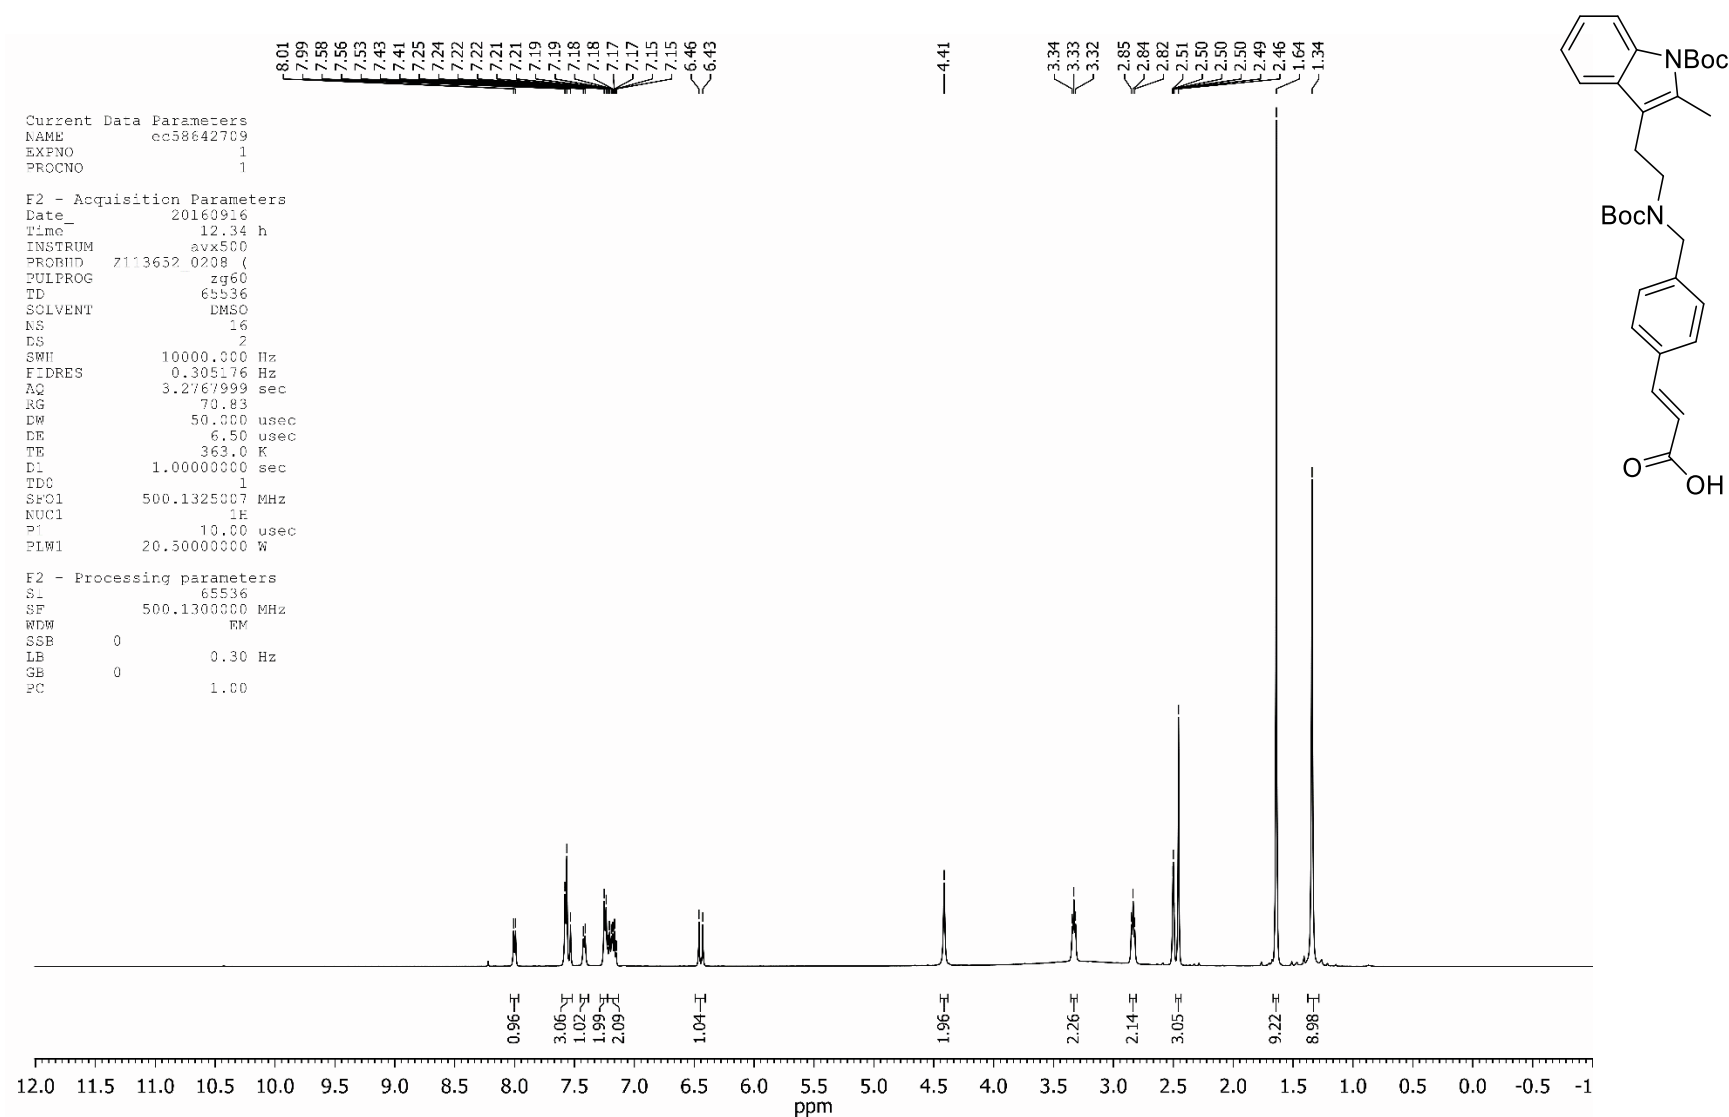



(E)-3-(4-([*tert*-Butyloxycarbonyl-(2-{1-[*tert*-butyloxycarbonyl]-2-methyl-1*H*-indol-3-yl)ethyl]amino)methyl}phenyl)prop-2-enoic acid (5)

Current Data Parameters  
NAME ec58642709  
EXPNO 4  
PROCNO 1

F2 - Acquisition Parameters  
Date\_ 20160927  
Time\_ 16.04 h  
INSTRUM avx500  
PROBHD z1136b2\_0208 {  
PULPROG zgpg30  
TD 65536  
SOLVENT DMSO  
NS 3072  
DS 4  
SWH 29761.904 Hz  
FIDRES 0.908261 Hz  
AQ 1.1010048 sec  
RG 191.37  
DW 16.800 usec  
DE 6.50 usec  
TE 363.0 K  
D1 2.0000000 sec  
D11 0.0300000 sec  
TDC 1  
SFO1 125.7703643 MHz  
NUC1 13C  
P1 10.00 usec  
PLW1 76.0000000 W  
SFO2 500.1320035 MHz  
NUC2 1H  
CPDPRG12 waltz16  
PCPD2 80.00 usec  
PLW2 20.5000000 W  
PLW12 0.3203100 W  
PLW13 0.1611100 W

F2 - Processing parameters  
SI 32768  
SF 125.7577885 MHz  
WDW EM  
SSB 0  
LB 1.00 Hz  
GB 0  
PC 1.40

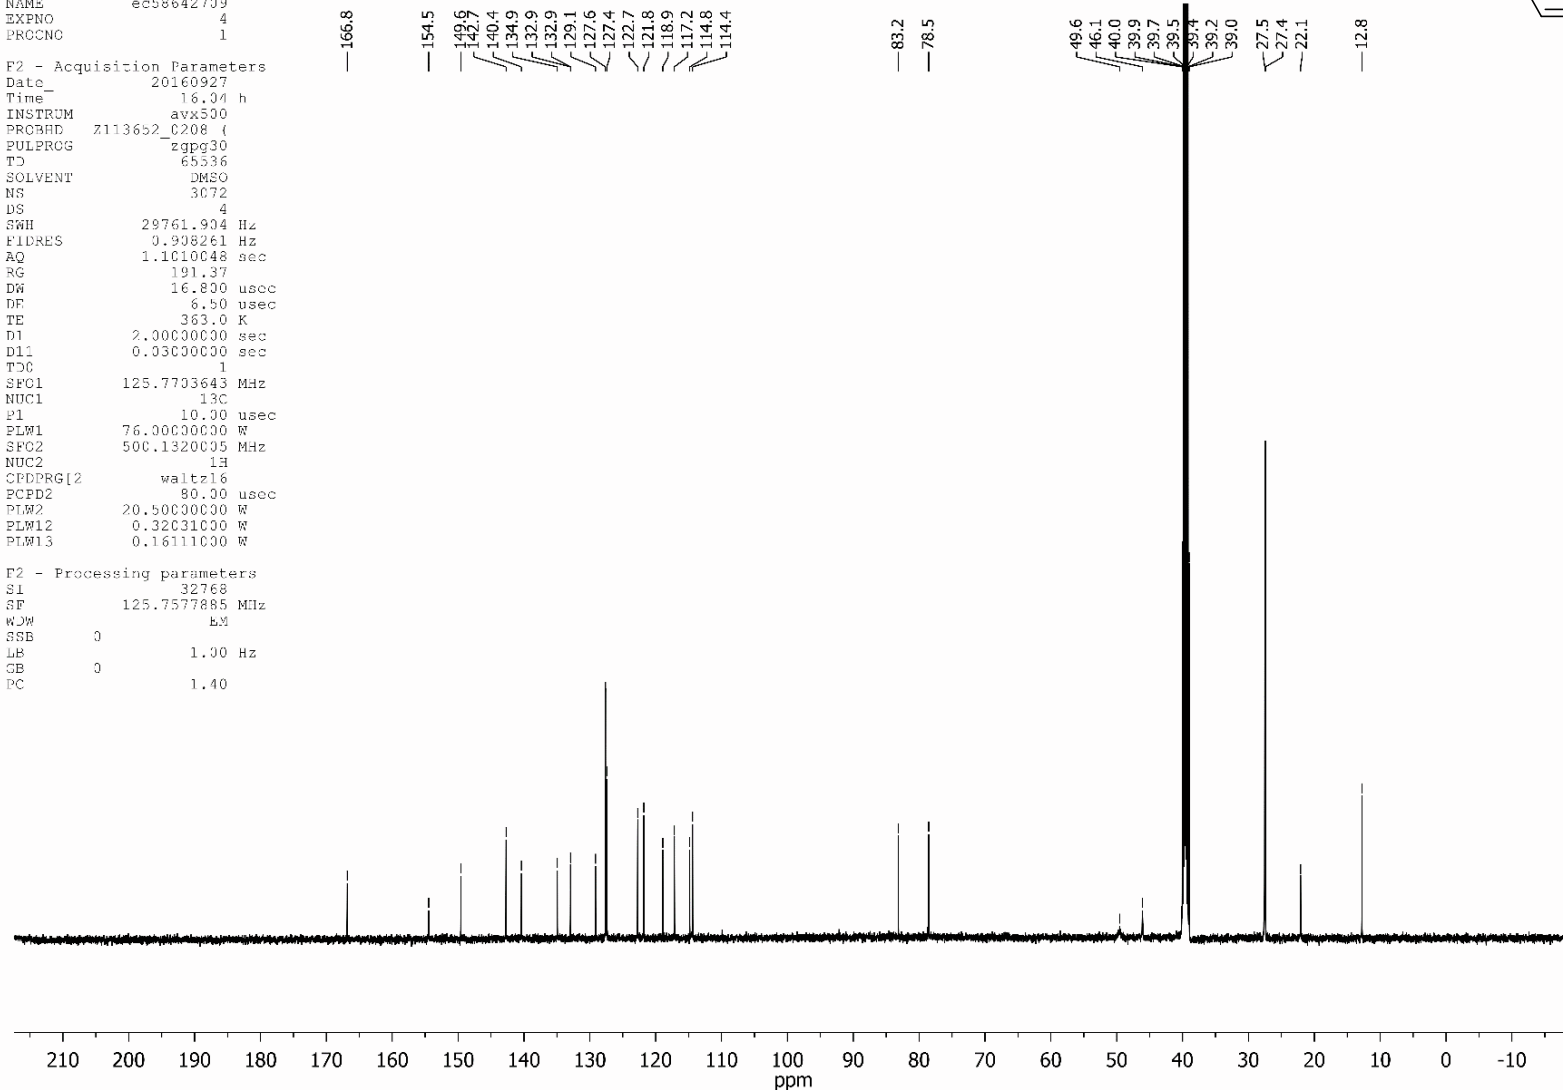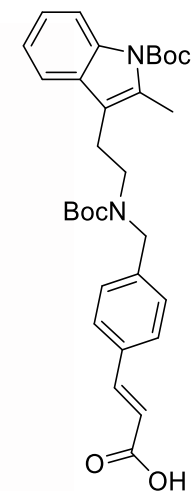

*N,N*-Di-Boc-*O*-benzyl-Panobinostat (**6**)

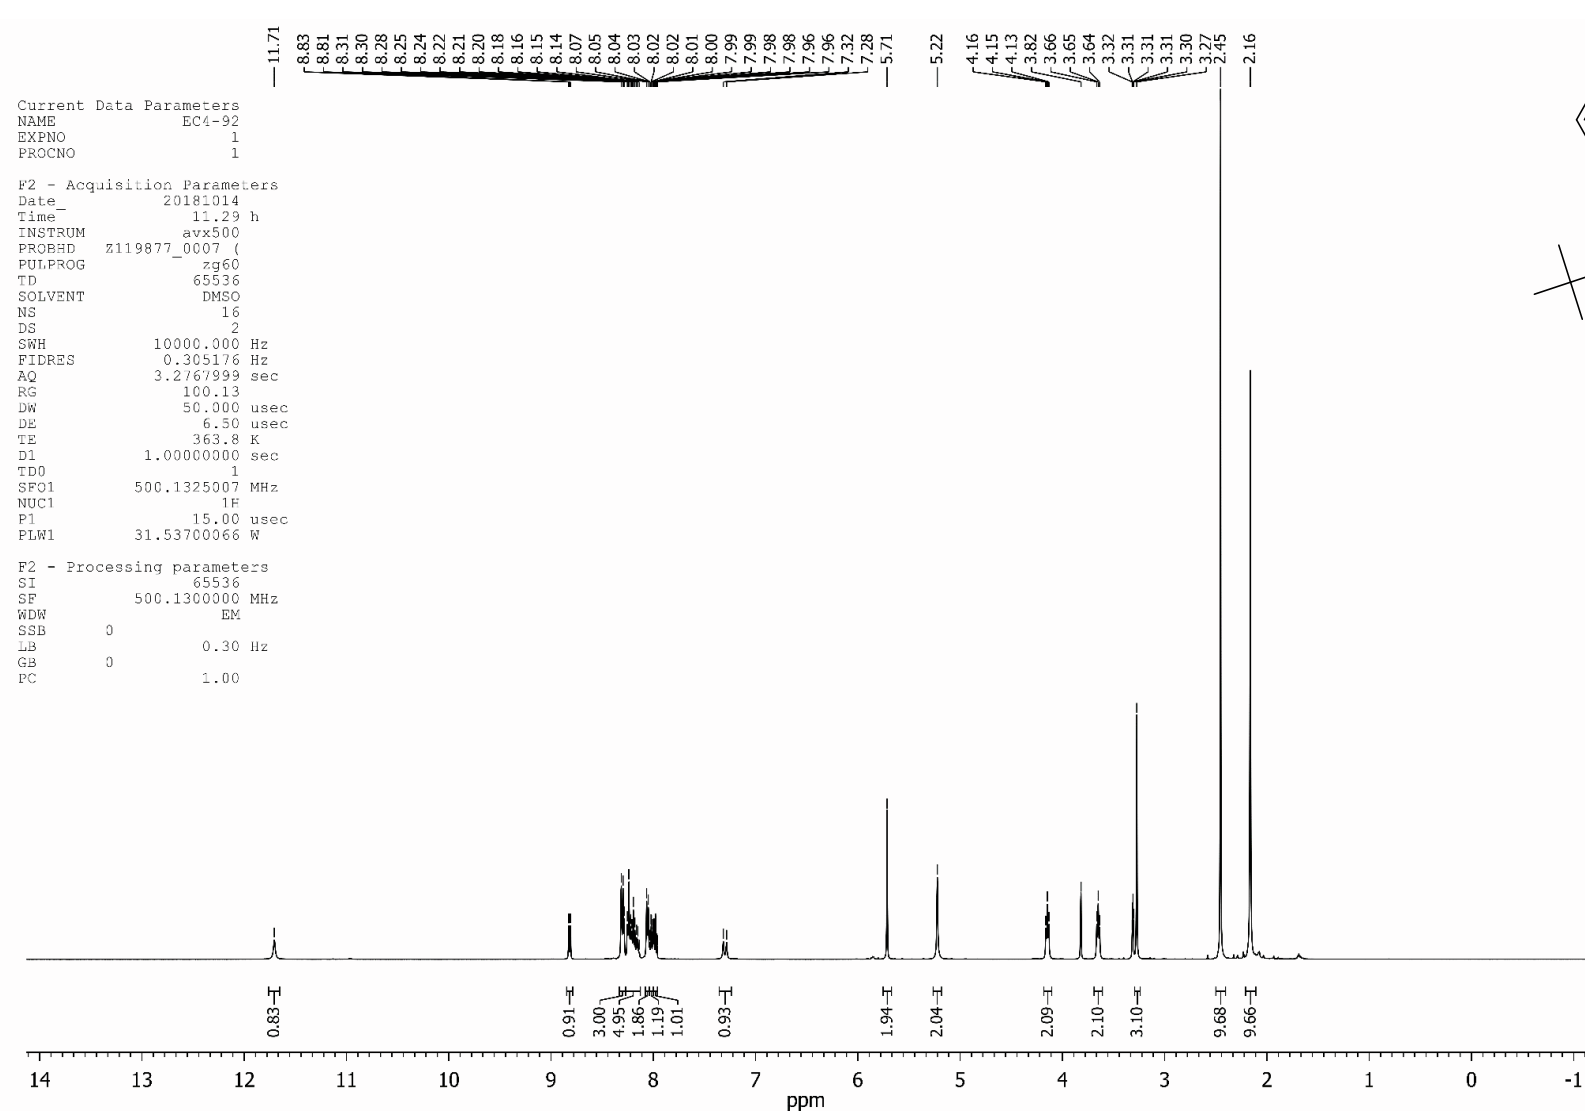

*N,N*-DiBoc-*O*-benzyl-Panobinostat (**6**)

Current Data Parameters  
NAME EC4-92  
EXPNO 1  
PROCNO 1

F2 - Acquisition Parameters  
Date\_ 20181014  
Time 14.16 h  
INSTRUM avx500  
PROBHD Z119877\_0001 (   
PULPROG zgpg30  
TD 65536  
SOLVENT DMSO  
NS 2048  
DS 4  
SWH 29761.904 Hz  
FIDRES 0.90826 Hz  
AQ 1.1010048 sec  
RG 191.37  
DW 16.800 usec  
DE 6.50 usec  
TE 363.0 K  
D1 2.0000000 sec  
D11 0.0300000 sec  
TD0 -  
SFO1 125.7703643 MHz  
NUC1 13C  
P1 10.00 usec  
PLW1 46.89899826 W  
SFO2 500.1320005 MHz  
NUC2 1H  
CPDPRG2 waltz16  
PCPD2 80.00 usec  
PLW2 31.53700066 W  
PLW12 1.12411702 W  
PLW13 0.56340772 W

F2 - Processing parameters  
S1 32768  
SF 125.7577885 MHz  
WDW no  
SSB 0  
LB 0 Hz  
GB 0  
PC 1.00

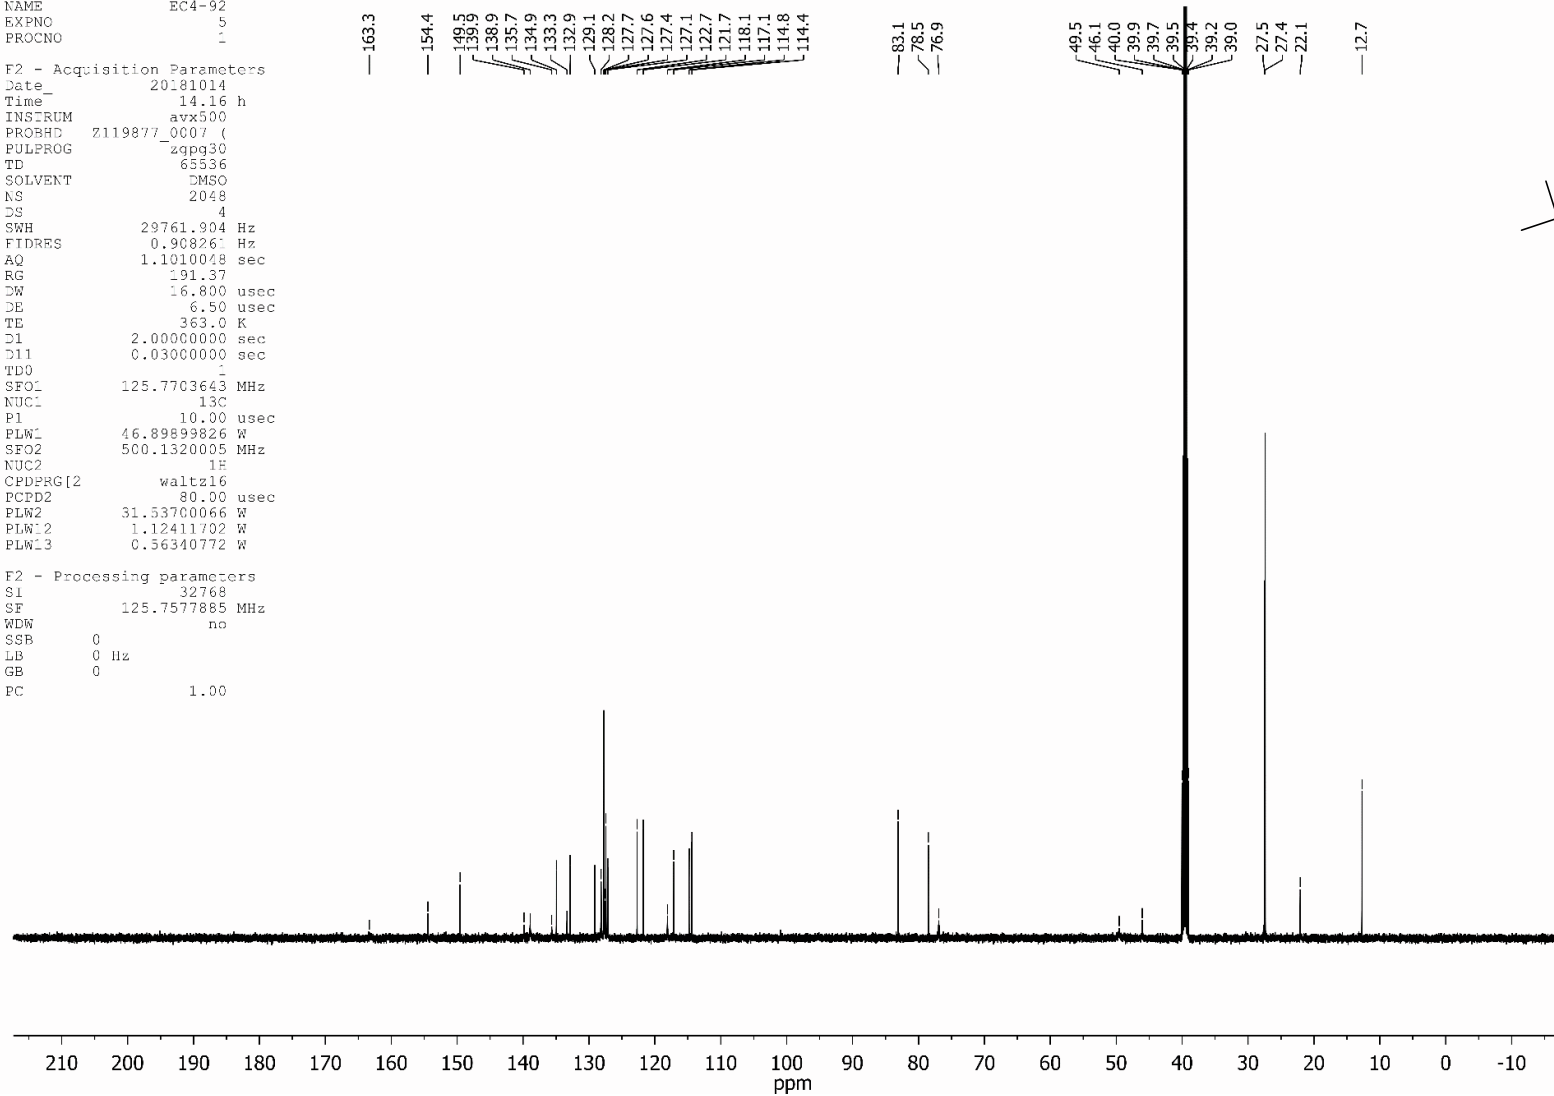

*N,N*-Di-Boc-*O*-benzyl-Panobinostat (**6**)

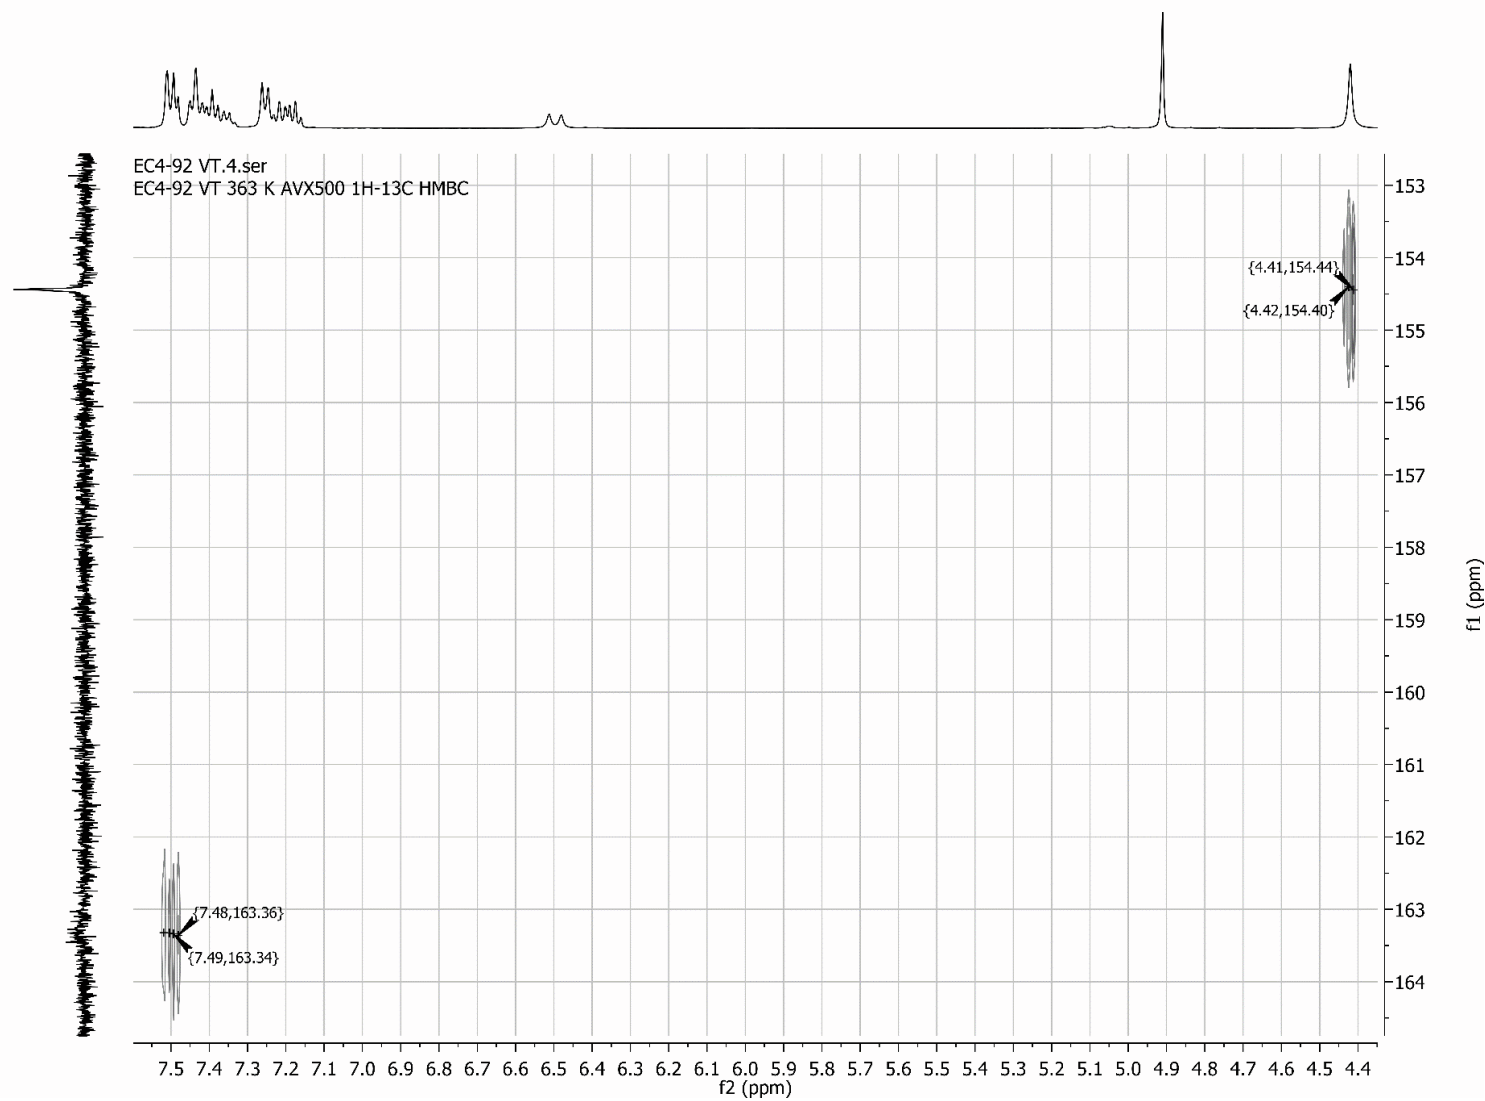

*N,N*-Di-Boc-*O*-(4-nitrobenzyl)-Panobinostat (**7**)

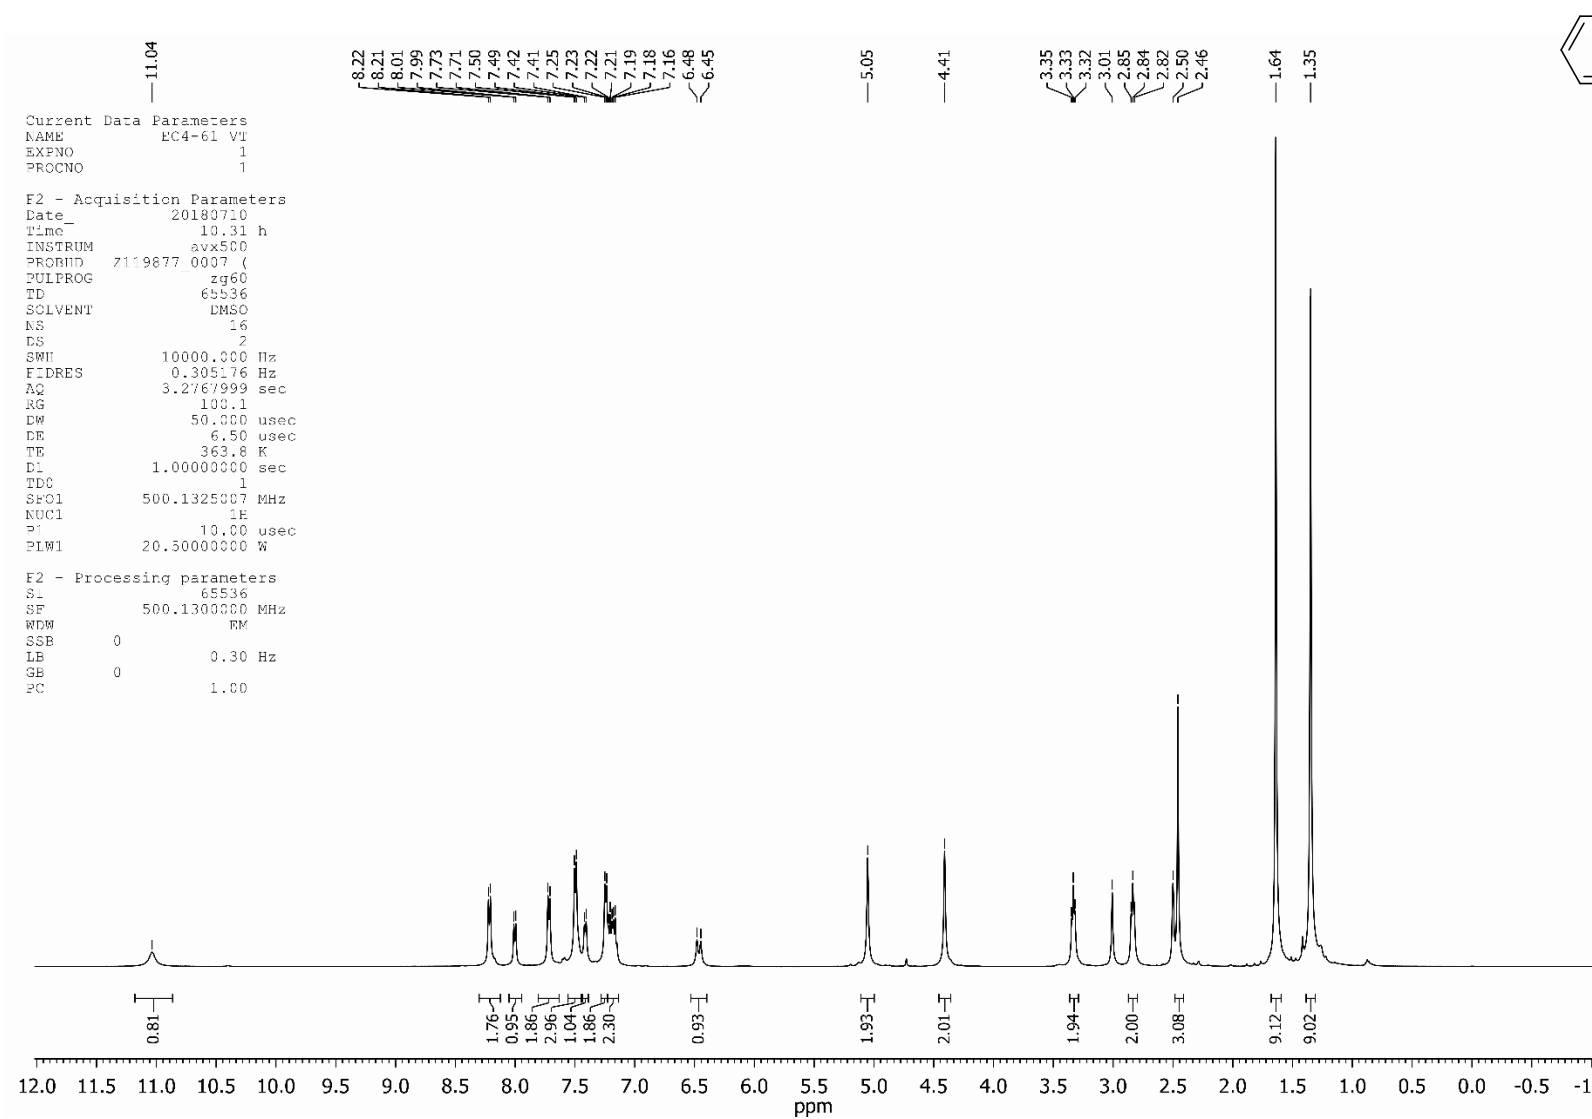

*N,N*-Di-Boc-*O*-(4-nitrobenzyl)-Panobinostat (**7**)

```
Current Data Parameters
NAME          EC4-61 VI
EXPNO         5
PROCNO        1
```

```

P2 - Acquisition Parameters
Date_      20180710
Time_      13.36 h
INSTRUM    avx500
PROBHD     Z118977_0007 f
PULPRG     zgpg30
TD         65536
SOLVENT    DMSO
NS         1826
DS         4
SWH        29761.904 Hz
FIDRES     0.908261 Hz
AQ         1.1010048 sec
RG         191.37
DW         16.800 usec
DE         6.50 usec
TE         363.0 K
D1         2.3003000 sec
d11        0.3003000 sec
T2        206
SFG1       125.7703643 MHz
NUC1       13C
P1         10.00 usec
PLW1       76.00000000 W
SFG2       500.1320035 MHz
NUC2       1H
CPDPRG2    wait216
PCPD2      80.00 usec
PLW2       20.50000000 W
PLW12     0.32031000 W
PLW13     0.16110000 W

```

```

F2 - Processing parameters
SI                      32768
SF                      125.7577885 MHz
WDW                      EM
SSB                      0
LB                      1.00 Hz
CB                      0
PC                      1.40

```

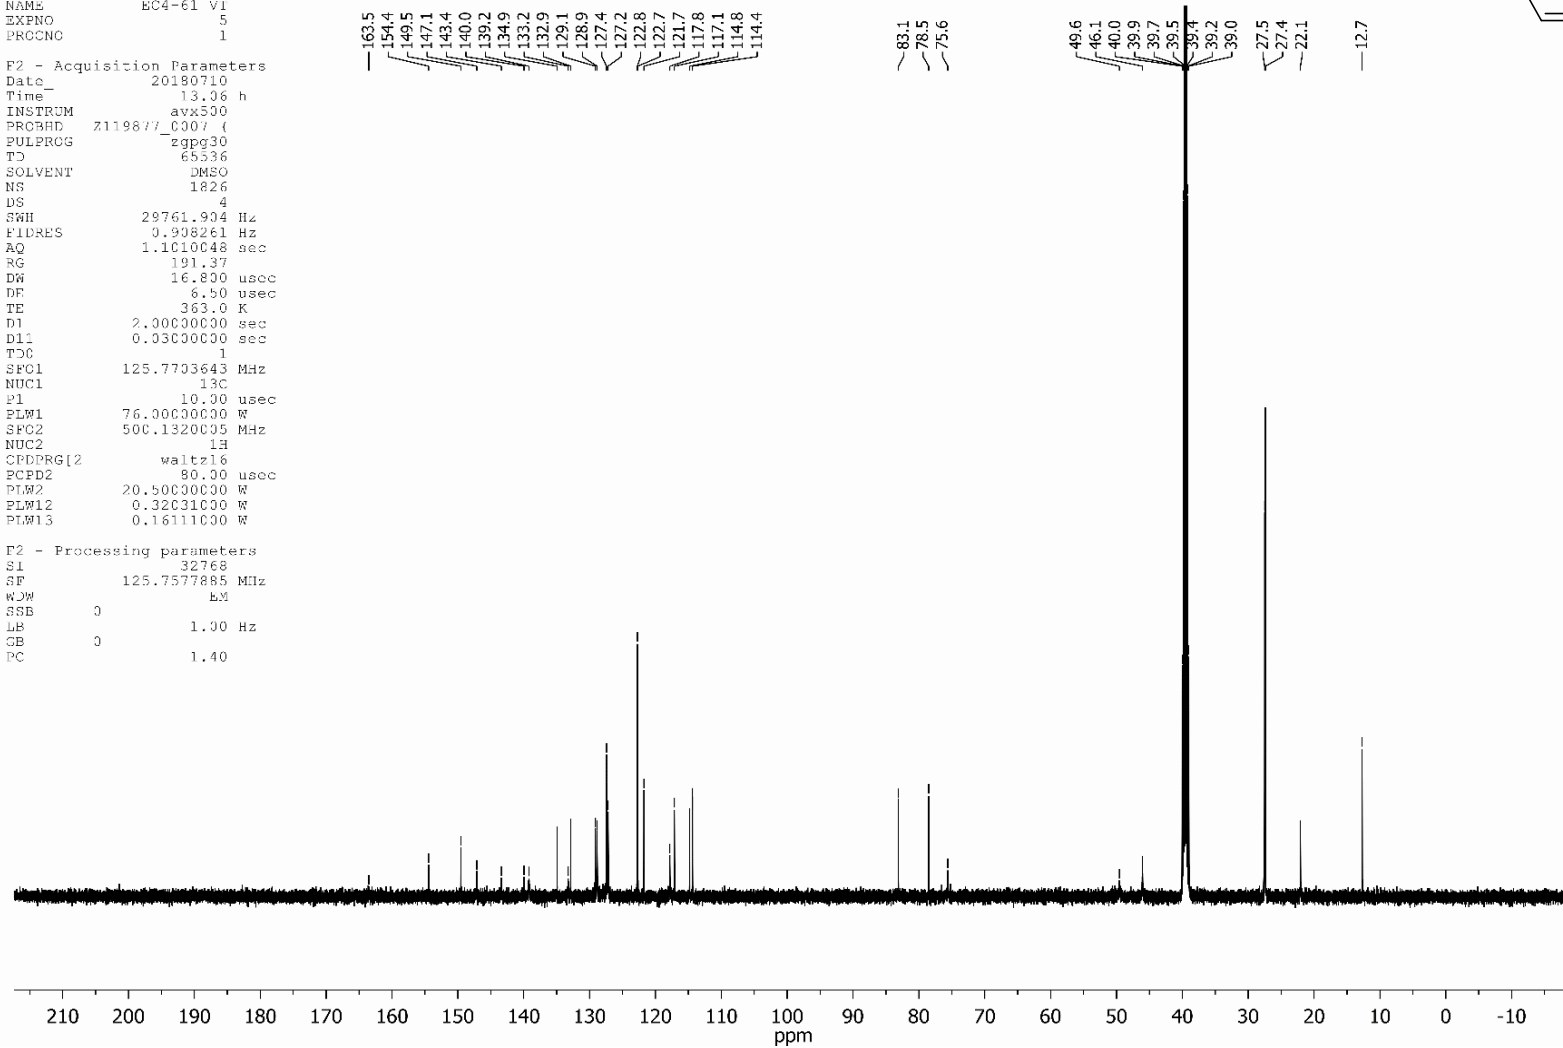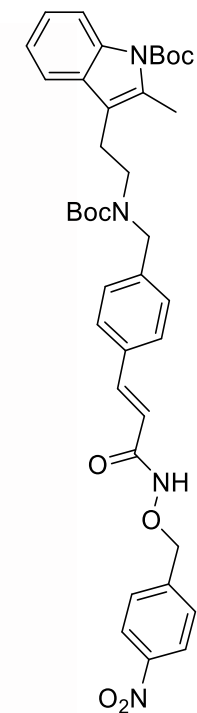

*N,N*-Di-Boc-O-(4-nitrobenzyl)-Panobinostat (**7**)

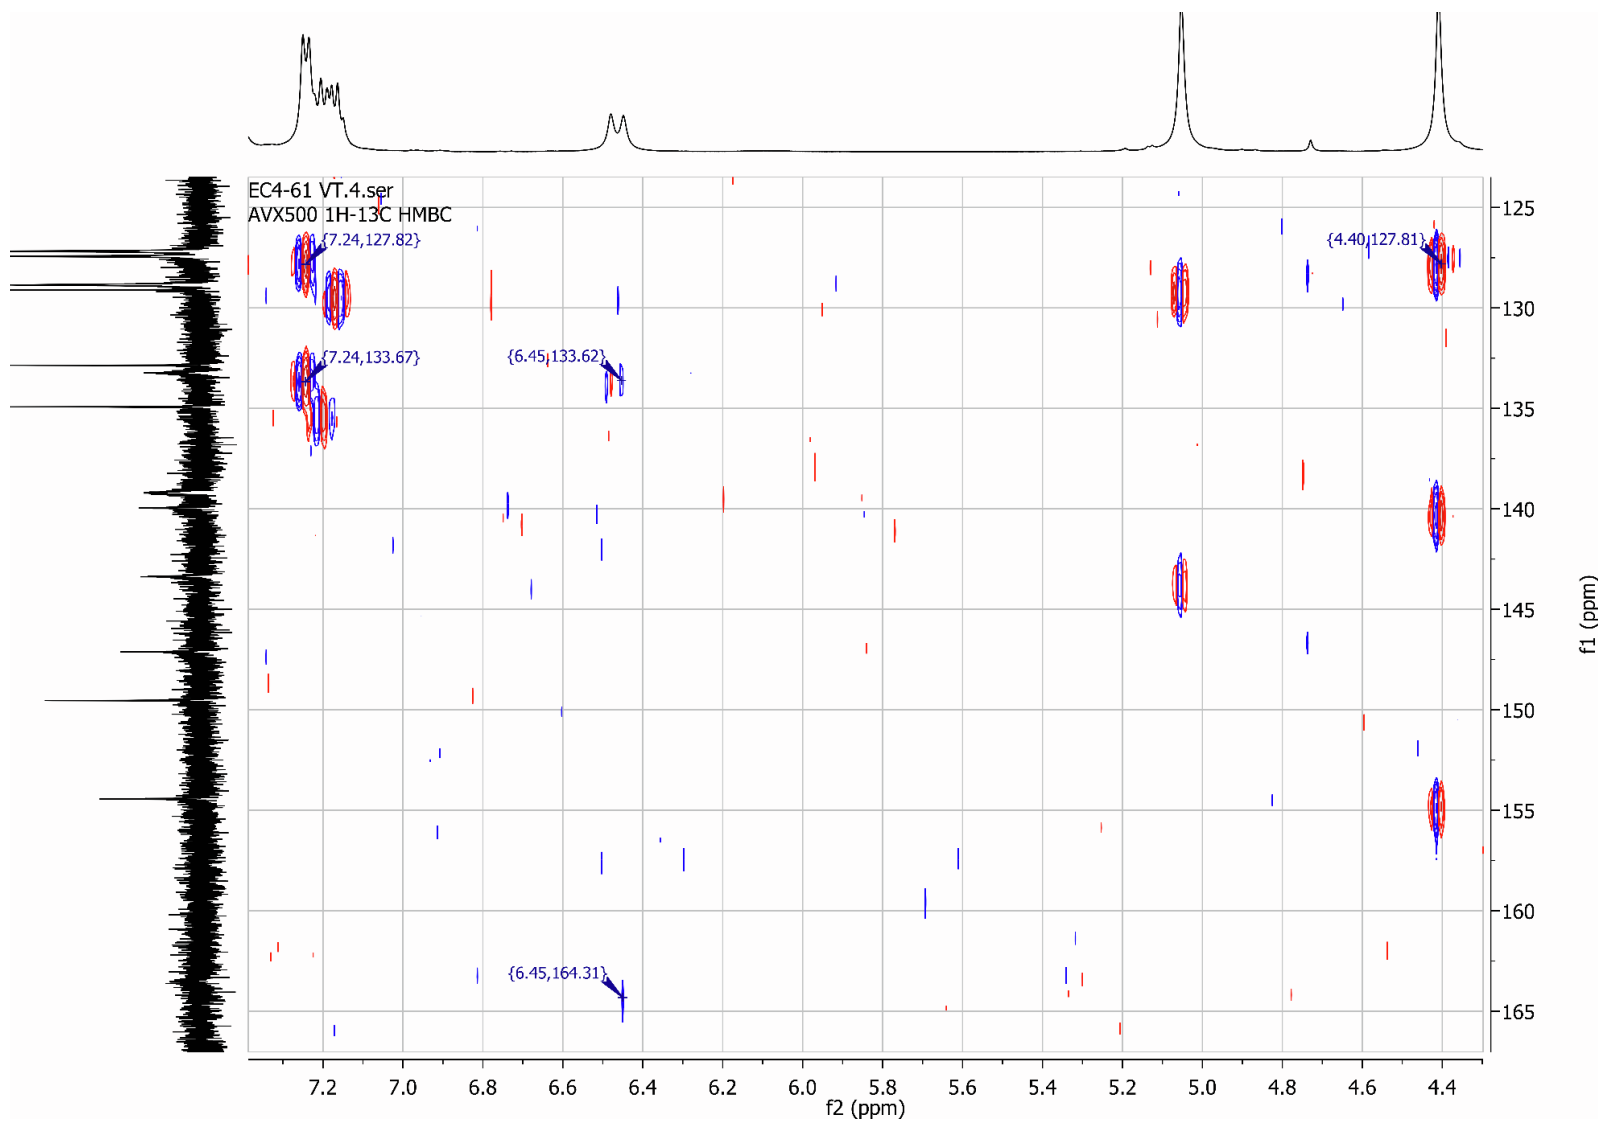

*N,N*-Di-Boc-*O*-(4-nitrobenzyl)-Panobinostat (**7**)

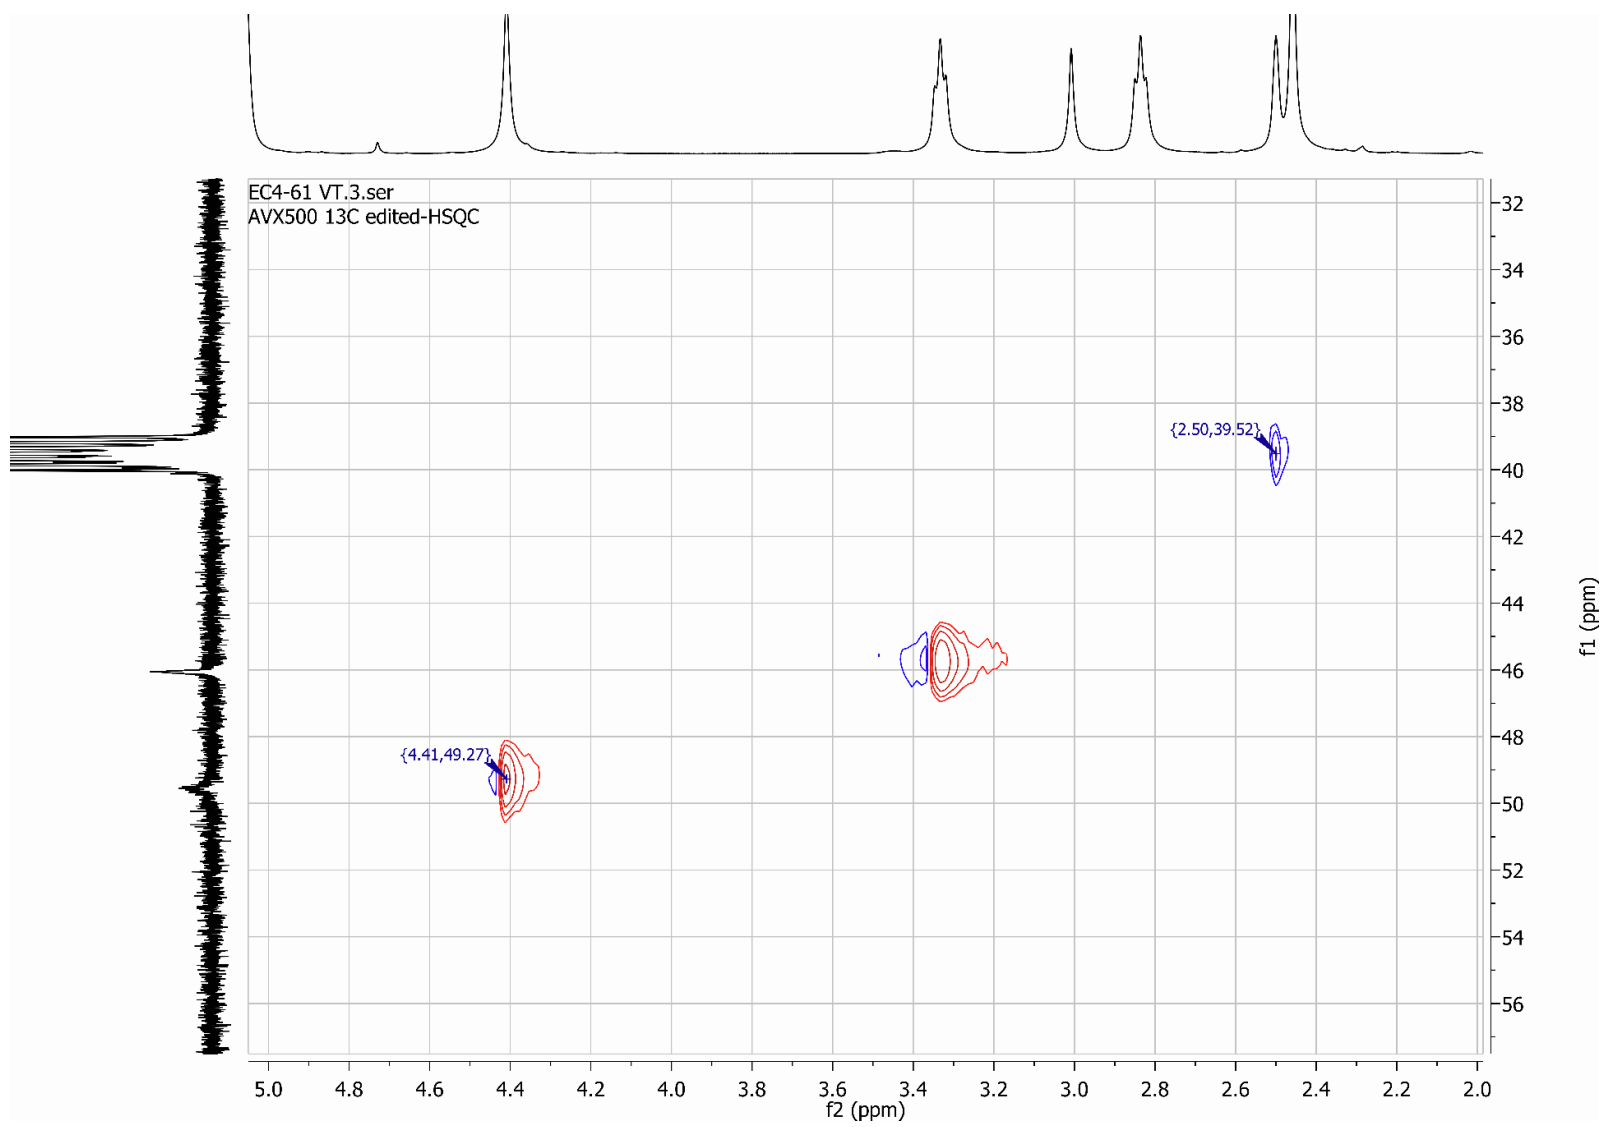



*N,N*-Di-Boc-*O*-(2-nitrothiophen-5-yl)methyl)-Panobinostat (**8**)

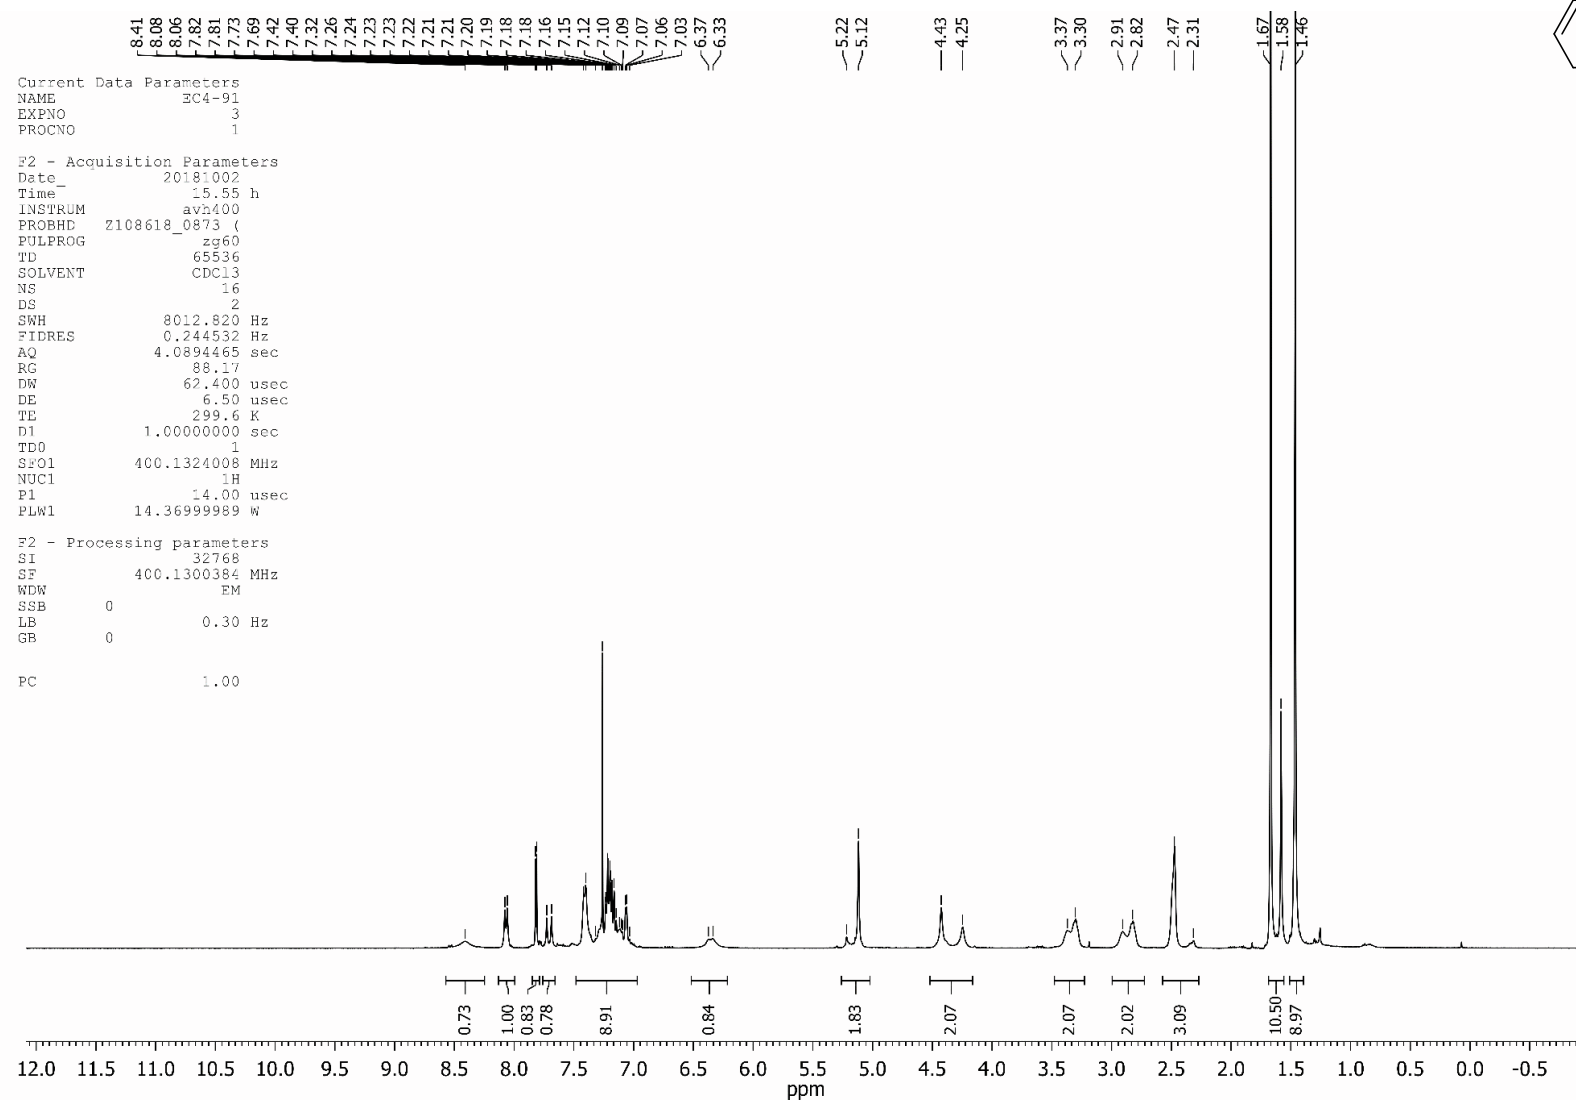

*N,N*-Di-Boc-*O*-(6-nitroquinolin-5-yl)methyl)-Panobinostat (**9**)

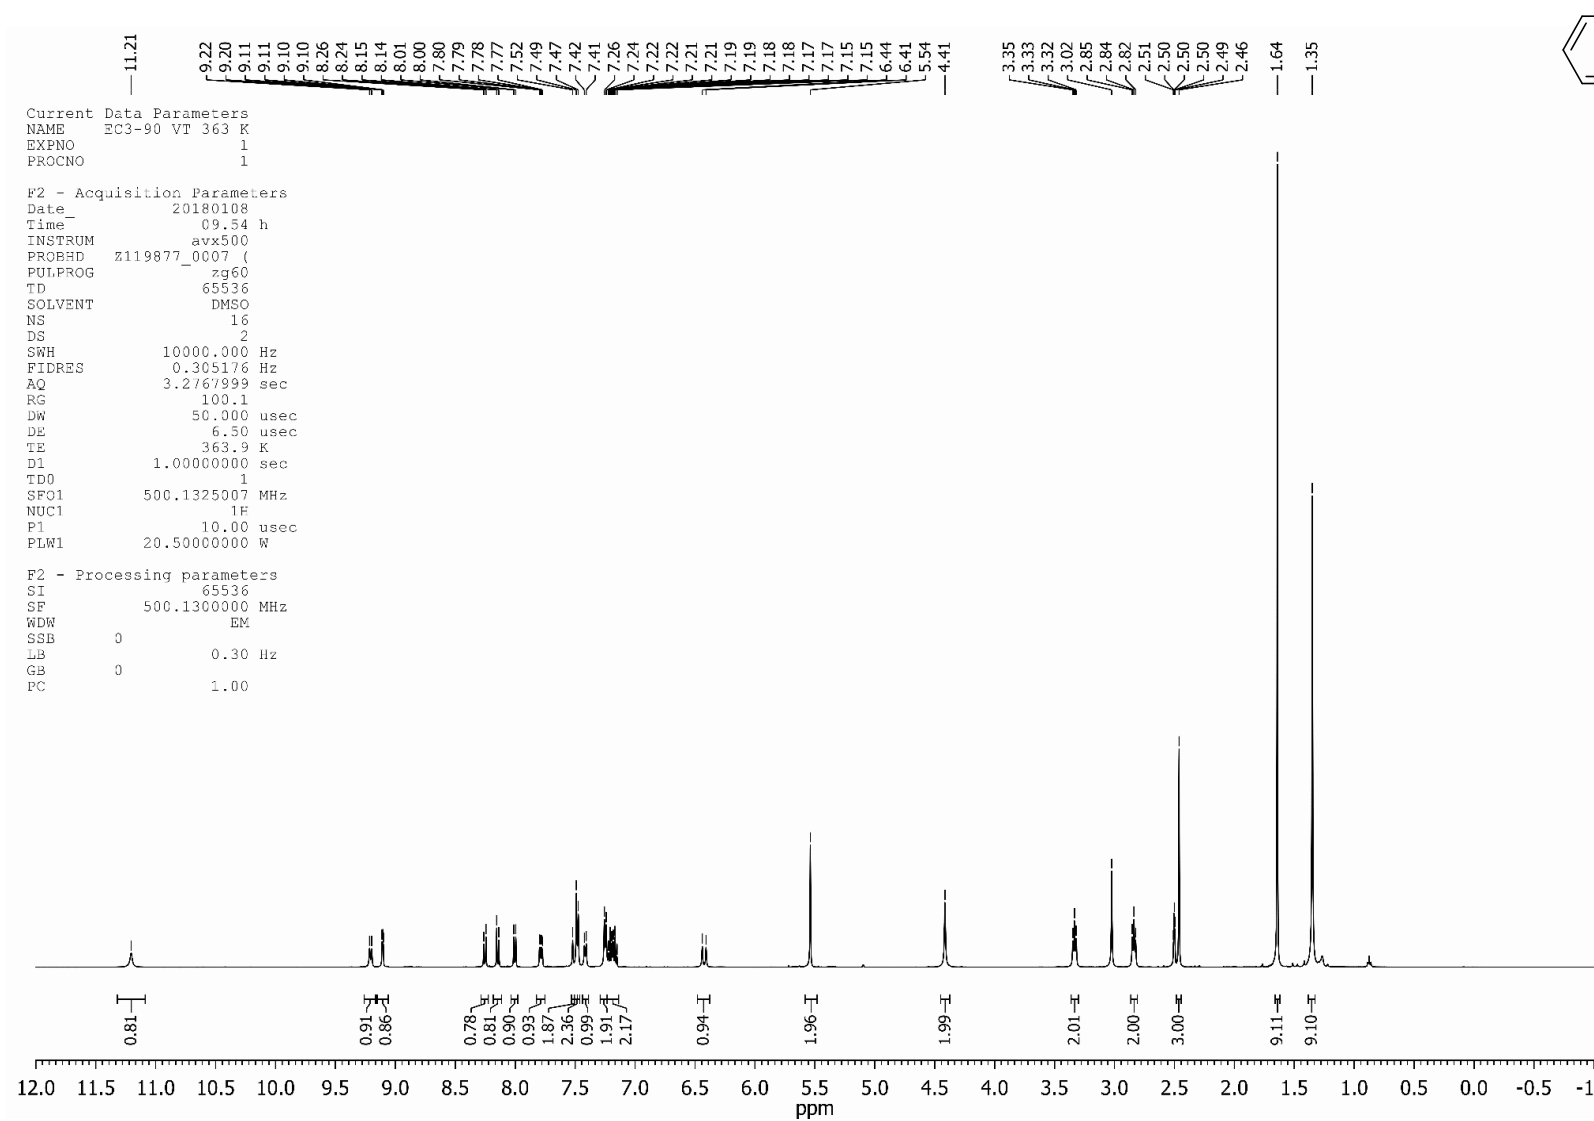

*N,N*-Di-Boc-*O*-((6-nitroquinolin-5-yl)methyl)-Panobinostat (**9**)

Current Data Parameters  
NAME EC3-90 V  
EXPNO 3  
PROCNO 1

F2 - Acquisition Parameters  
Date\_ 20180801  
Time\_ 12:24 h  
INSTRUM avx500  
PROBHD Z119877\_0007 (   
PULPROG zgpg30  
TD 65536  
SOLVENT DMSO  
NS 2048  
DS 4  
SWH 29761.904 Hz  
FIDRES 0.908261 Hz  
AQ 1.1010048 sec  
RG 191.37  
DW 16.800 usec  
DE 6.50 usec  
TE 363.0 K  
D1 2.00000000 sec  
D11 0.03000000 sec  
TD0 -  
SFO1 125.7703643 MHz  
NUC1 13C  
P1 10.00 usec  
PLW1 76.00000000 W  
SFO2 500.1320005 MHz  
NUC2 1H  
CPDPRG2 waltz16  
PCPD2 80.00 usec  
PLW2 20.50000000 W  
PLW12 0.32031000 W  
PLW13 0.16111000 W

F2 - Processing parameters  
SI 32768  
SF 125.7577885 MHz  
WDW EM  
SSB 0  
LB 1.00 Hz  
GB 0  
PC 1.40

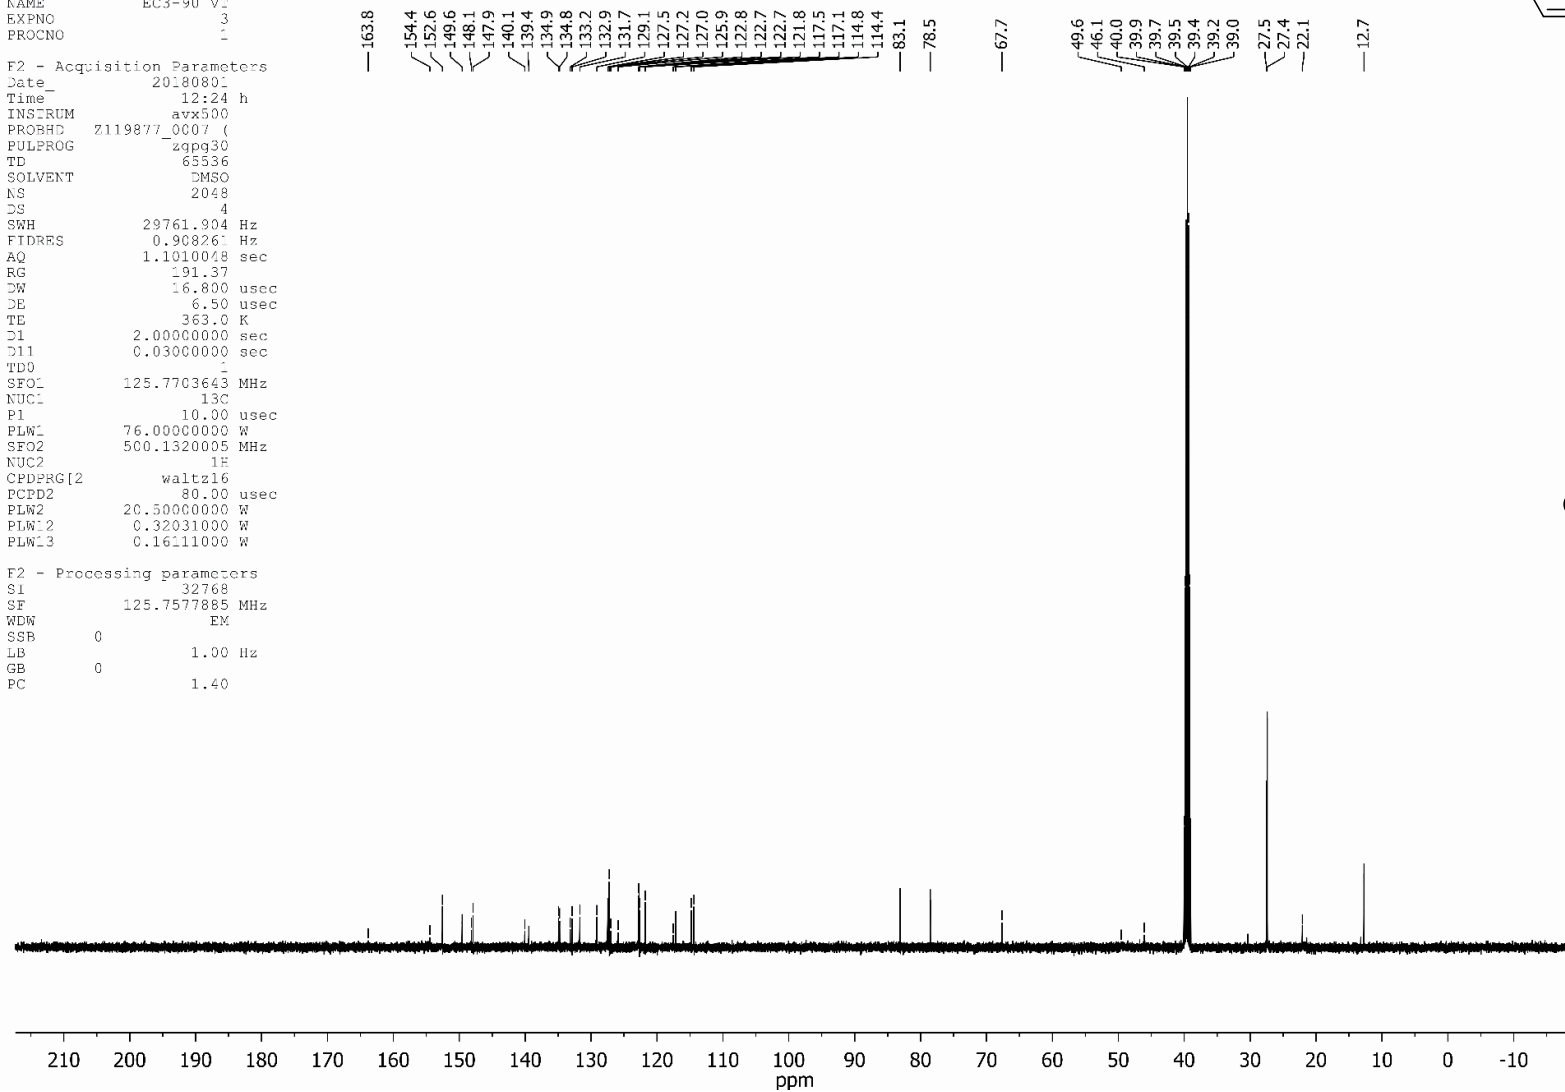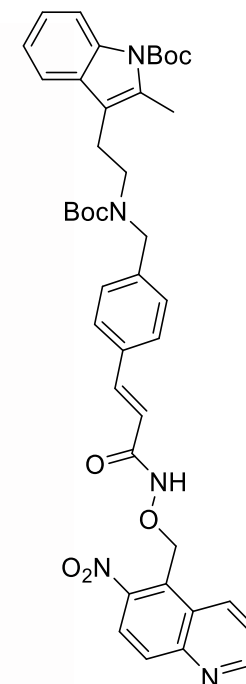

*N,N*-Di-Boc-*O*-(6-nitroquinolin-5-yl)methyl)-Panobinostat (**9**)

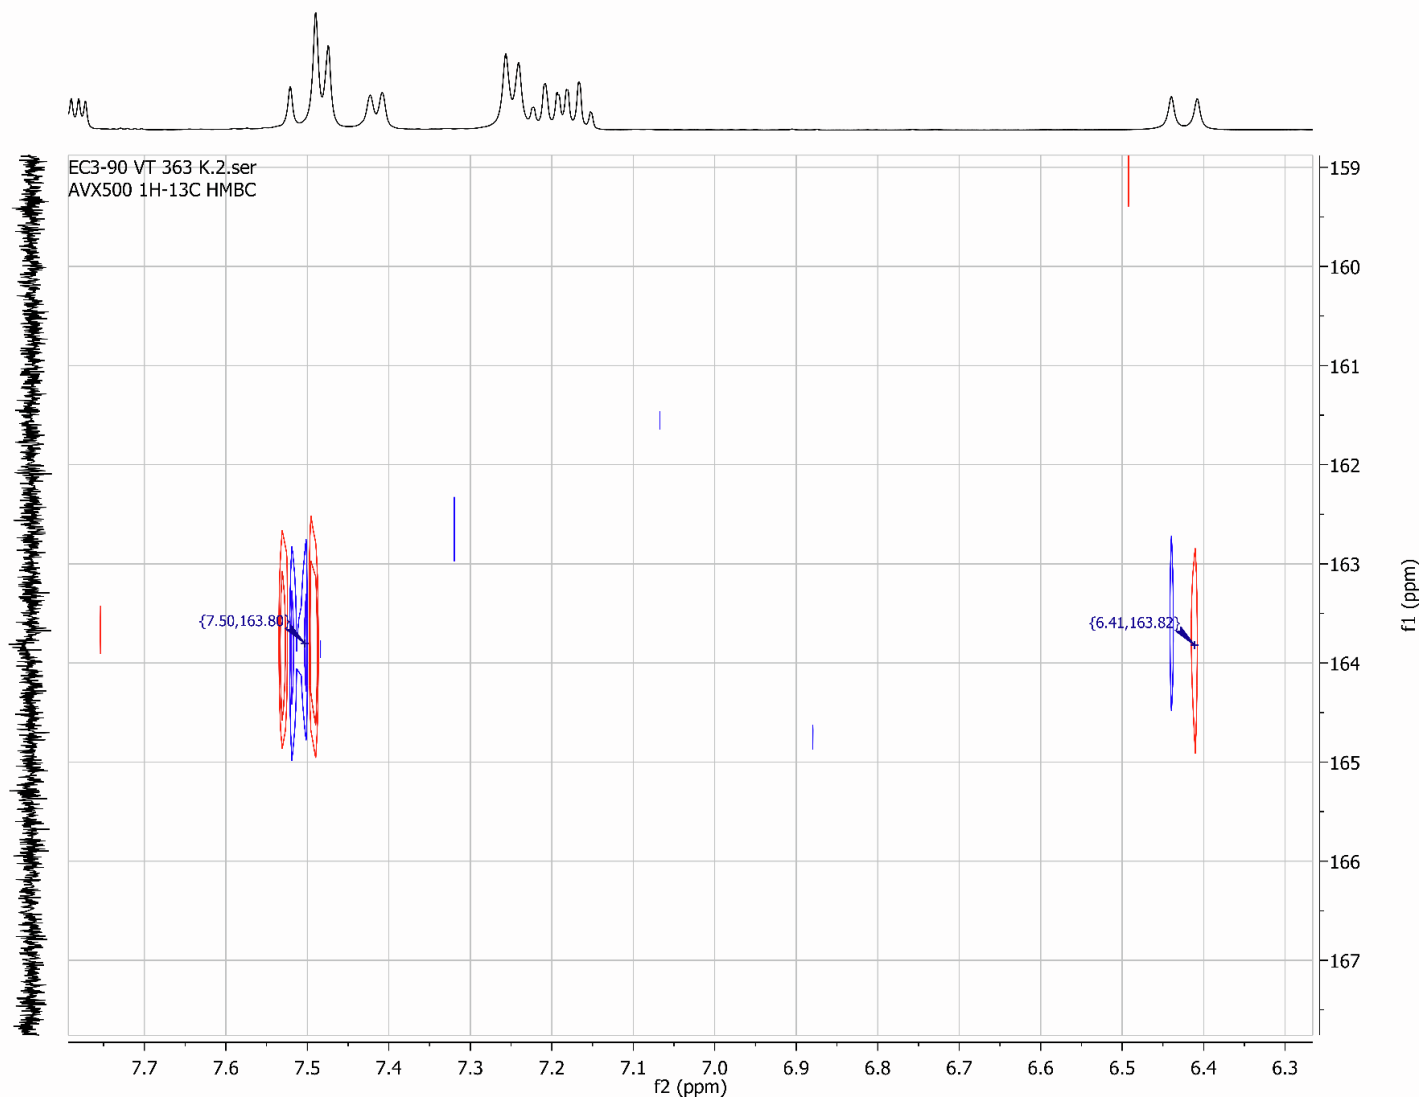

*N,N*-Di-Boc-*O*-((6-nitroquinolin-5-yl)methyl)-Panobinostat (**9**)

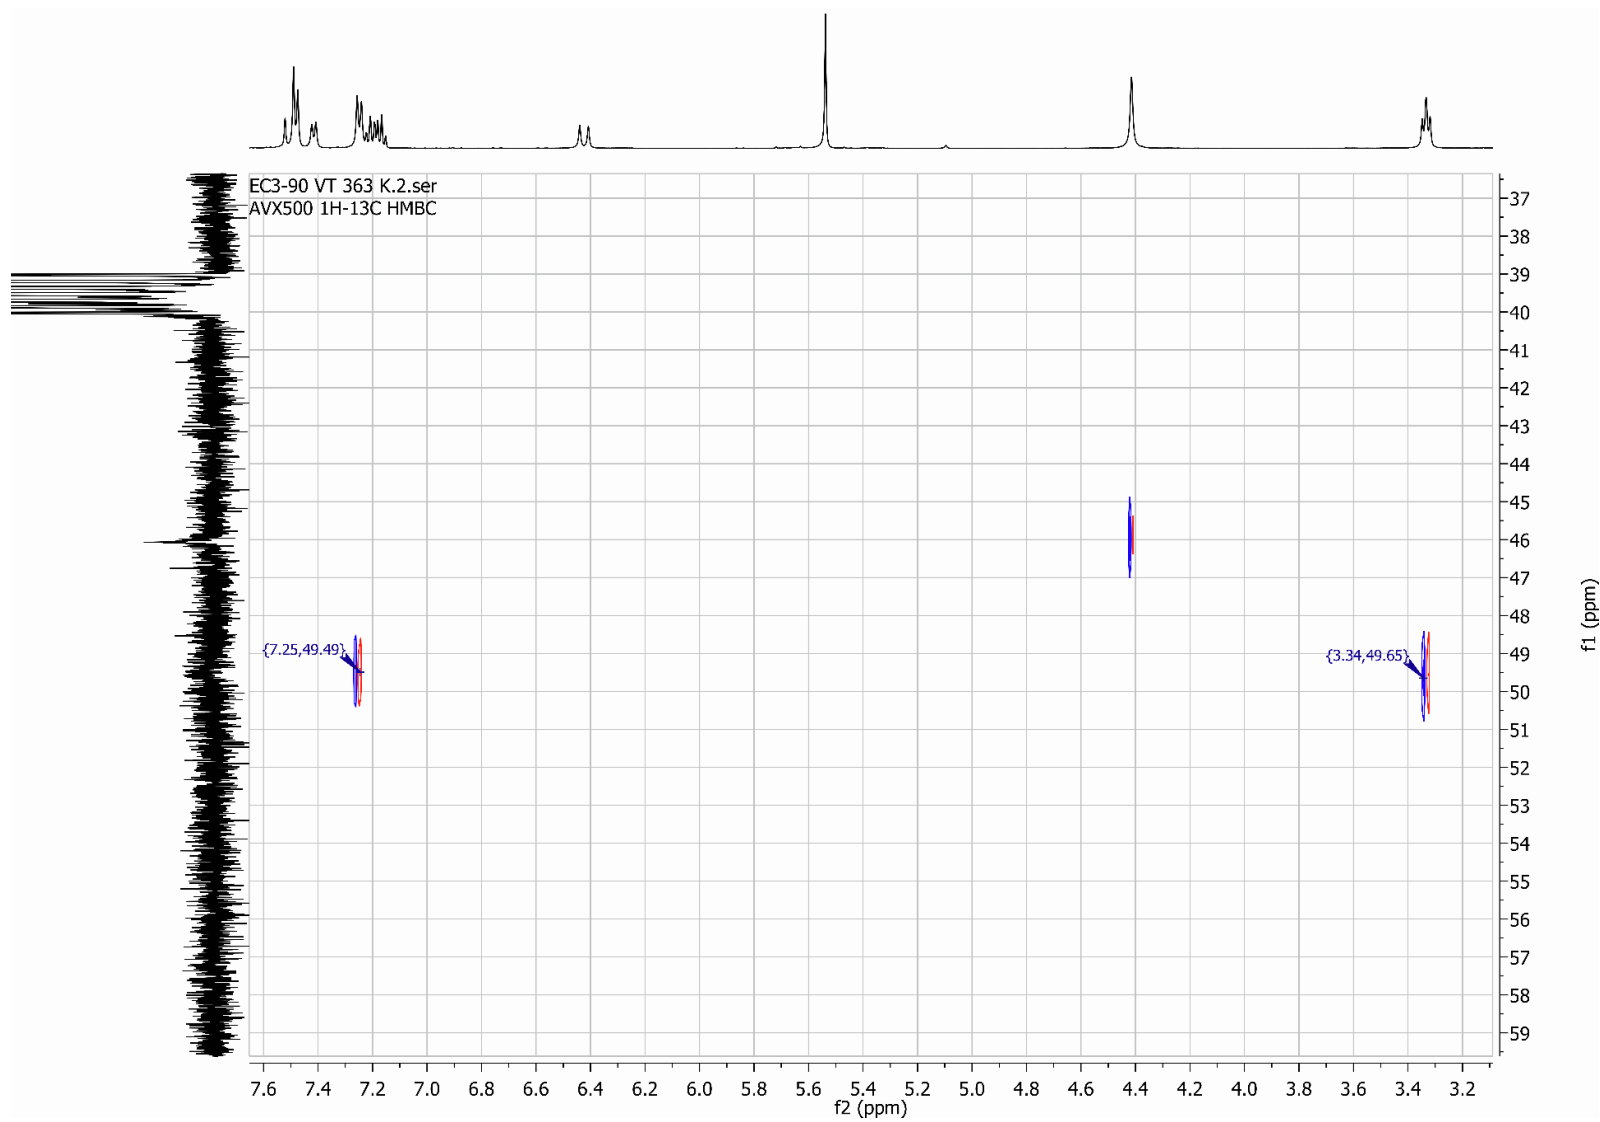

*N,N*-Di-Boc-O-(1-methyl-2-nitroimidazol-5-yl)methyl)-panobinostat

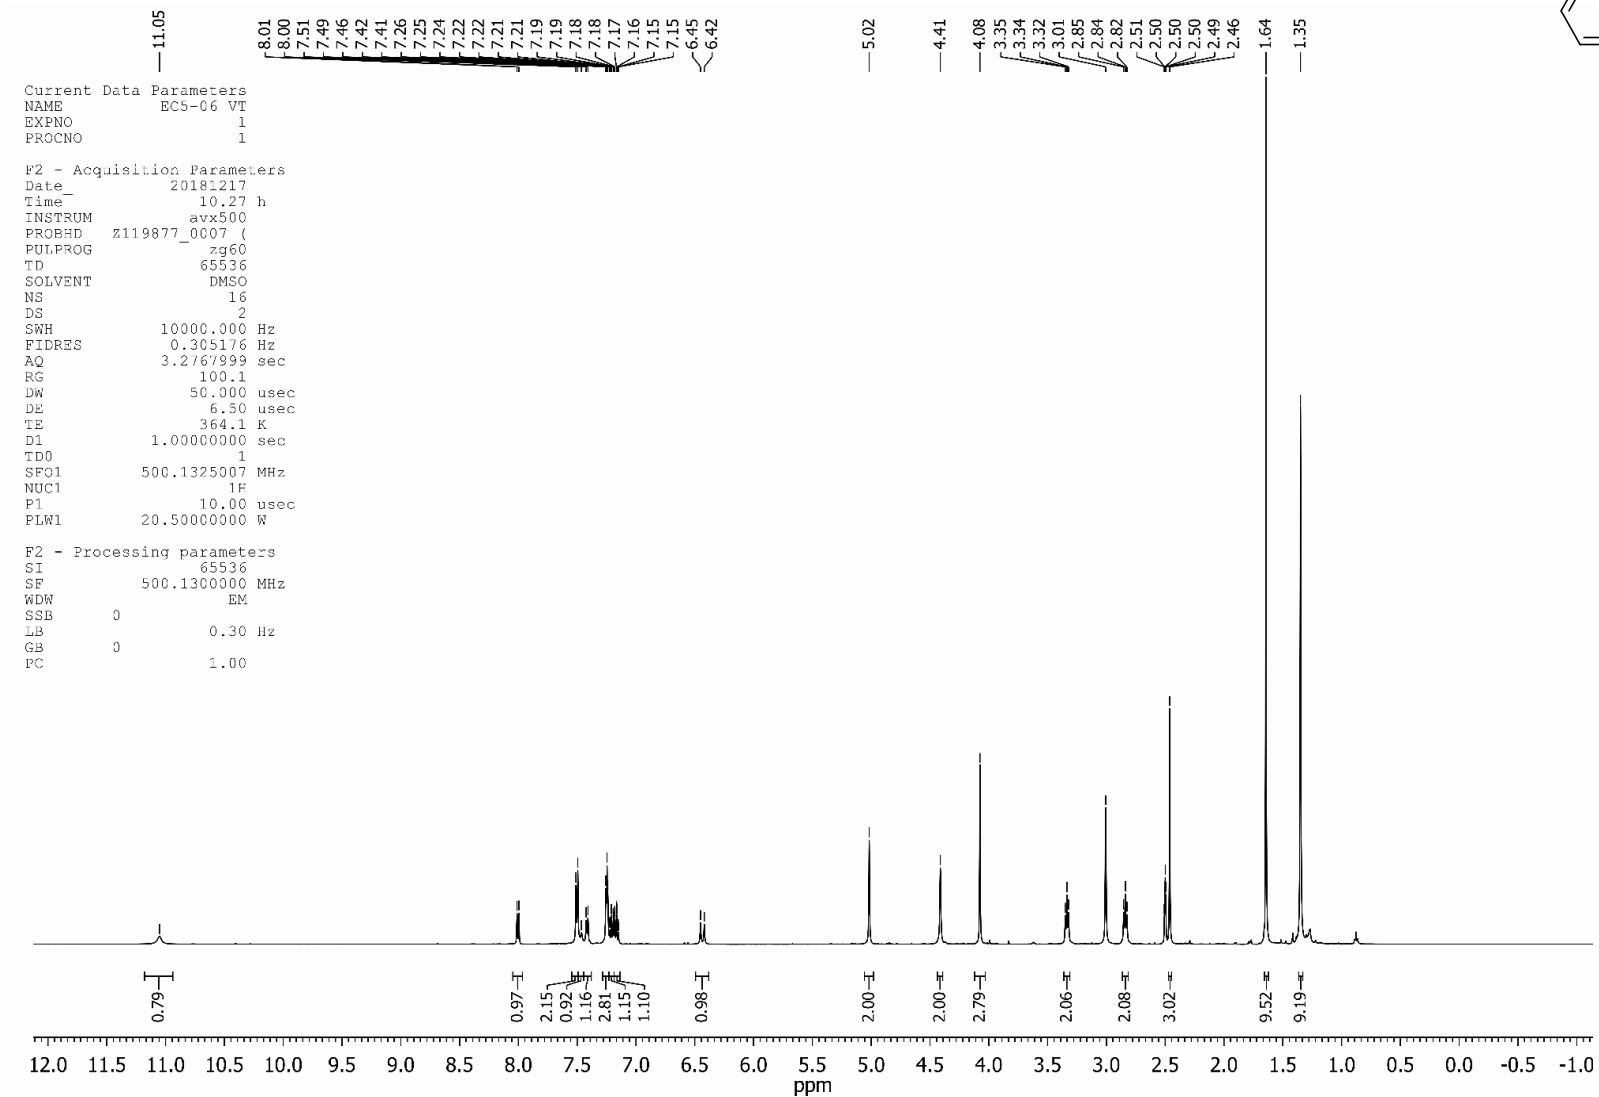

*N,N*-Di-Boc-*O*-((1-methyl-2-nitroimidazol-5-yl)methyl)-panobinostat

```
Current Data Parameters
NAME          EC5-06 VT
EXPNO          5
PROCNO         1
```

| F2 - Acquisition Parameters |                |      |
|-----------------------------|----------------|------|
| Date_                       | 20181217       |      |
| Time_                       | 12:47 h        |      |
| INSTRUM                     | avx500         |      |
| PROBHD                      | Z119877-0007 Q |      |
| PULPROG                     | zgpg30         |      |
| TD                          | 65536          |      |
| SOLVENT                     | DMSO           |      |
| NS                          | 1551           |      |
| DS                          | 4              |      |
| SWH                         | 29761.904      | Hz   |
| FIDRES                      | 0.908266       | Hz   |
| AQ                          | 1.10100048     | sec  |
| RG                          | 191.37         |      |
| DW                          | 16.800         | usec |
| DE                          | 6.50           | usec |
| TE                          | 363.0          | K    |
| D1                          | 2.00000000     | sec  |
| D11                         | 0.03000000     | sec  |
| TD0                         | -              |      |
| SFO1                        | 125.7703643    | MHz  |
| NUC1                        | 13C            |      |
| P1                          | 10.00          | usec |
| PLW1                        | 76.00000000    | W    |
| SFO2                        | 500.1320005    | MHz  |
| NUC2                        | 1H             |      |
| CPDPRG2                     | waltz16        |      |
| PCPD2                       | 80.00          | usec |
| PLW2                        | 20.50000000    | W    |
| PLW2                        | 0.32031000     | W    |
| PLW3                        | 0.16111000     | W    |

```
F2 - Processing parameters
SI              32768
SF              125.7577885 MHz
WDW              EM
SSB             0
LB              1.00 Hz
GB             0
PC              1.40
```

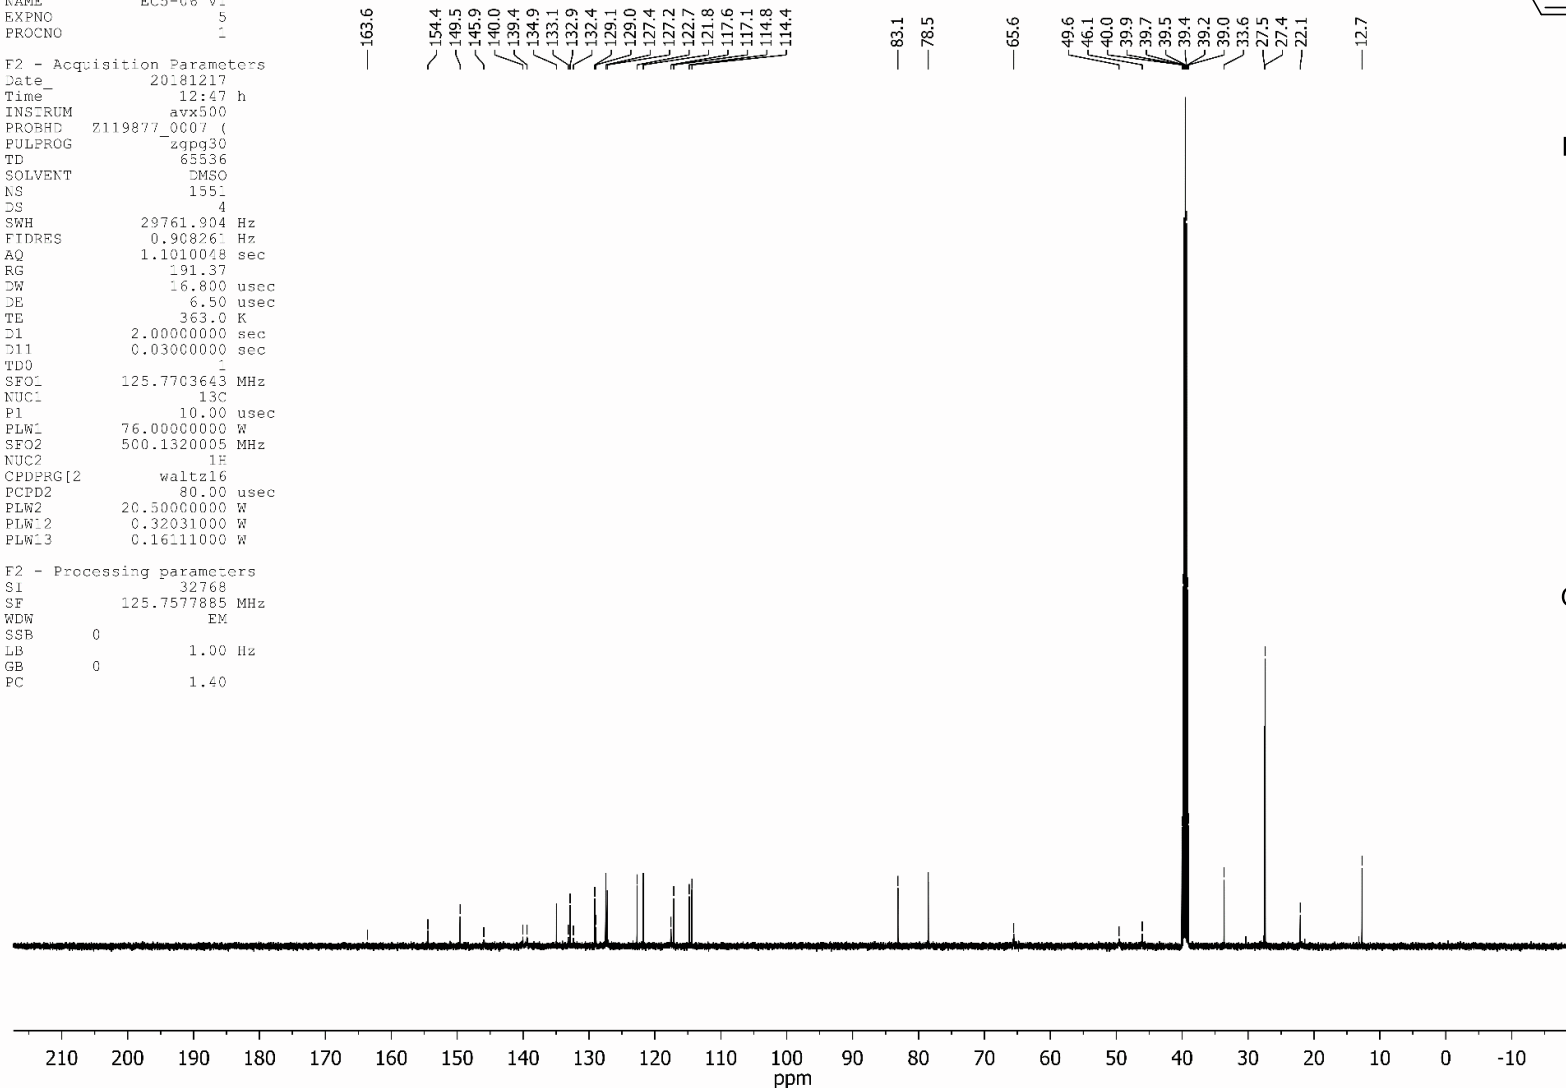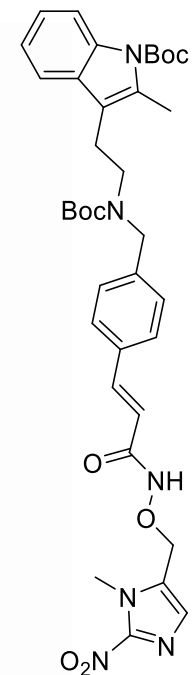

*N,N*-Di-Boc-*O*-((1-methyl-2-nitroimidazol-5-yl)methyl)-panobinostat

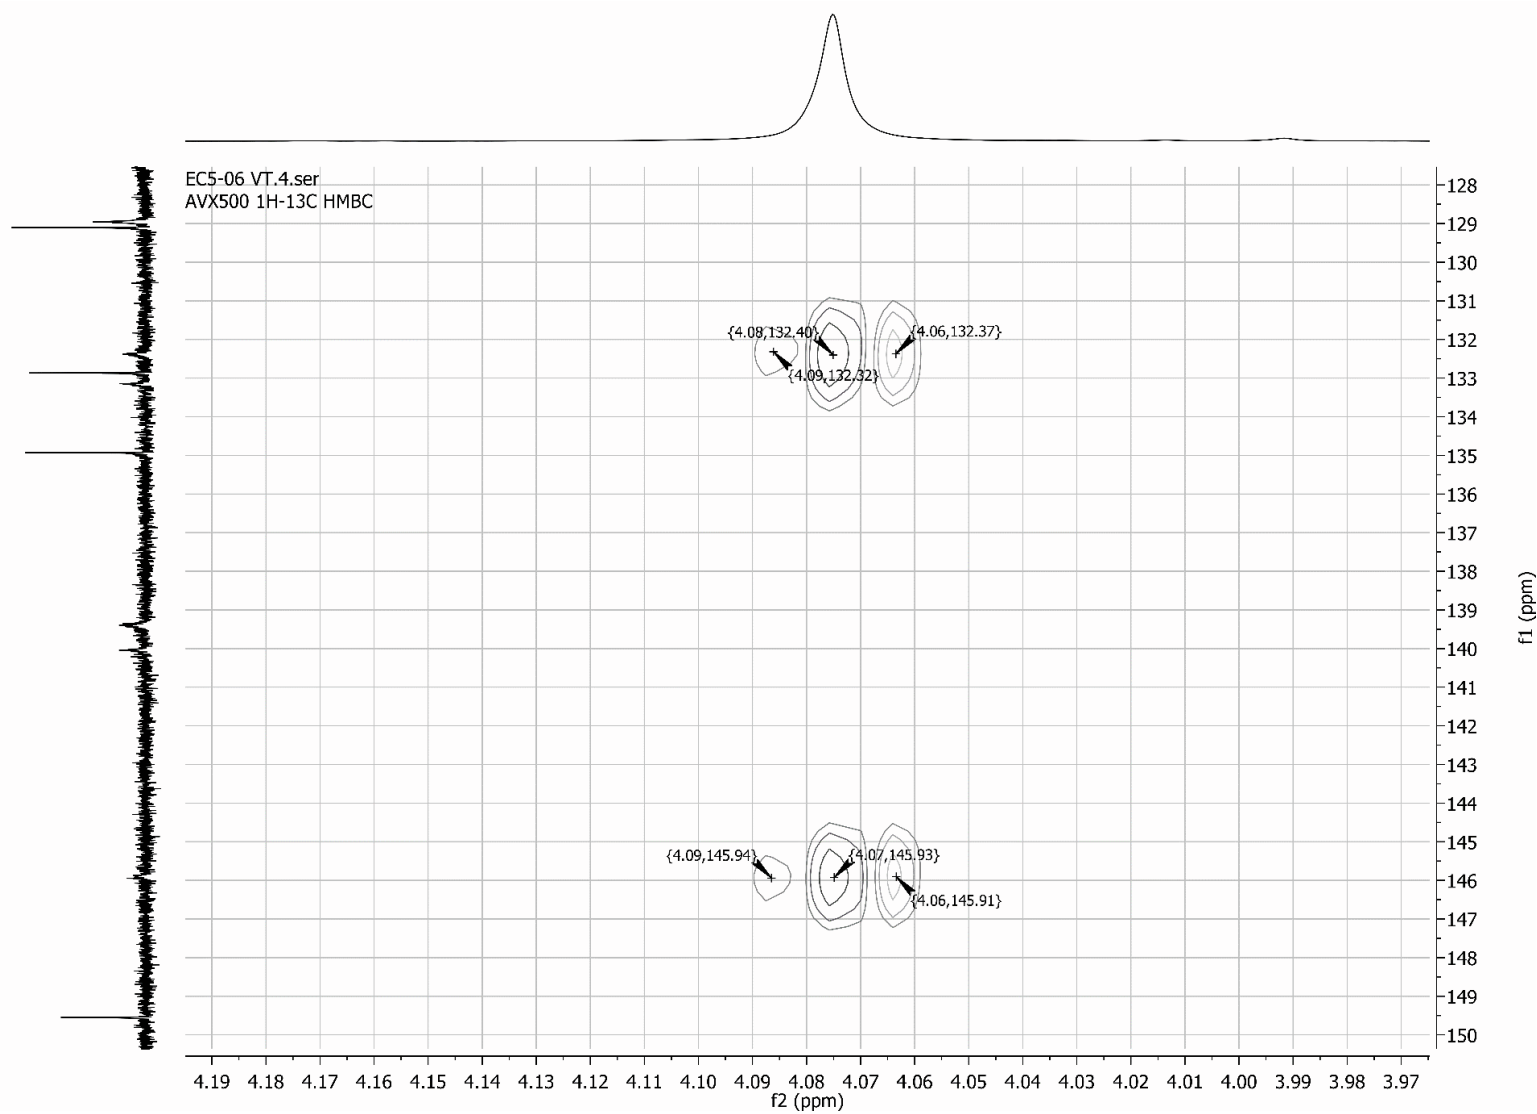



*N,N*-Di-Boc-*O*-((1-methyl-2-nitroimidazol-5-yl)methyl)-panobinostat

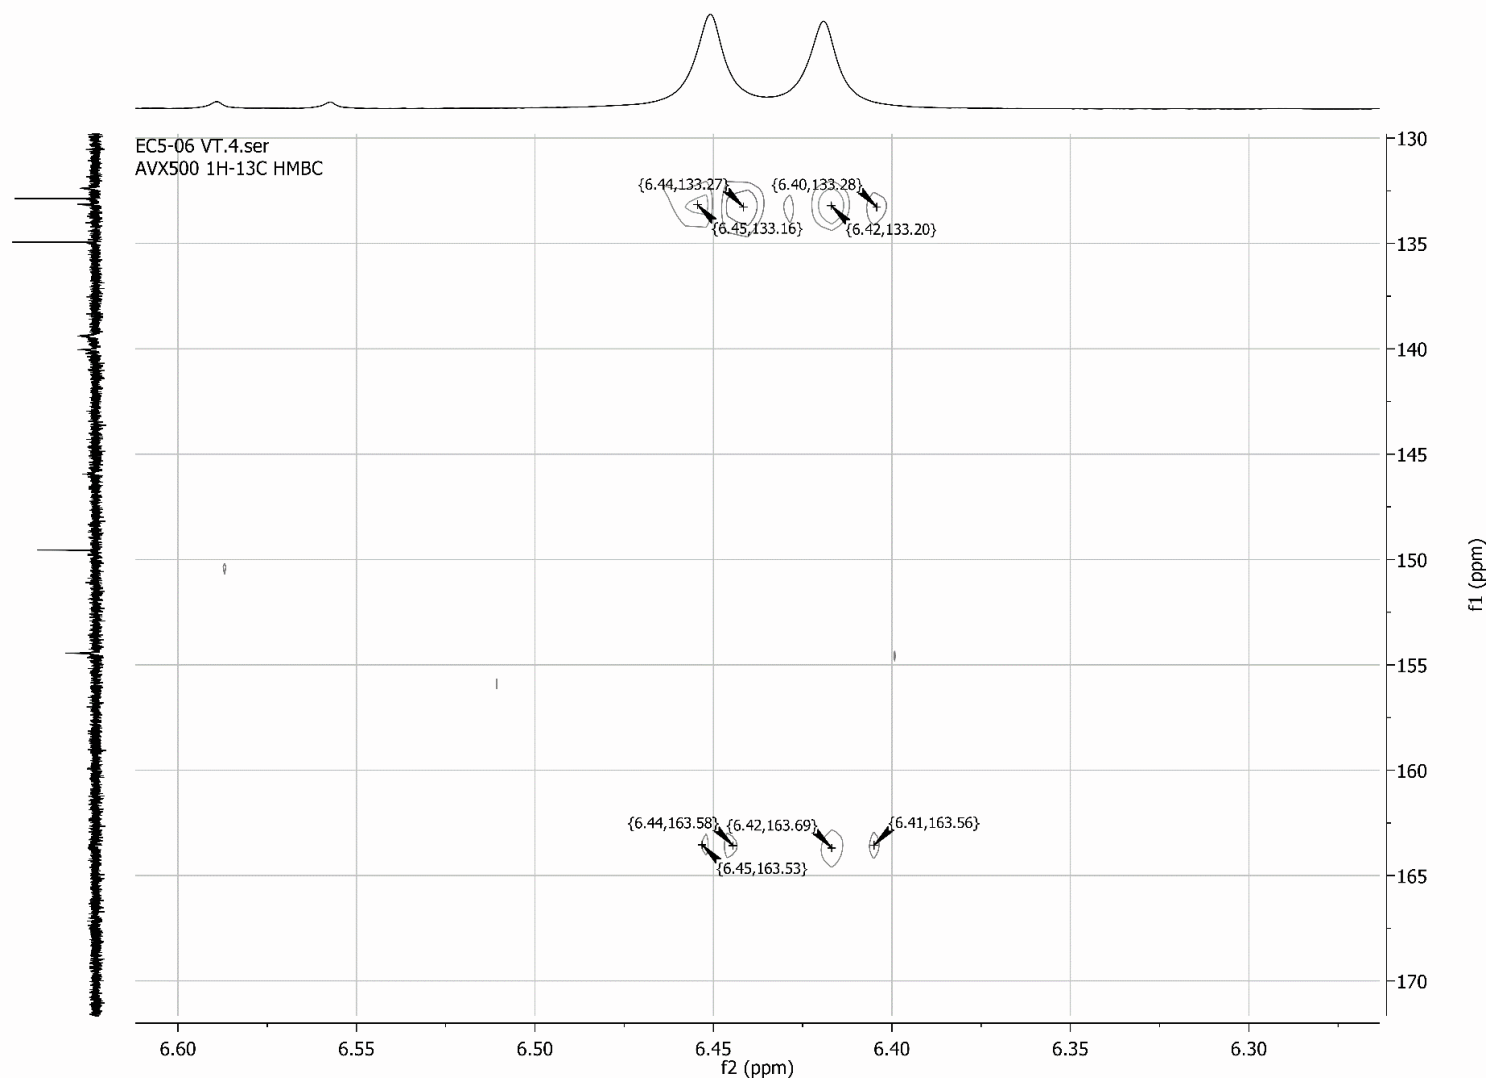

O-Benzyl-Panobinostat (Bn-Pano, **10**)

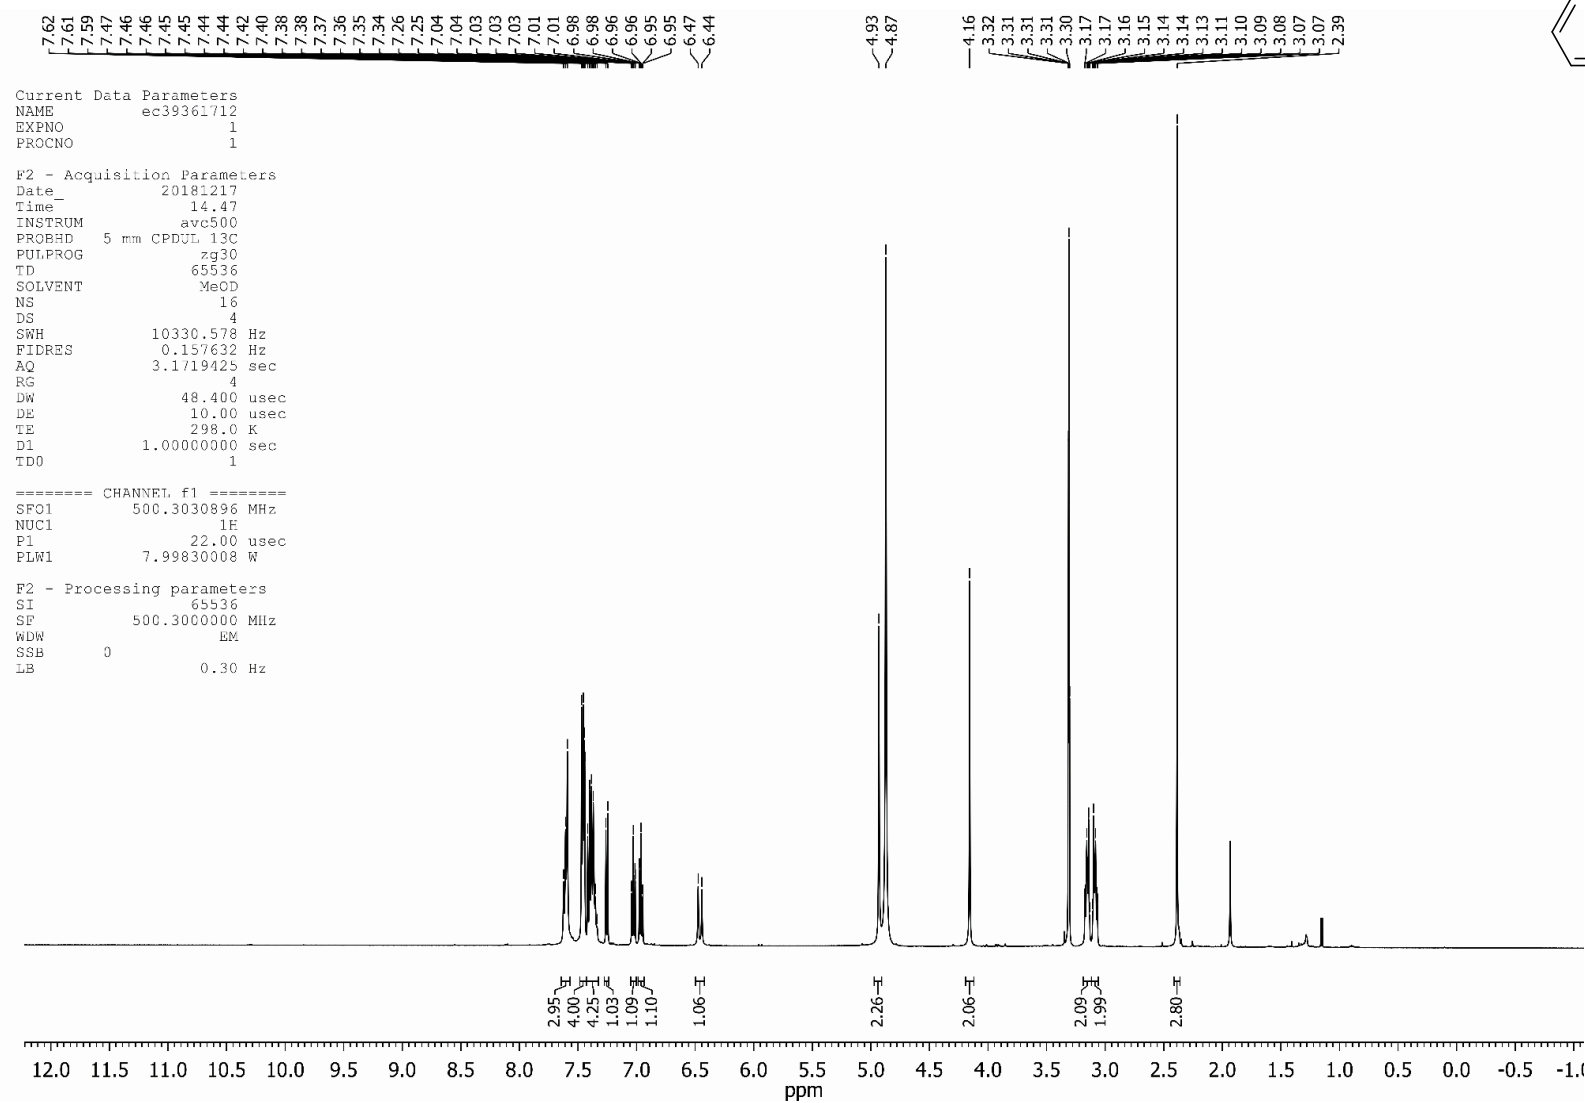

O-Benzyl-Panobinostat (Bn-Pano, **10**)

Current Data Parameters  
NAME ec39361712  
EXPNO 4  
PROCNO 1

F2 - Acquisition Parameters  
Date\_ 20181217  
Time\_ 15.34  
INSTRUM avc500  
PROBHD 5 mm CPDUL 13C  
PULPROG zgpg30  
TD 65536  
SOLVENT MeOD  
NS 2048  
DS 2  
SWH 31250.000 Hz  
FIDRES 0.476837 Hz  
AQ 1.0485760 sec  
RG 912  
DW 16.000 usec  
DE 18.000 usec  
TE 298.0 K  
D1 2.00000000 sec  
D11 0.03000000 sec  
TD0 1

===== CHANNEL f1 =====  
SFO1 125.8131152 MHz  
NUC1 13C  
P1 10.00 usec  
PLW1 20.18400002 W

===== CHANNEL f2 =====  
SFO2 500.3020012 MHz  
NUC2 1H  
CPDPRG12 waltz16  
PCPD2 80.00 usec  
PLW2 7.99830008 W  
PLW12 0.60487002 W  
PLW13 0.38712001 W

F2 - Processing parameters  
SI 32768  
SF 125.8005351 MHz  
WDW EM  
SSB 0  
LB 1.00 Hz  
GB 0  
PC 1.40

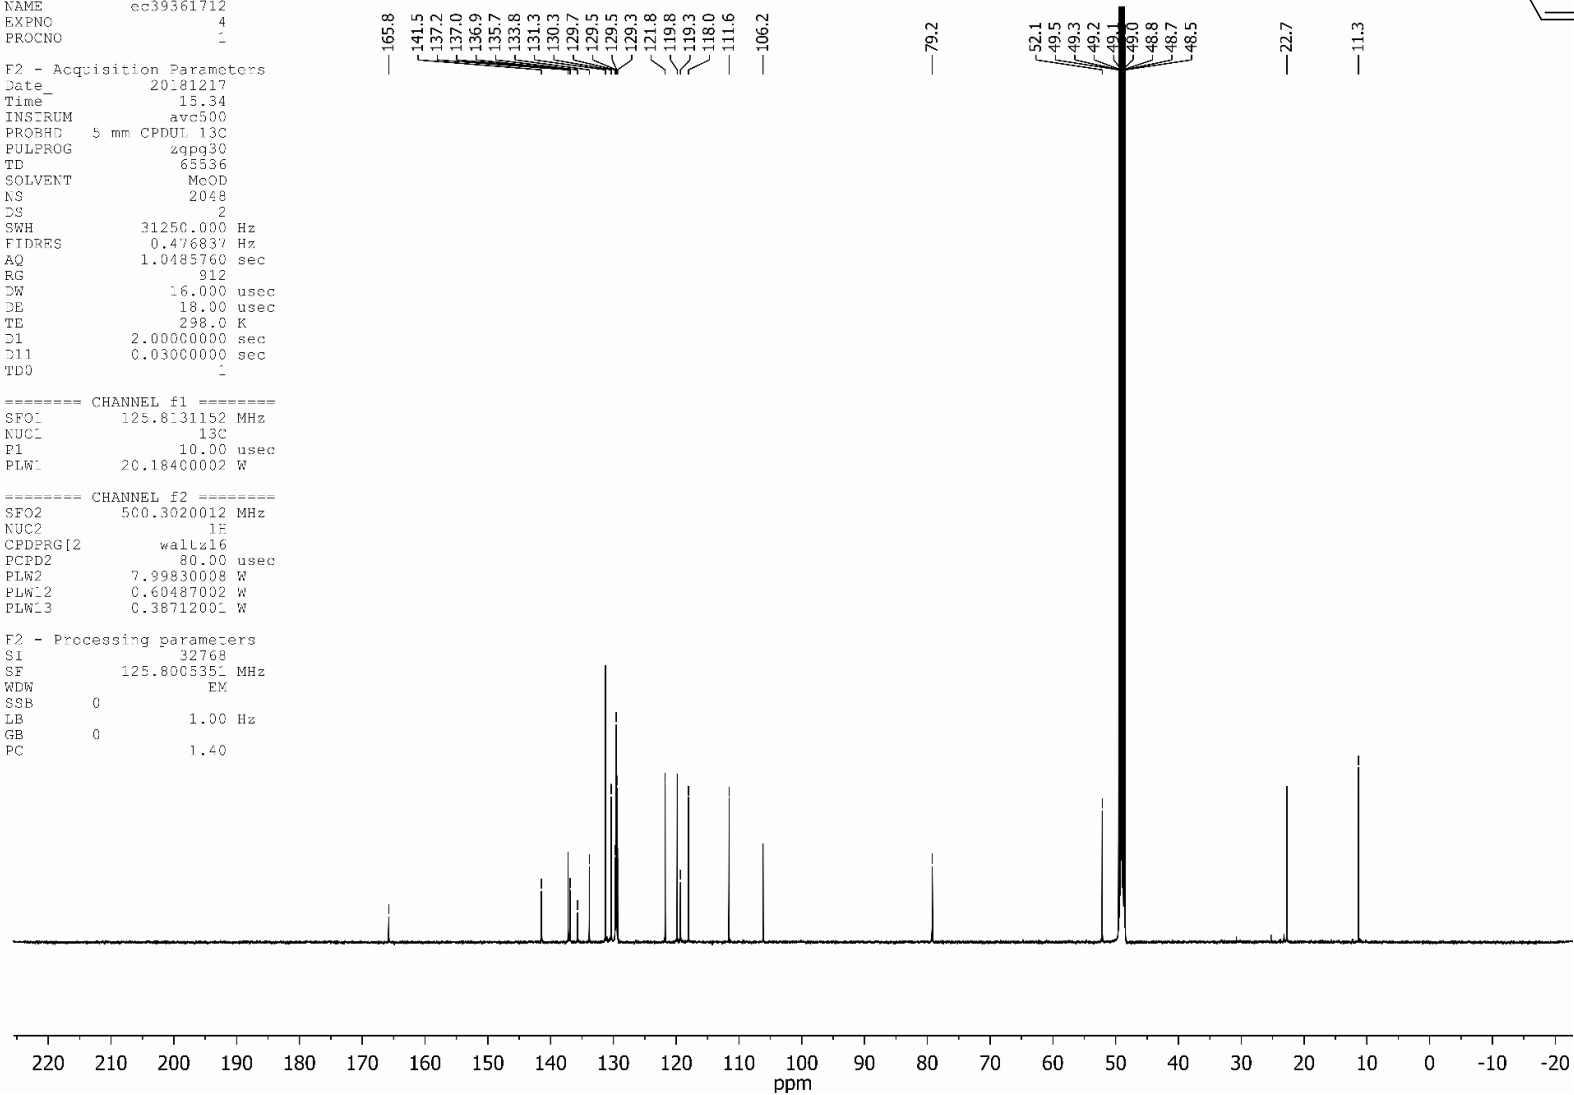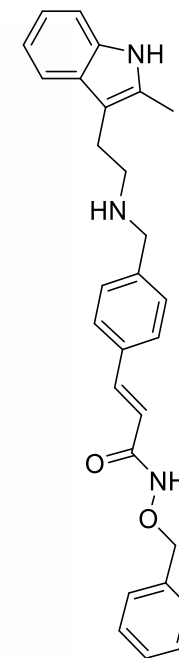

*O*-Benzyl-Panobinostat (Bn-Pano, **10**)

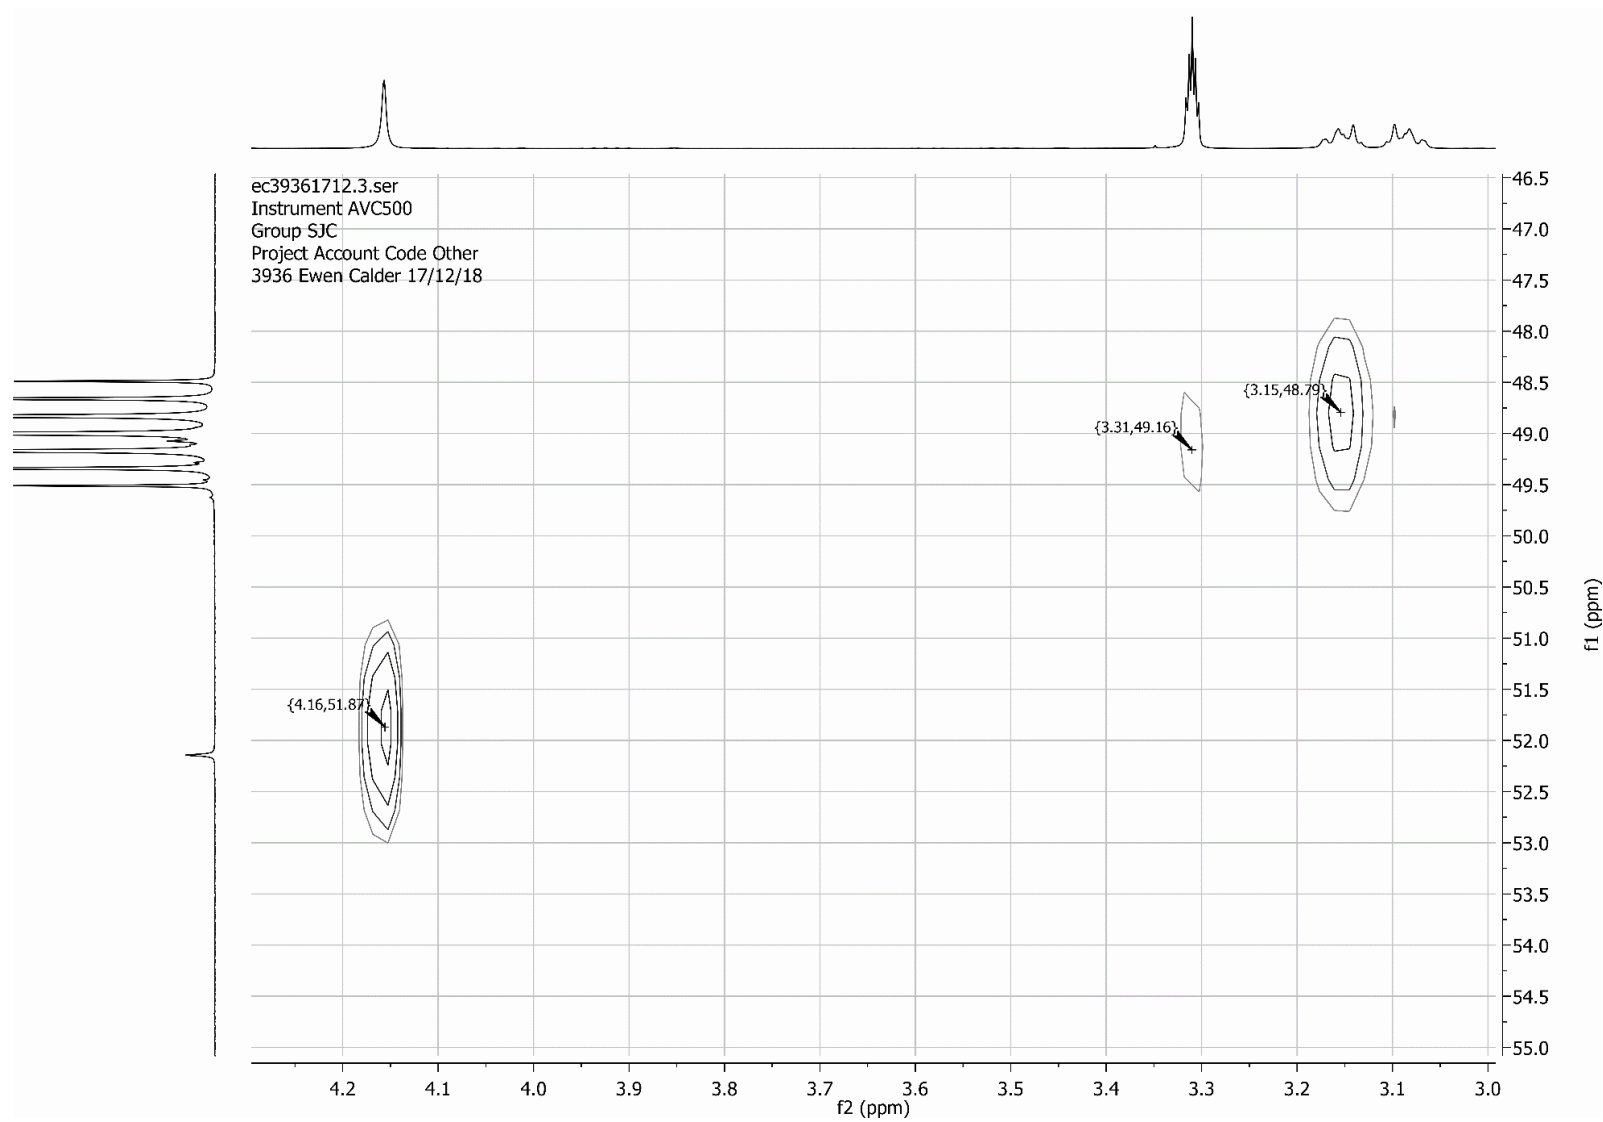

*O*-(4-Nitrobenzyl)-panobinostat trifluoroacetate (NB-Pano, **11**)

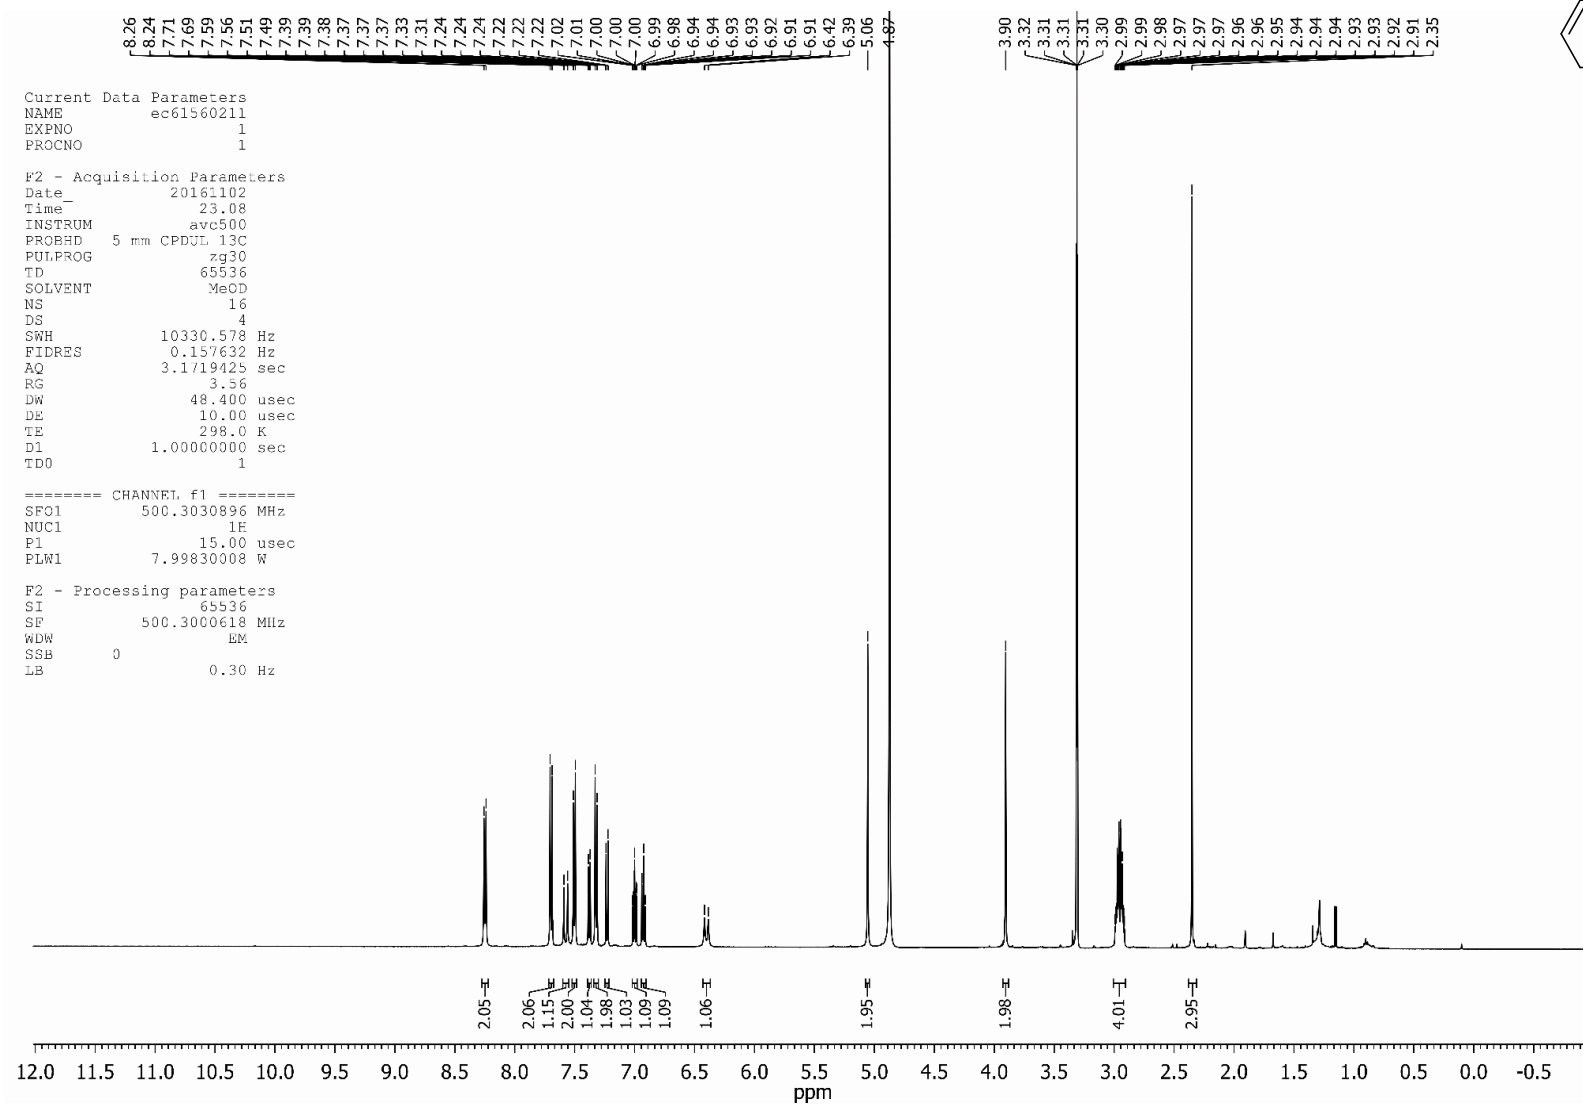

*O*-(4-Nitrobenzyl)-panobinostat trifluoroacetate (NB-Pano, **11**)

Current Data Parameters  
 NAME ec37151611  
 EXPNO 2  
 PROCNO 1

F2 - Acquisition Parameters  
 Date\_ 20181116  
 Time 15.10  
 INSTRUM avc500  
 PROBHD 5 mm CPDUL 13C  
 PULPROG zgpg30  
 TD 65536  
 SOLVENT MeOD  
 NS 2048  
 DS 2  
 SWH 31250.000 Hz  
 FIDRES 0.476837 Hz  
 AQ 1.0485760 sec  
 RG 912  
 DW 16.000 usec  
 DE 18.00 usec  
 TE 298.0 K  
 D1 2.00000000 sec  
 D11 0.03000000 sec  
 TD0 1

===== CHANNEL f1 =====  
 SFO1 125.8131152 MHz  
 NUC1 <sup>13</sup>C  
 P1 10.00 usec  
 PLW1 20.18400002 W

===== CHANNEL f2 =====  
 SFO2 500.3020012 MHz  
 NUC2 <sup>1</sup>H  
 CPDPRG2 waltz16  
 PCPD2 80.00 usec  
 PLW2 7.998300008 W  
 PLW12 0.60487002 W  
 PLW13 0.38712001 W

F2 - Processing parameters  
 SI 32768  
 SF 125.8005351 MHz  
 WDW EM  
 SSB 0  
 LB 1.00 Hz  
 GB 0  
 PC 1.40

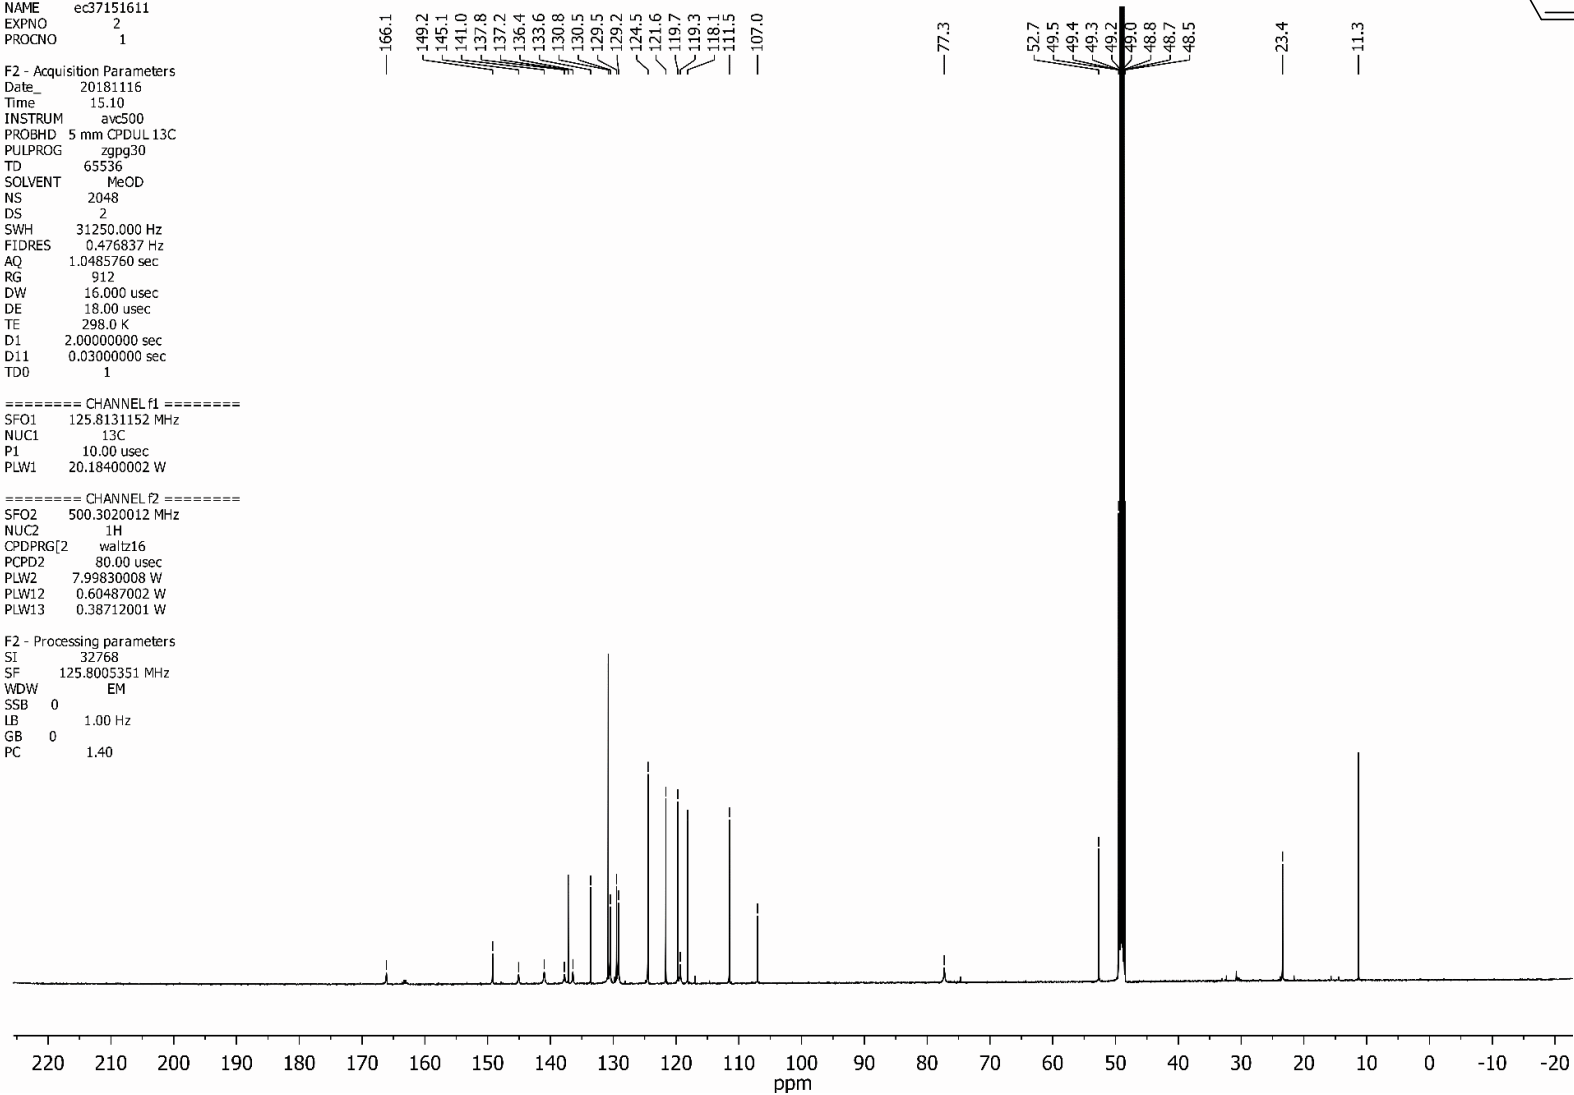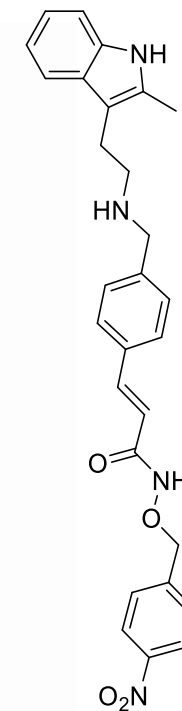

*O*-(5-Nitrothiophen-2-yl)methyl)-panobinostat trifluoroacetate (NT-Pano, **12**)

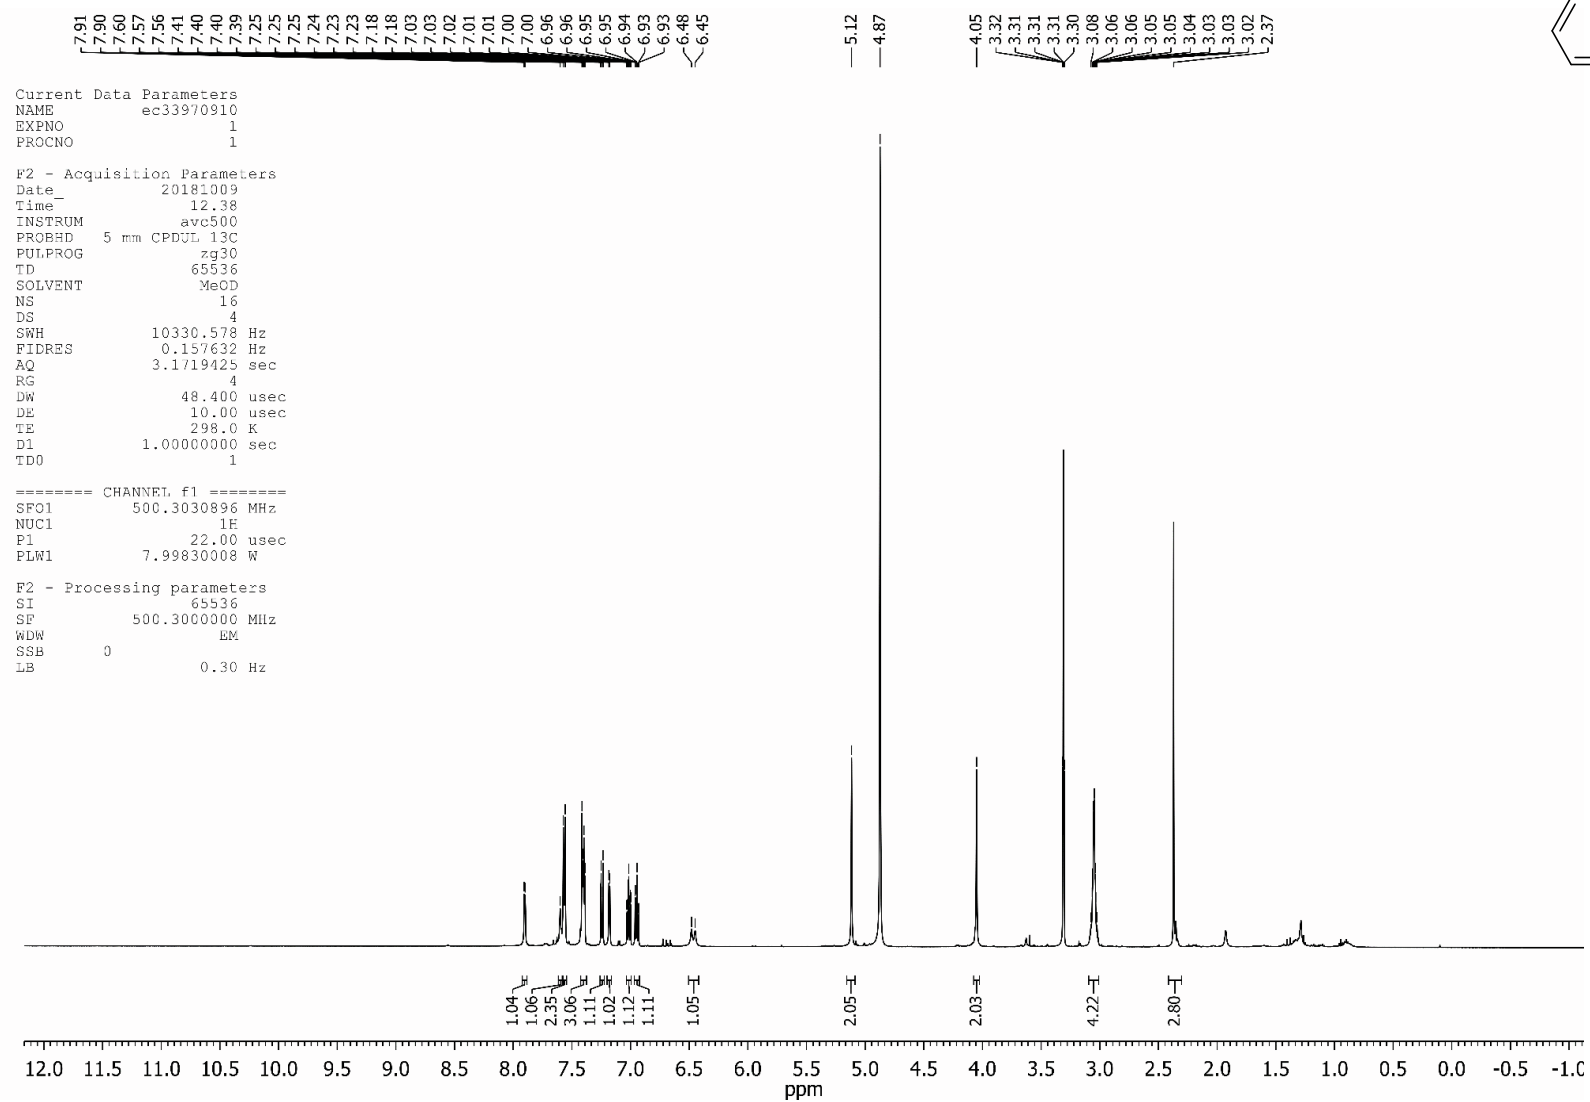

*O*-(5-Nitrothiophen-2-yl)methyl)-panobinostat trifluoroacetate (NT-Pano, **12**)

Current Data Parameters  
NAME ec33970910  
EXPNO 3  
PROCNO 1

F2 - Acquisition Parameters  
Date\_ 20181009  
Time 13.34  
INSTRUM avc500  
PROBHD 5 mm CPDUL 13C  
PULPROG zgpg30  
TD 65536  
SOLVENT MeOD  
NS 2048  
DS 2  
SWH 31250.000 Hz  
FIDRES 0.476837 Hz  
AQ 1.0485760 sec  
RG 912  
DW 16.000 usec  
DE 18.00 usec  
TE 298.0 K  
D1 2.00000000 sec  
D11 0.03000000 sec  
TD0 1

===== CHANNEL f1 =====  
SFO1 125.8131152 MHz  
NUC1 13C  
P1 10.00 usec  
PLW1 20.18400002 W

===== CHANNEL f2 =====  
SFO2 500.3020012 MHz  
NUC2 1H  
CPDPRG2 waltz16  
PCPD2 80.00 usec  
PLW2 7.998300008 W  
PLW12 0.60487002 W  
PLW13 0.38712001 W

F2 - Processing parameters  
SI 32768  
SF 125.8005351 MHz  
WDW EM  
SSB 0  
LB 1.00 Hz  
GB 0  
PC 1.40

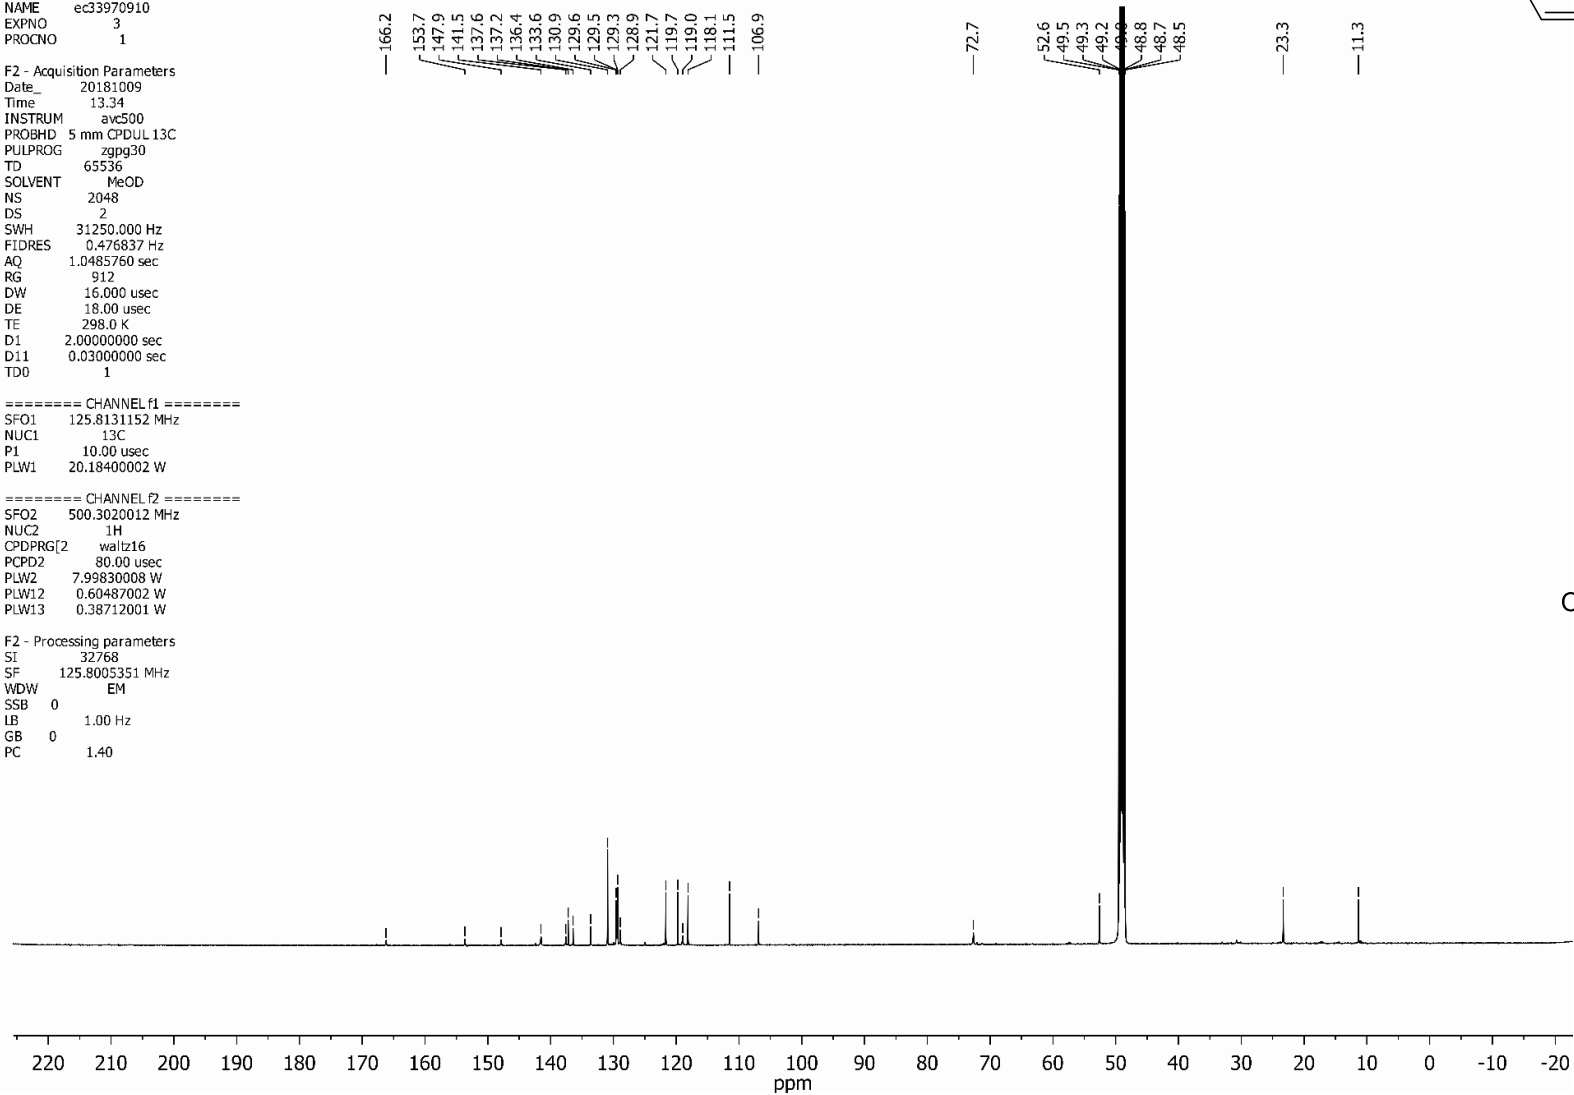



*O*-(5-Nitrothiophen-2-yl)methyl)-panobinostat trifluoroacetate (NT-Pano, **12**)

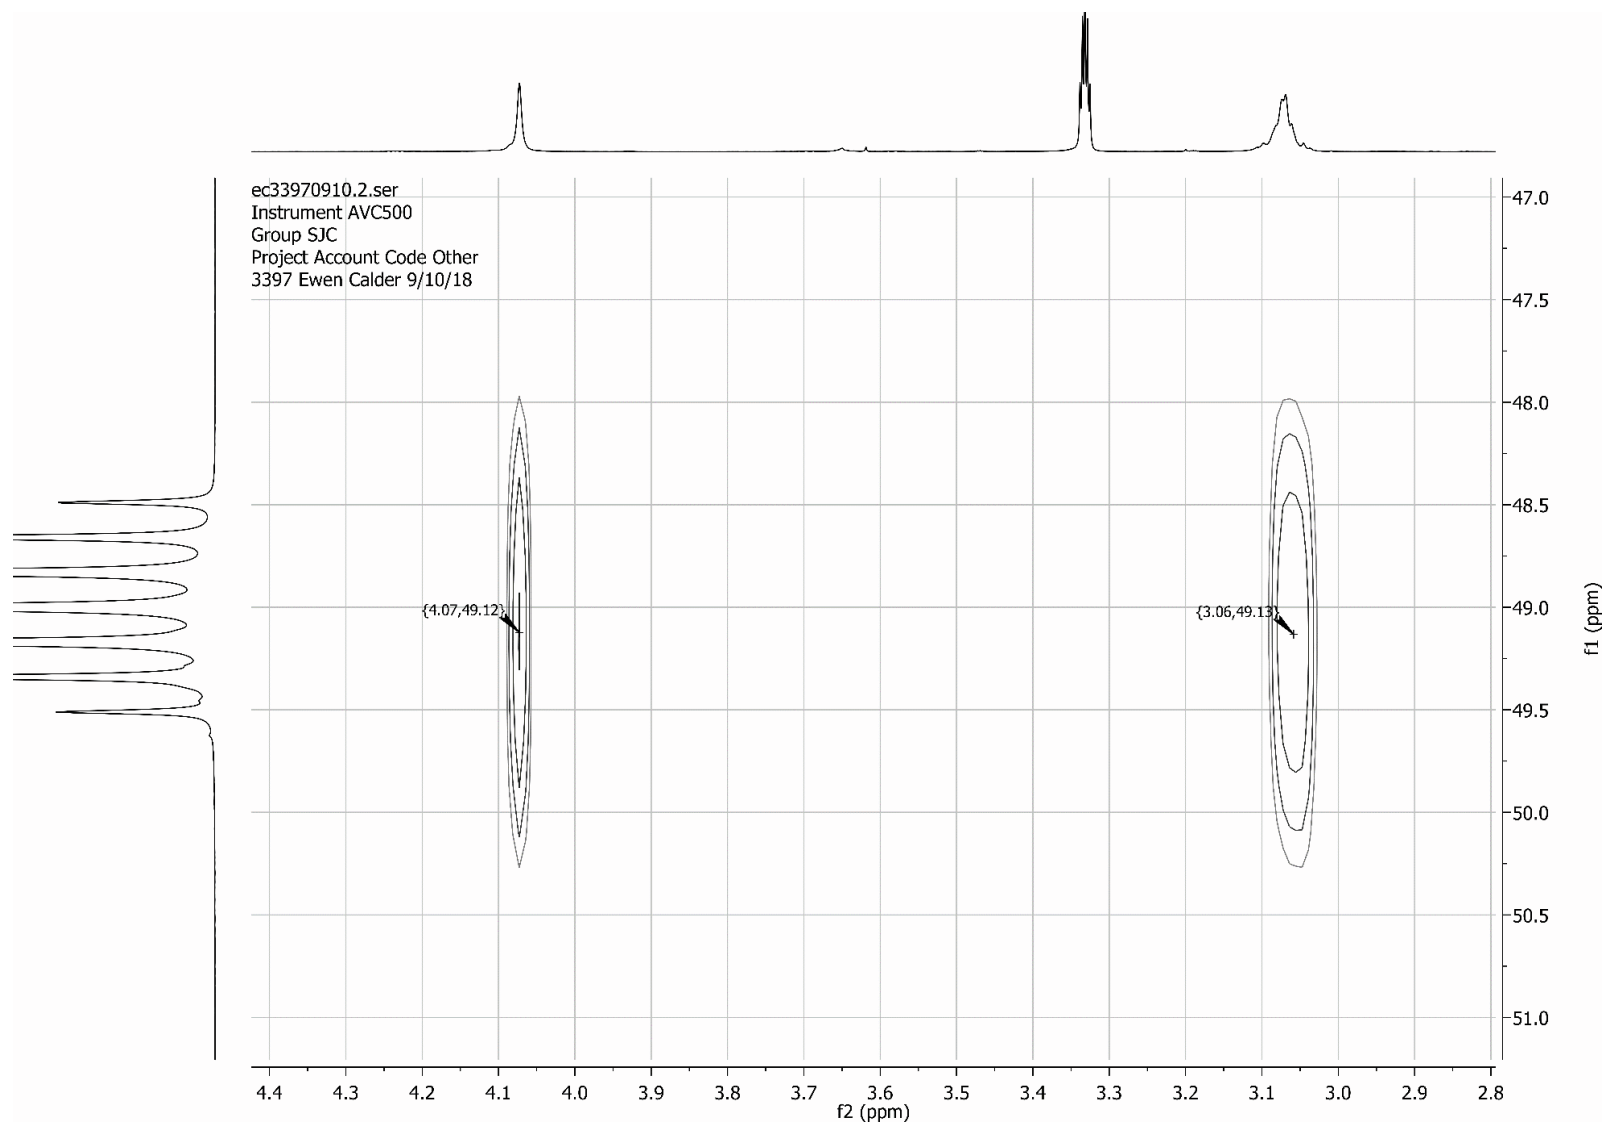

O-(6-Nitroquinolin-5-yl)methyl)-panobinostat di-trifluoroacetate (NQ-Pano, **13**)

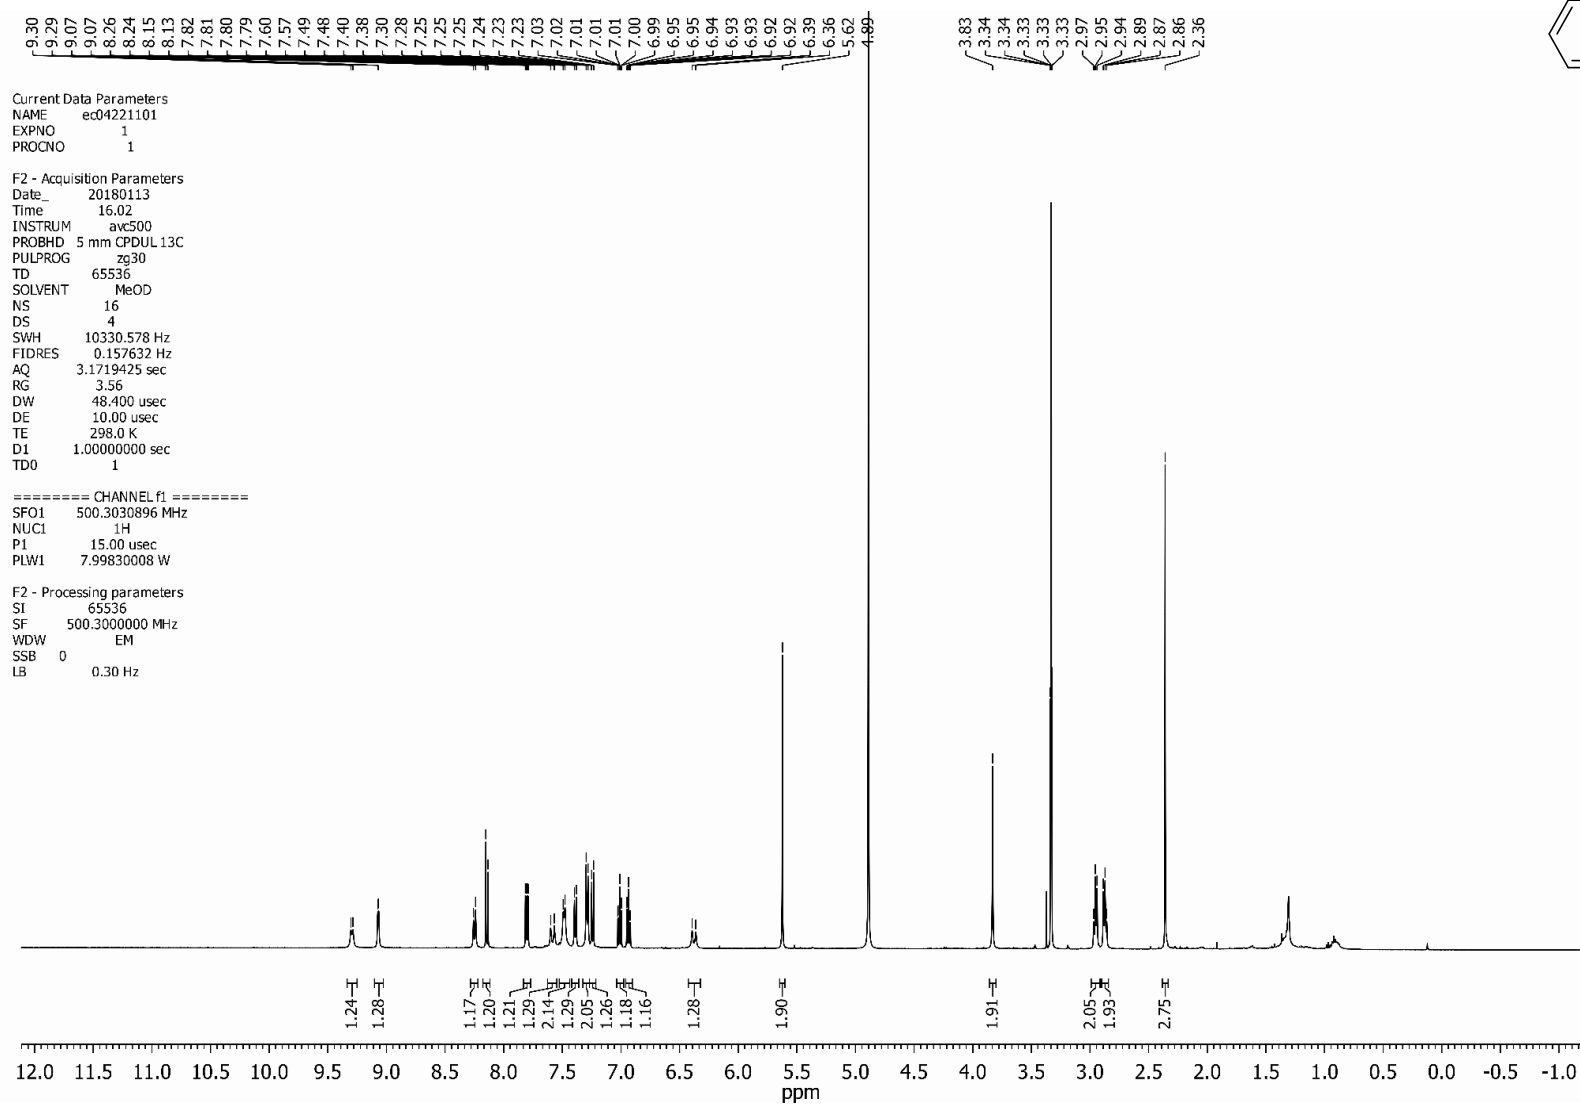

O-(6-Nitroquinolin-5-yl)methyl)-panobinostat di-trifluoroacetate (NQ-Pano, **13**)

Current Data Parameters  
NAME ec04221101  
EXPNO 4  
PROCNO 1

F2 - Acquisition Parameters  
Date\_ 20180113  
Time\_ 19.00  
INSTRUM avc500  
PROBHD 5 mm CPDUL 13C  
PULPROG zgpg30  
TD 65536  
SOLVENT MeOD  
NS 2048  
DS 2  
SWH 31250.000 Hz  
FIDRES 0.476837 Hz  
AQ 1.0485760 sec  
RG 912  
DW 16.000 usec  
DE 18.000 usec  
TE 298.0 K  
D1 2.00000000 sec  
D11 0.03000000 sec  
TD0 -

===== CHANNEL f1 =====  
SFO1 125.8131152 MHz  
NUC1 13C  
P1 10.00 usec  
PLW1 20.18400002 W

===== CHANNEL f2 =====  
SFO2 500.3020012 MHz  
NUC2 1H  
CPDPRG2 waltz16  
PCPD2 80.00 usec  
PLW2 7.99830008 W  
PLW12 0.28119001 W  
PLW13 0.17996000 W

F2 - Processing parameters  
SI 32768  
SF 125.8005351 MHz  
WDW EM  
SSB 0  
LB 1.00 Hz  
GB 0  
PC 1.40

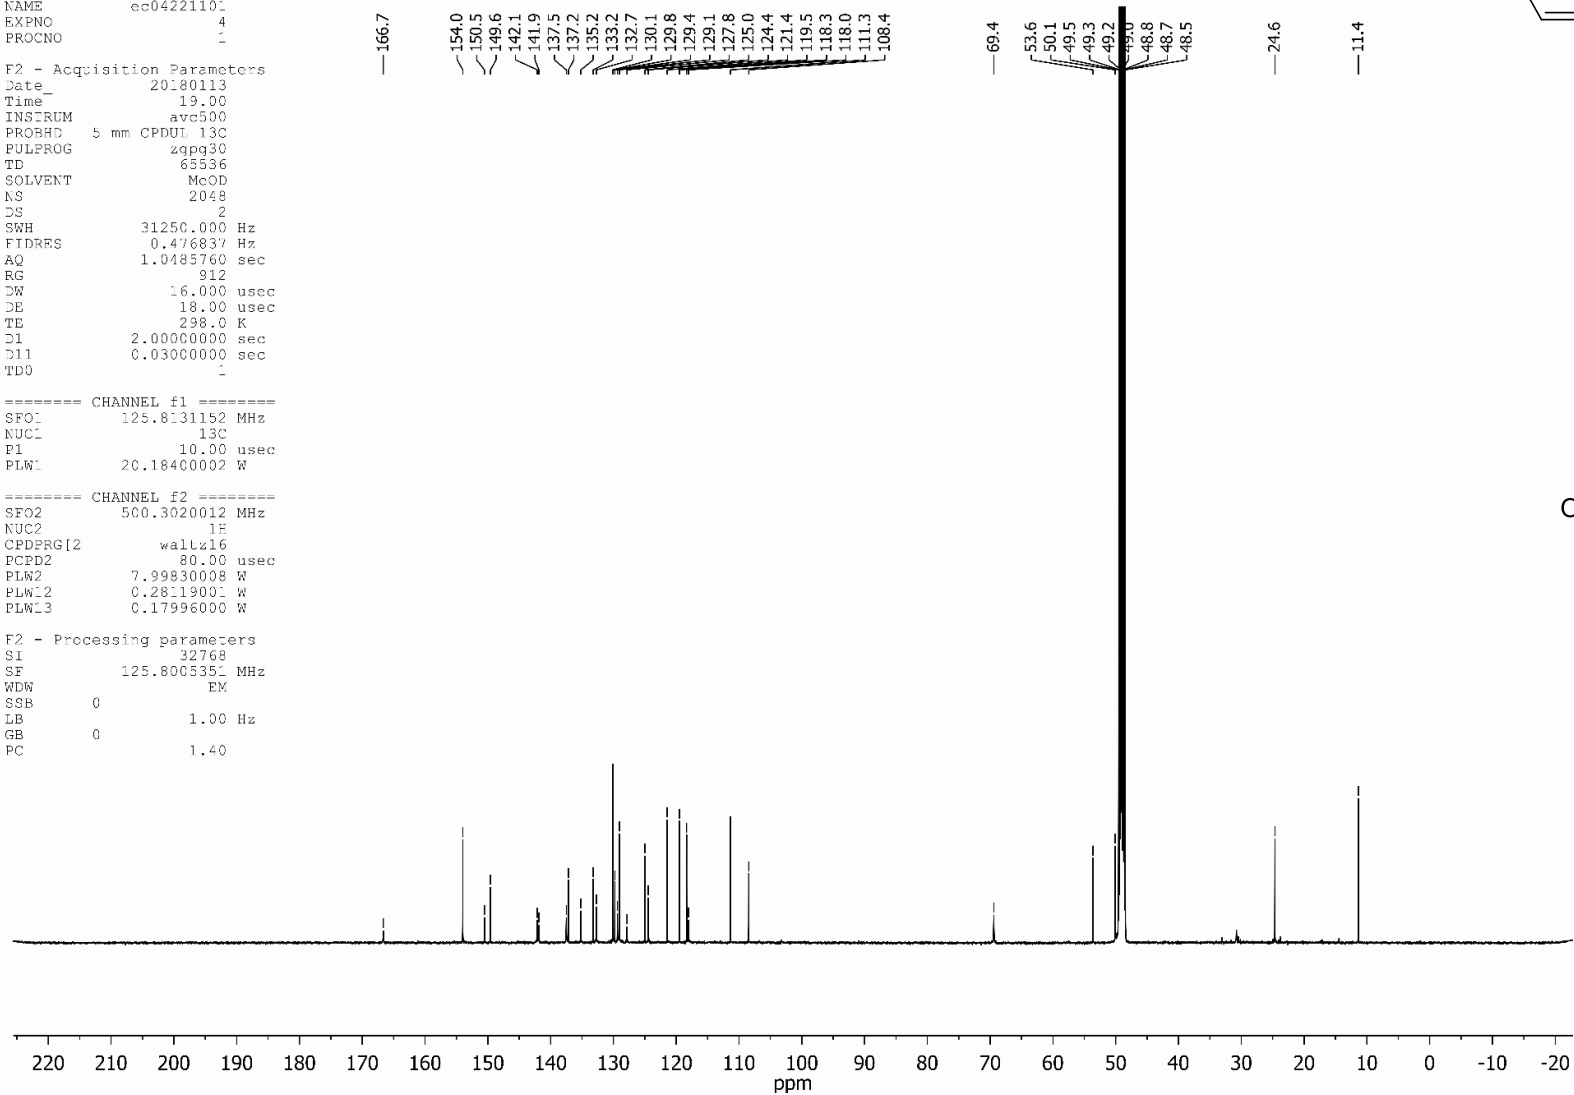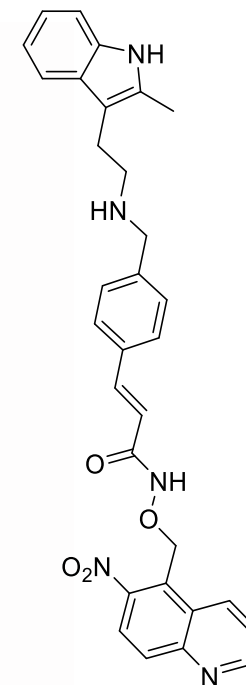

*N,N*-Di-Boc-Panobinostat (**14**)

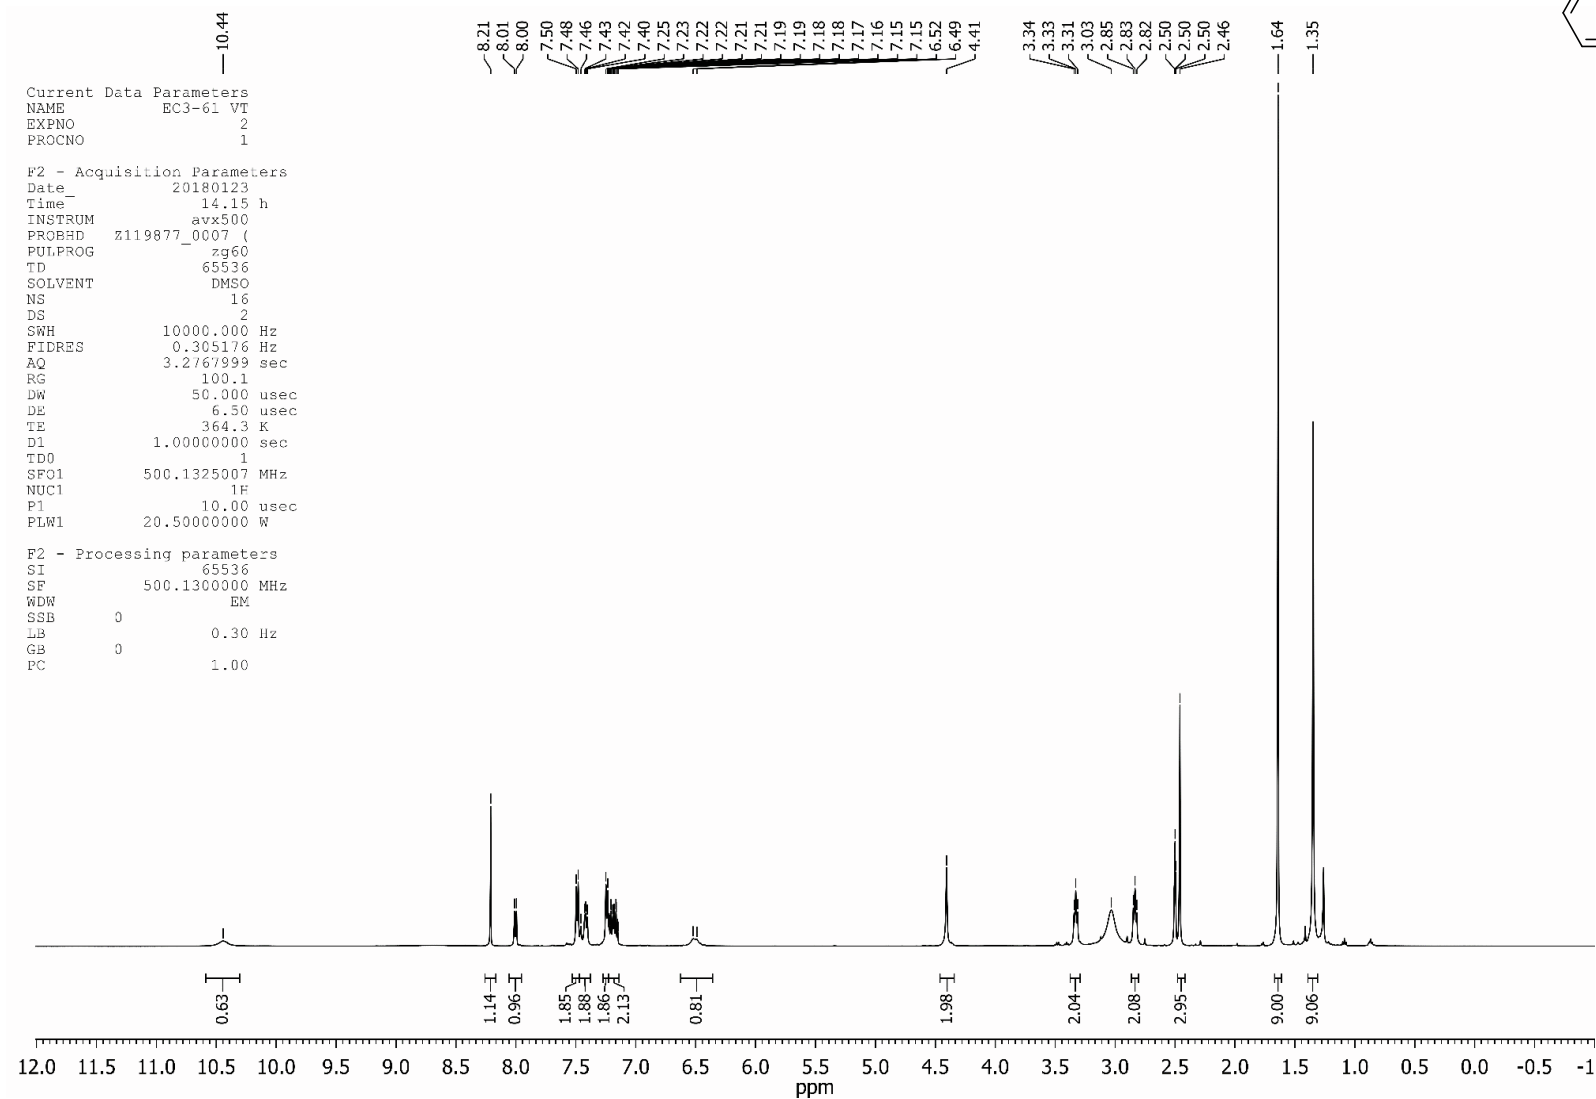

*N,N*-Di-Boc-Panobinostat (**14**)

Current Data Parameters  
 NAME EC3-61 V  
 EXPNO 6  
 PROCNO 1

F2 - Acquisition Parameters  
 Date\_ 20180123  
 Time\_ 17.02 h  
 INSTRUM avx500  
 PROBHD Z119877\_0007 (   
 PULPROG zgpg30  
 TD 65536  
 SOLVENT DMSO  
 NS 2048  
 DS 4  
 SWH 29761.904 Hz  
 FIDRES 0.908261 Hz  
 AQ 1.1010048 sec  
 RG 191.37  
 DW 16.800 usec  
 DE 6.50 usec  
 TE 363.0 K  
 D1 2.00000000 sec  
 D11 0.03000000 sec  
 TD0 -  
 SFO1 125.7703643 MHz  
 NUC1 13C  
 P1 10.00 usec  
 PLW1 76.00000000 W  
 SFO2 500.1320005 MHz  
 NUC2 1H  
 CPDPRG[2] waltz16  
 PCPD2 80.00 usec  
 PLW2 20.50000000 W  
 PLW12 0.32031000 W  
 PLW13 0.1611000 W

F2 - Processing parameters  
 SI 32768  
 SF 125.7577885 MHz  
 WDW EM  
 SSB 0  
 LB 1.00 Hz  
 GB 0  
 PC 1.40

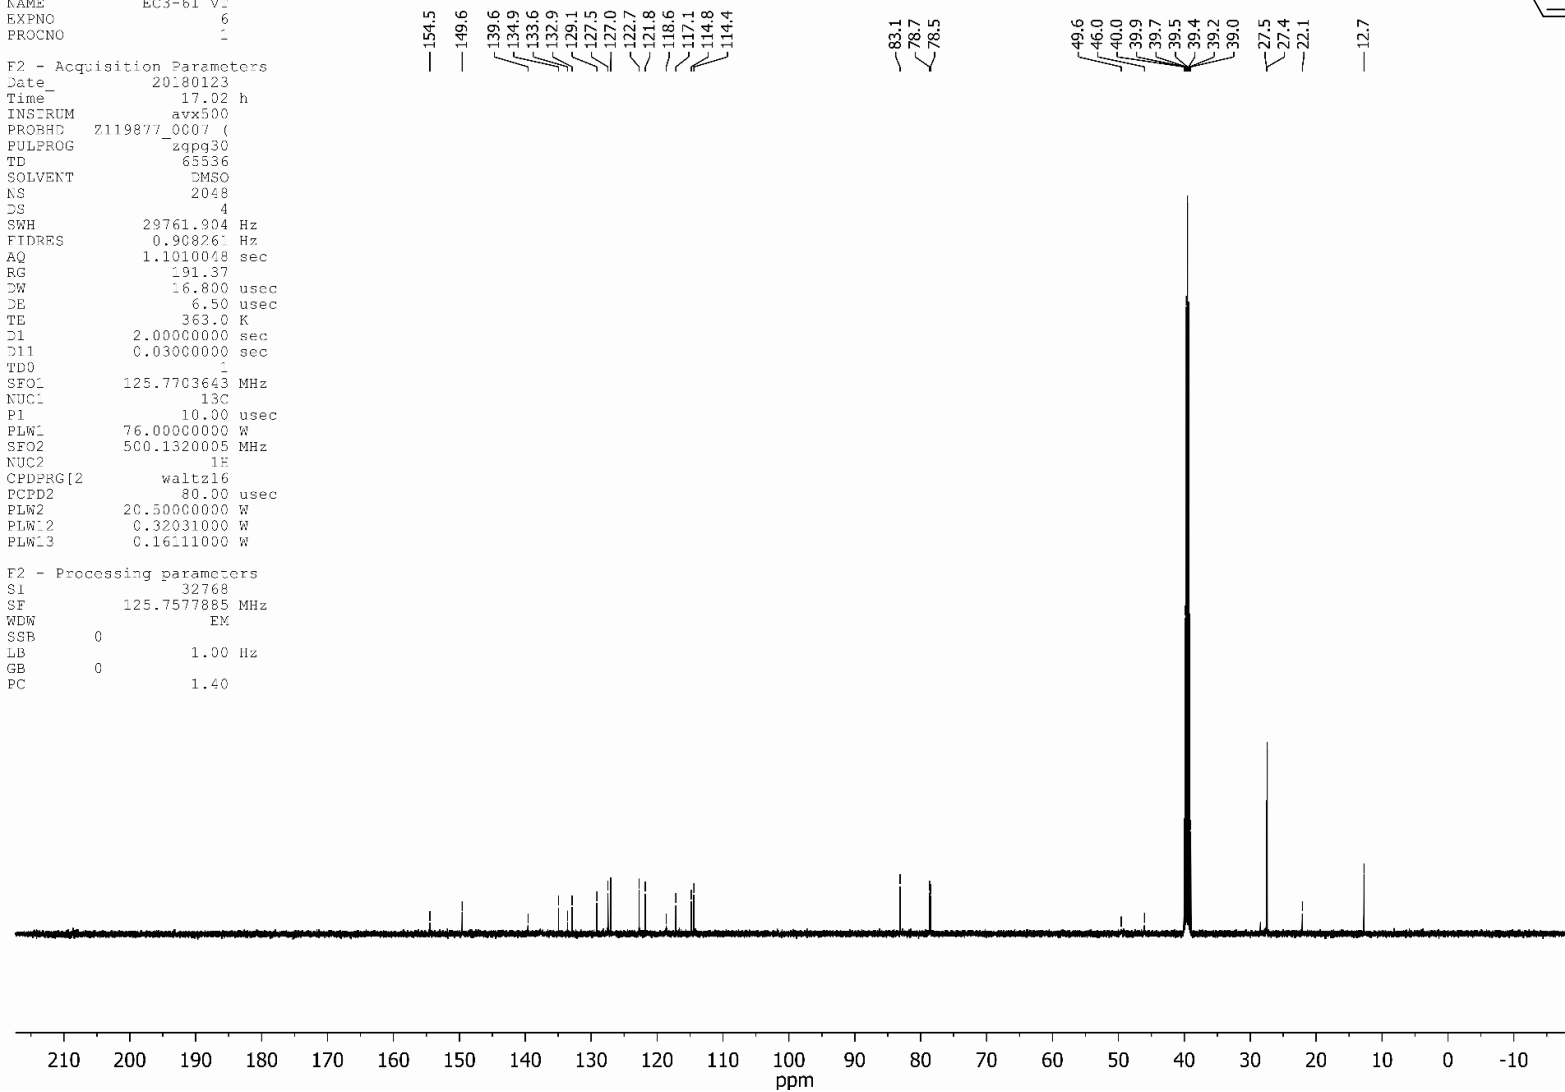

*N,N*-Di-Boc-Panobinostat (**14**)

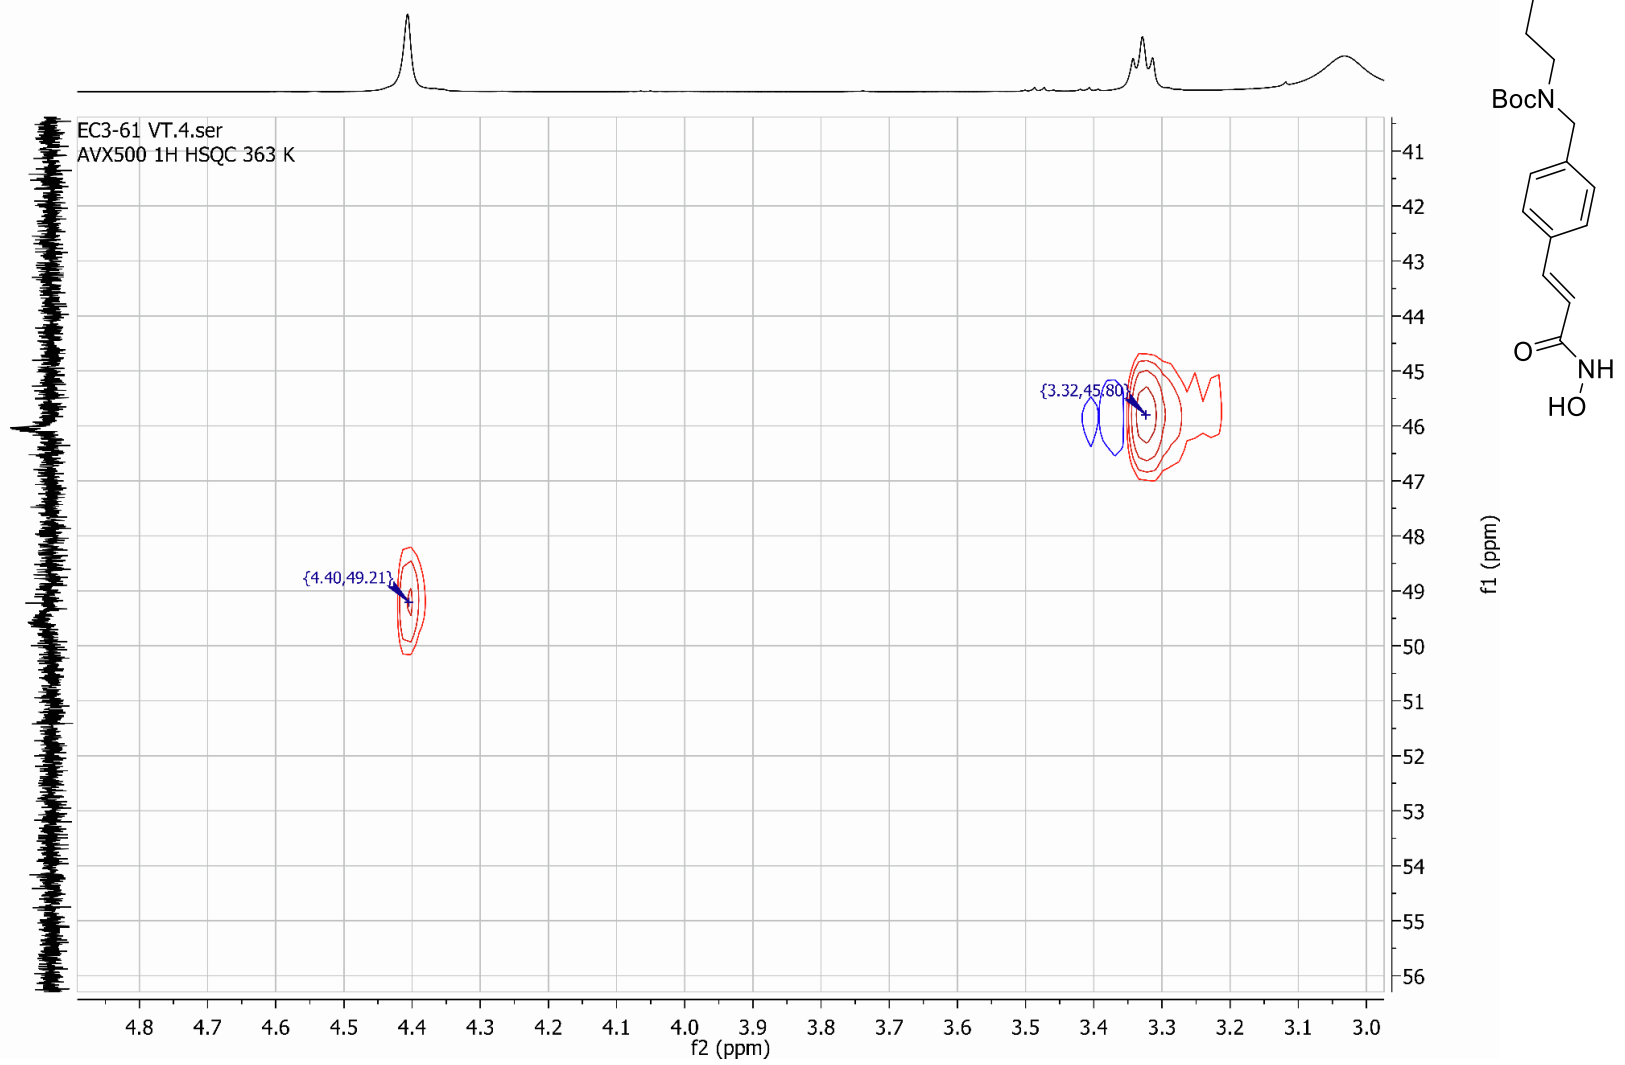

O-((1-Methyl-2-nitroimidazol-5-yl)methyl)-Panobinostat di-trifluoroacetate (CH-03, NI-Pano, 1)

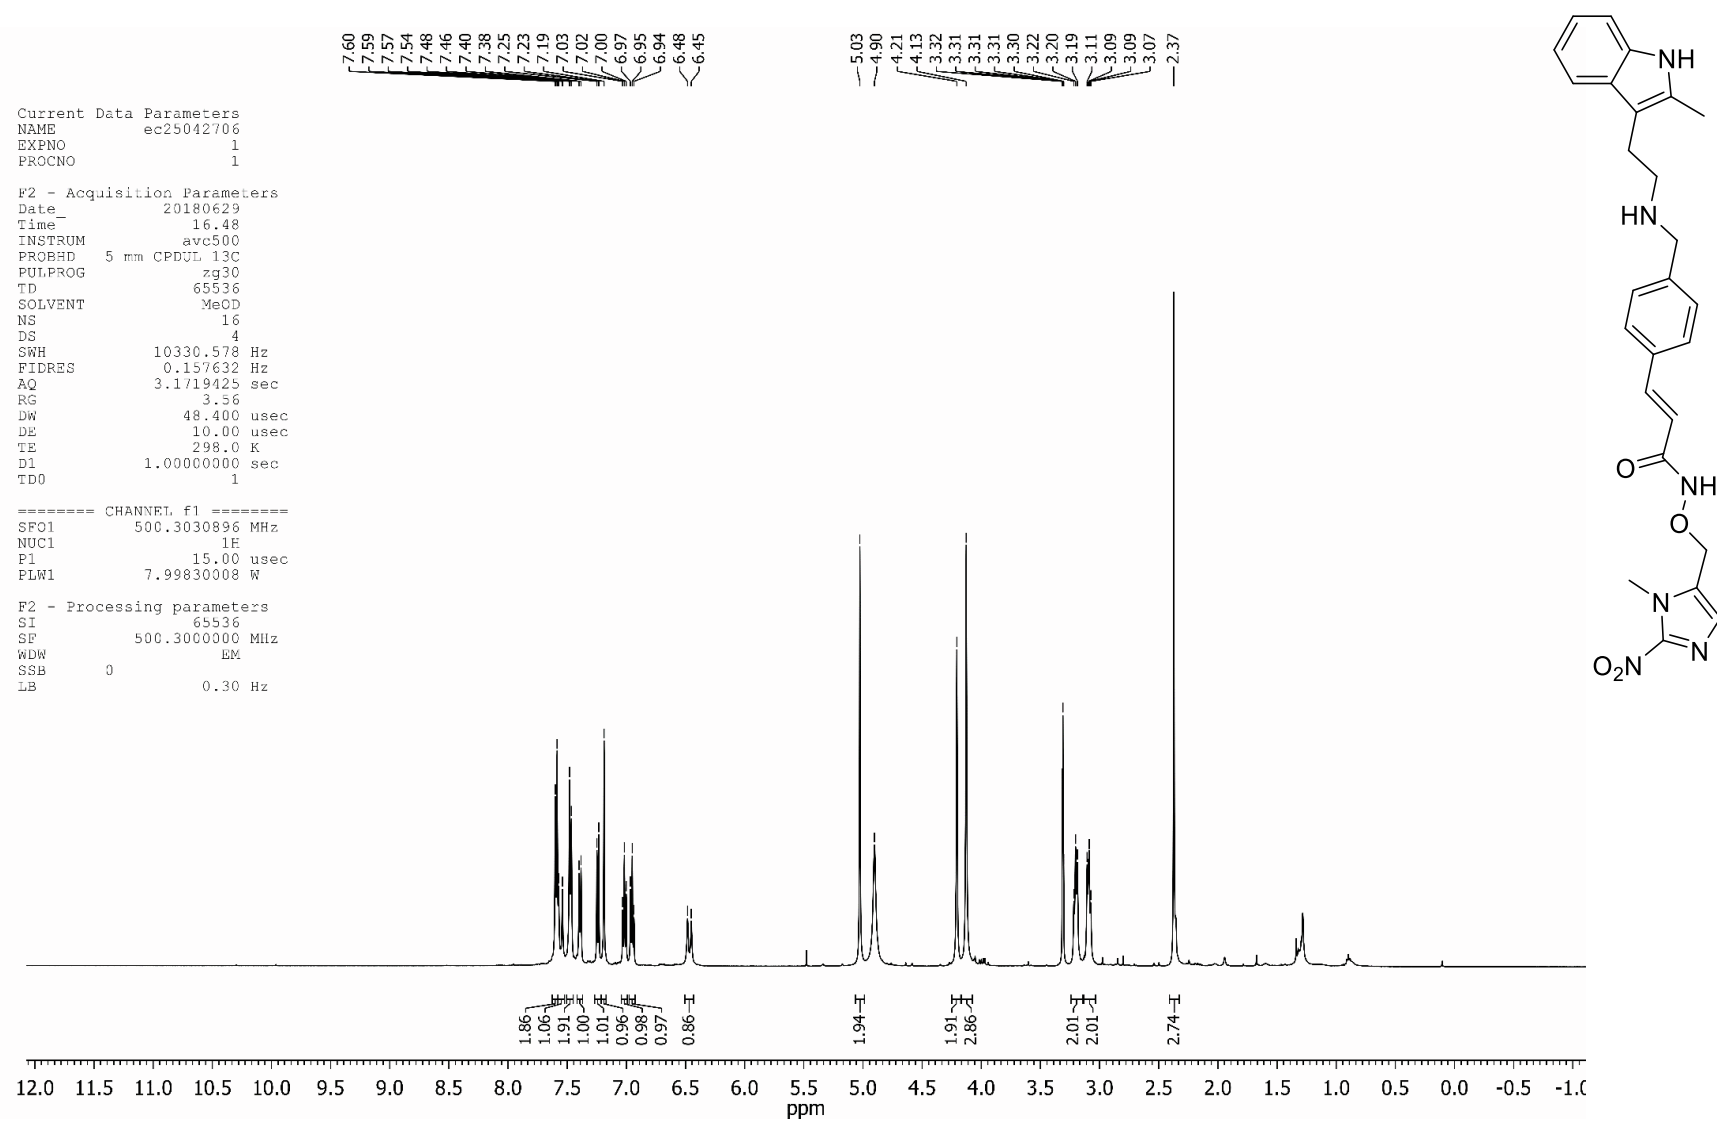

O-((1-Methyl-2-nitroimidazol-5-yl)methyl)-Panobinostat di-trifluoroacetate (CH-03, NI-Pano, 1)

Current Data Parameters  
NAME ec25042706  
EXPNO 4  
PROCNO 1

F2 - Acquisition Parameters  
Date\_ 20180629  
Time\_ 18.03  
INSTRUM avc500  
PROBHD 5 mm CPDUL 13C  
PULPROG zgpg30  
TD 65536  
SOLVENT MeOD  
NS 1024  
DS 2  
SWH 31250.000 Hz  
FIDRES 0.476837 Hz  
AQ 1.0485760 sec  
RG 912  
DW 16.000 usec  
DE 18.00 usec  
TE 298.0 K  
D1 2.00000000 sec  
D11 0.03000000 sec  
TD0 -

===== CHANNEL f1 =====  
SFO1 125.8131152 MHz  
NUC1 13C  
P1 10.00 usec  
PLW1 20.18400002 W

===== CHANNEL f2 =====  
SFO2 500.3020012 MHz  
NUC2 1H  
CPDPRG2 waltz16  
PCPD2 80.00 usec  
PLW2 7.99830008 W  
PLW12 0.28119001 W  
PLW13 0.17996000 W

F2 - Processing parameters  
SI 32768  
SF 125.8005351 MHz  
WDW EM  
SSB 0  
LB 1.00 Hz  
GB 0  
PC 1.40

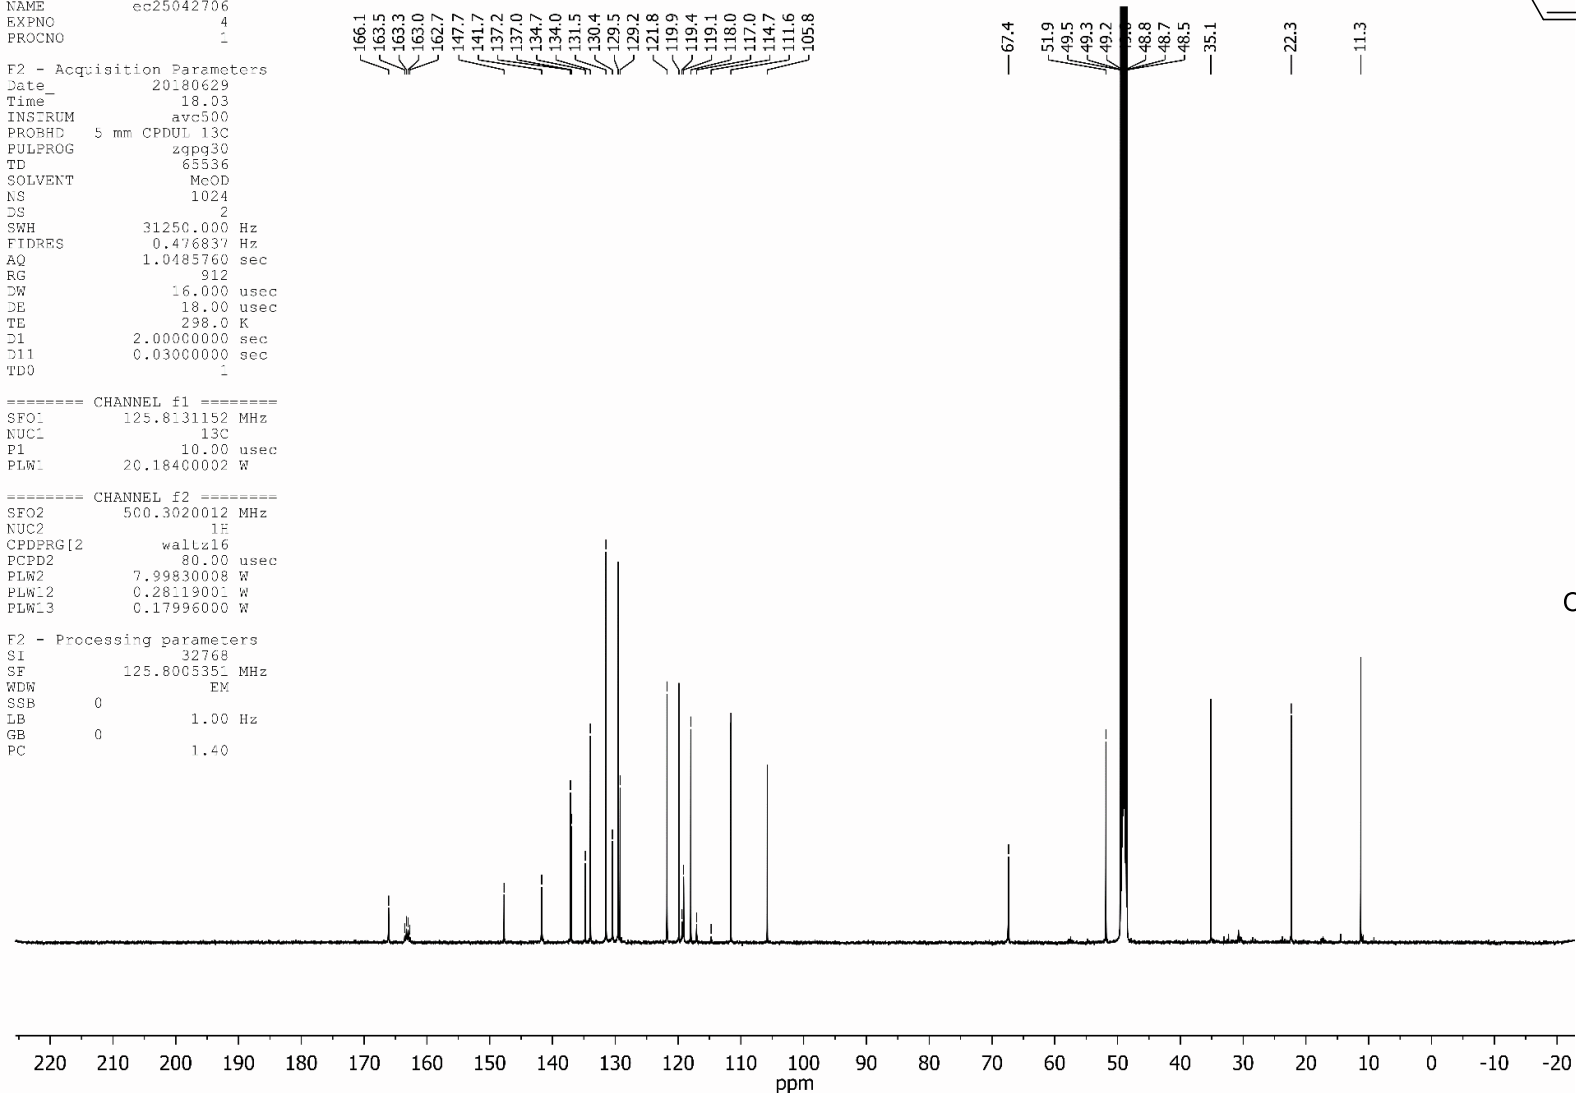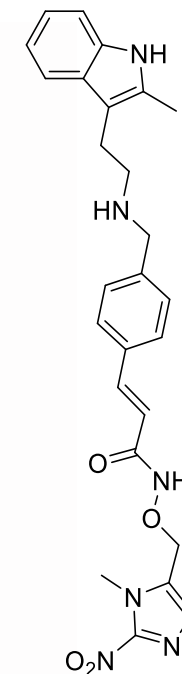



O-((1-Methyl-2-nitroimidazol-5-yl)methyl)-Panobinostat di-trifluoroacetate (CH-03, NI-Pano, 1)

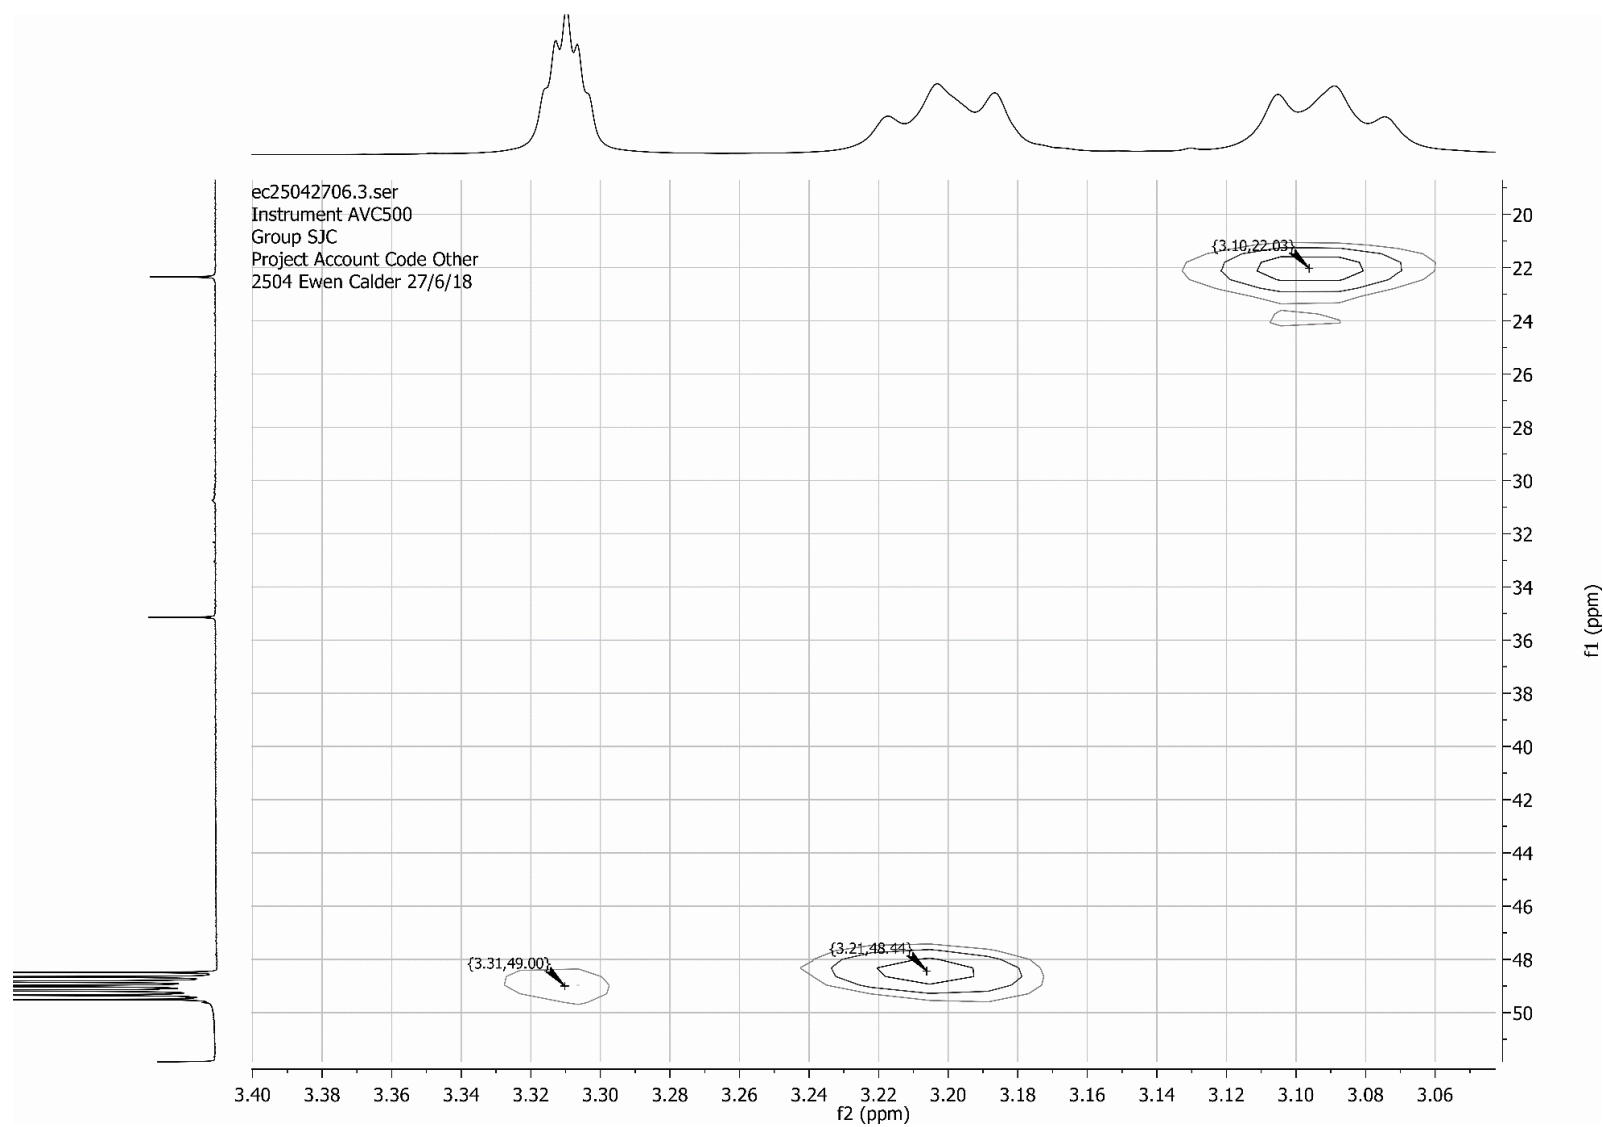

*O*-((1-Methyl-2-nitroimidazol-5-yl)methyl)-Panobinostat di-trifluoroacetate (CH-03, NI-Pano, **1**)

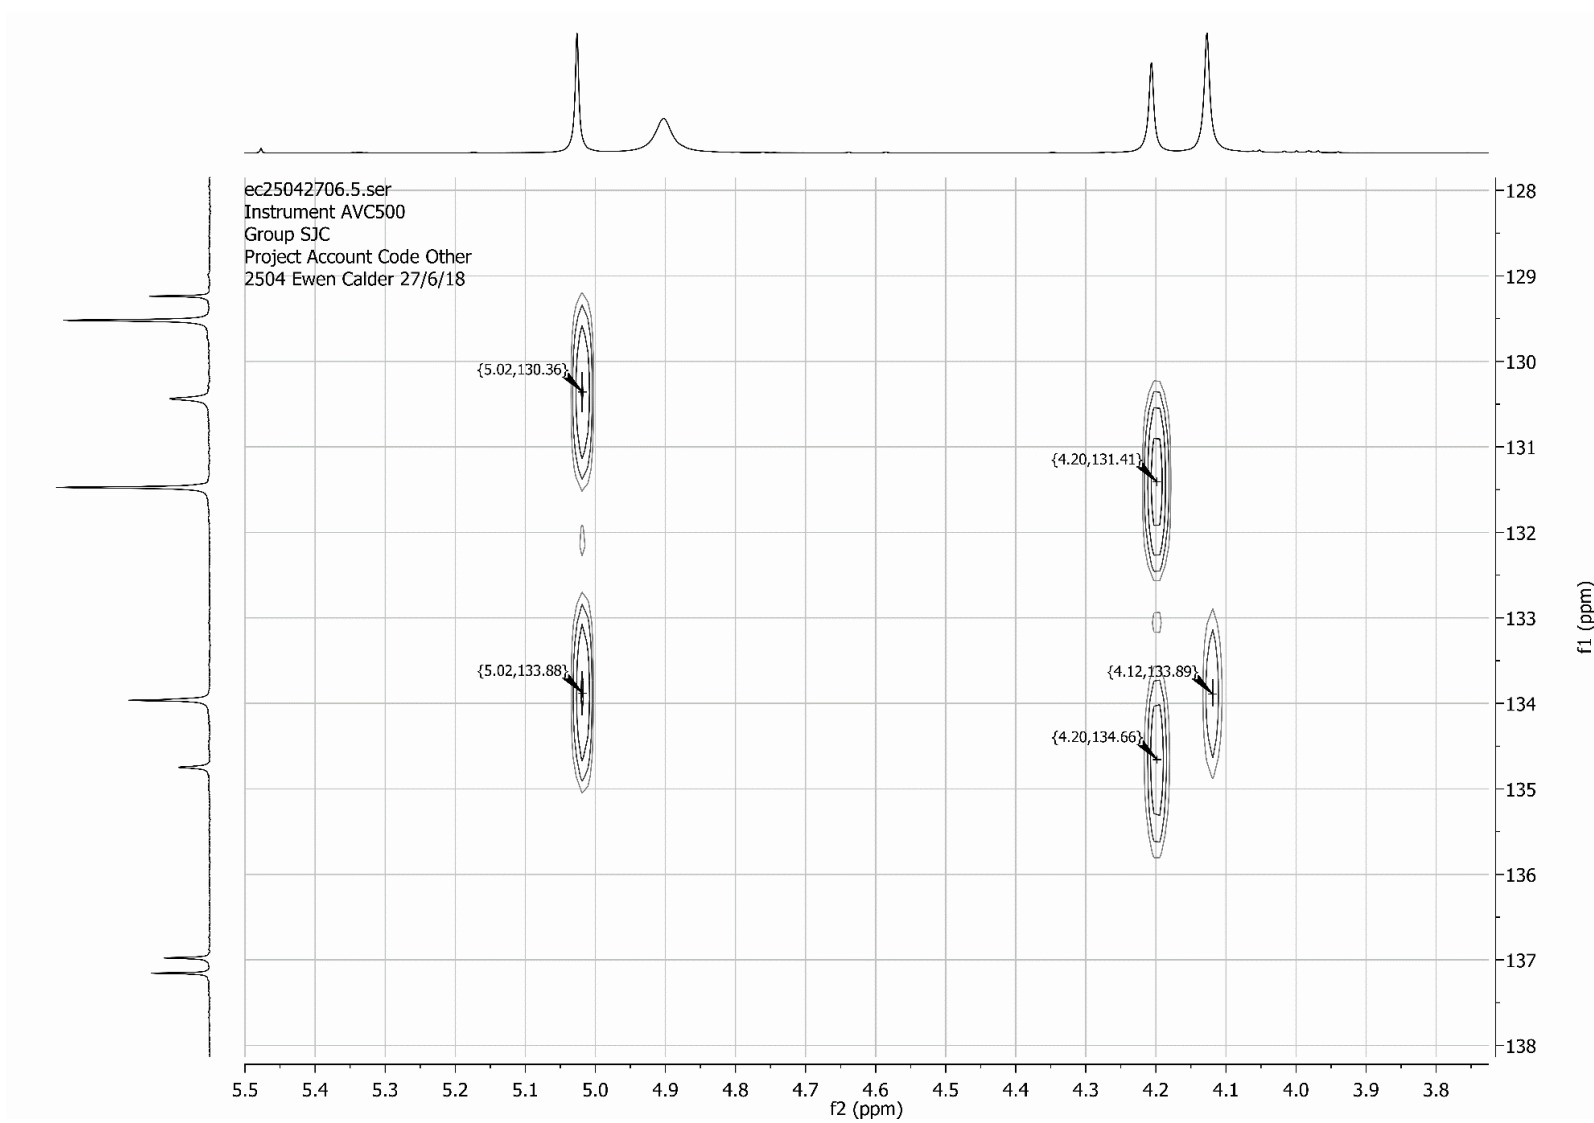

O-((1-Methyl-2-nitroimidazol-5-yl)methyl)-Panobinostat di-trifluoroacetate (CH-03, NI-Pano, 1)

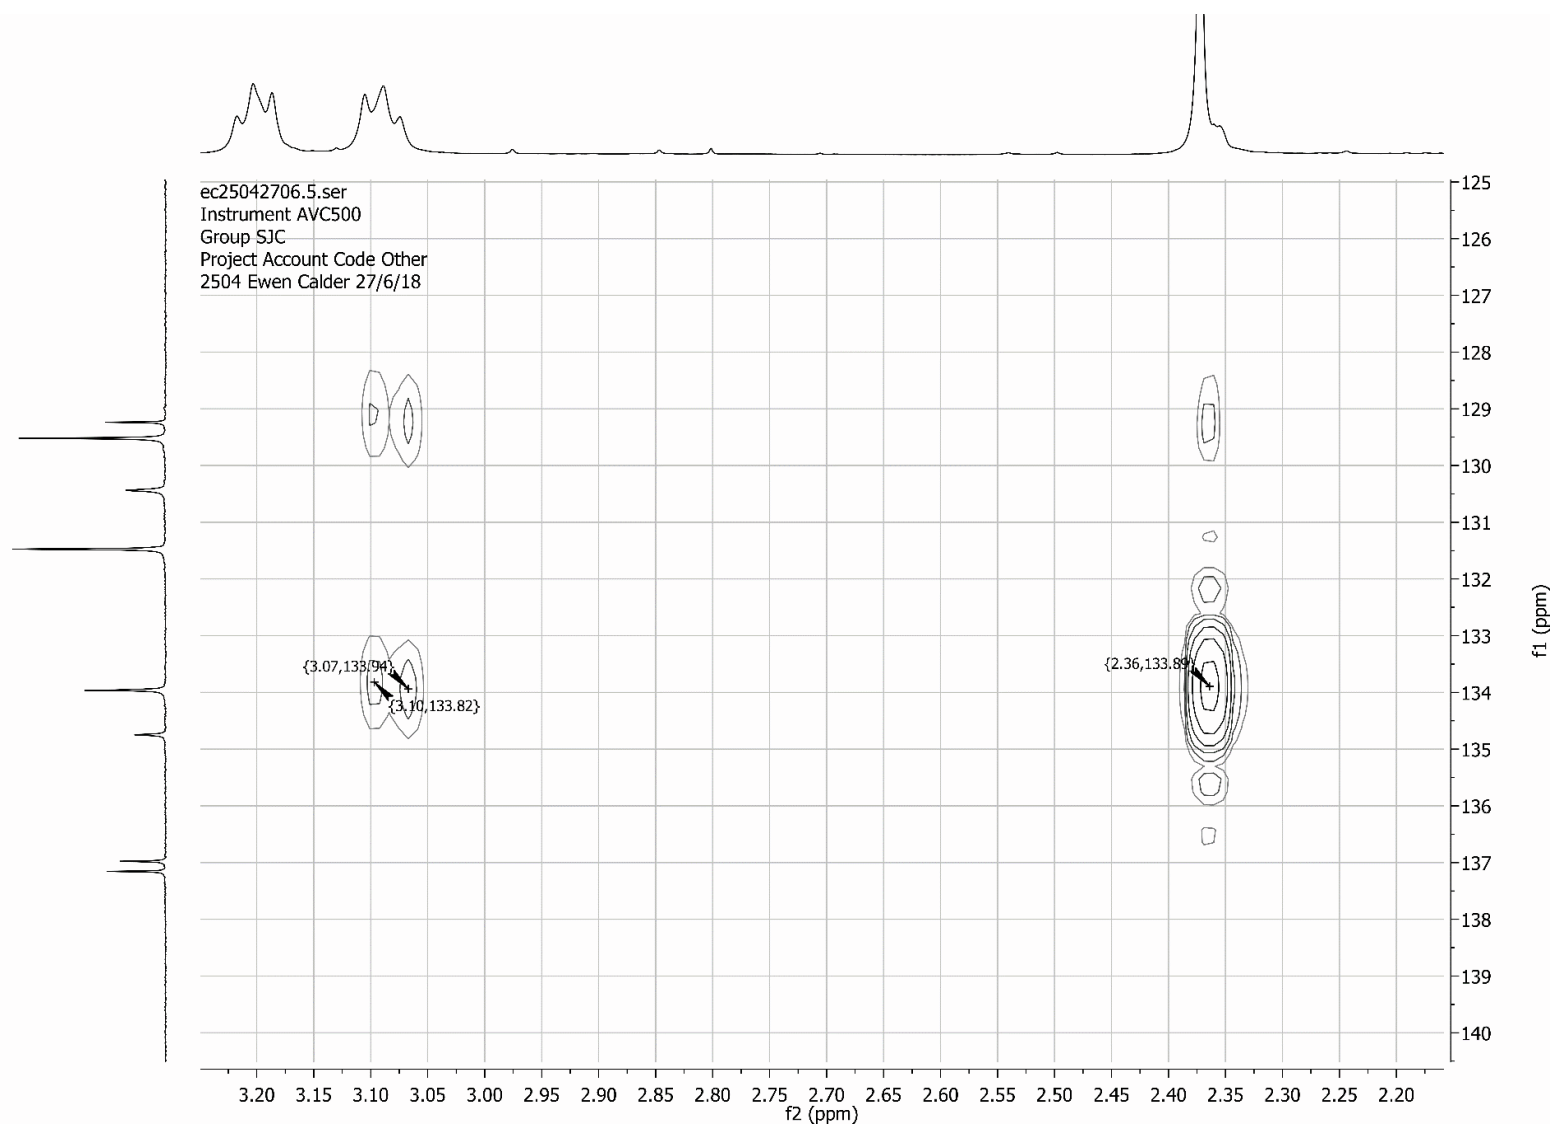

(E)-3-(4-([2-(2-methyl-1H-indol-3-yl)ethylamino)methyl]phenyl)prop-2-enoic acid trifluoroacetate (**S18**)

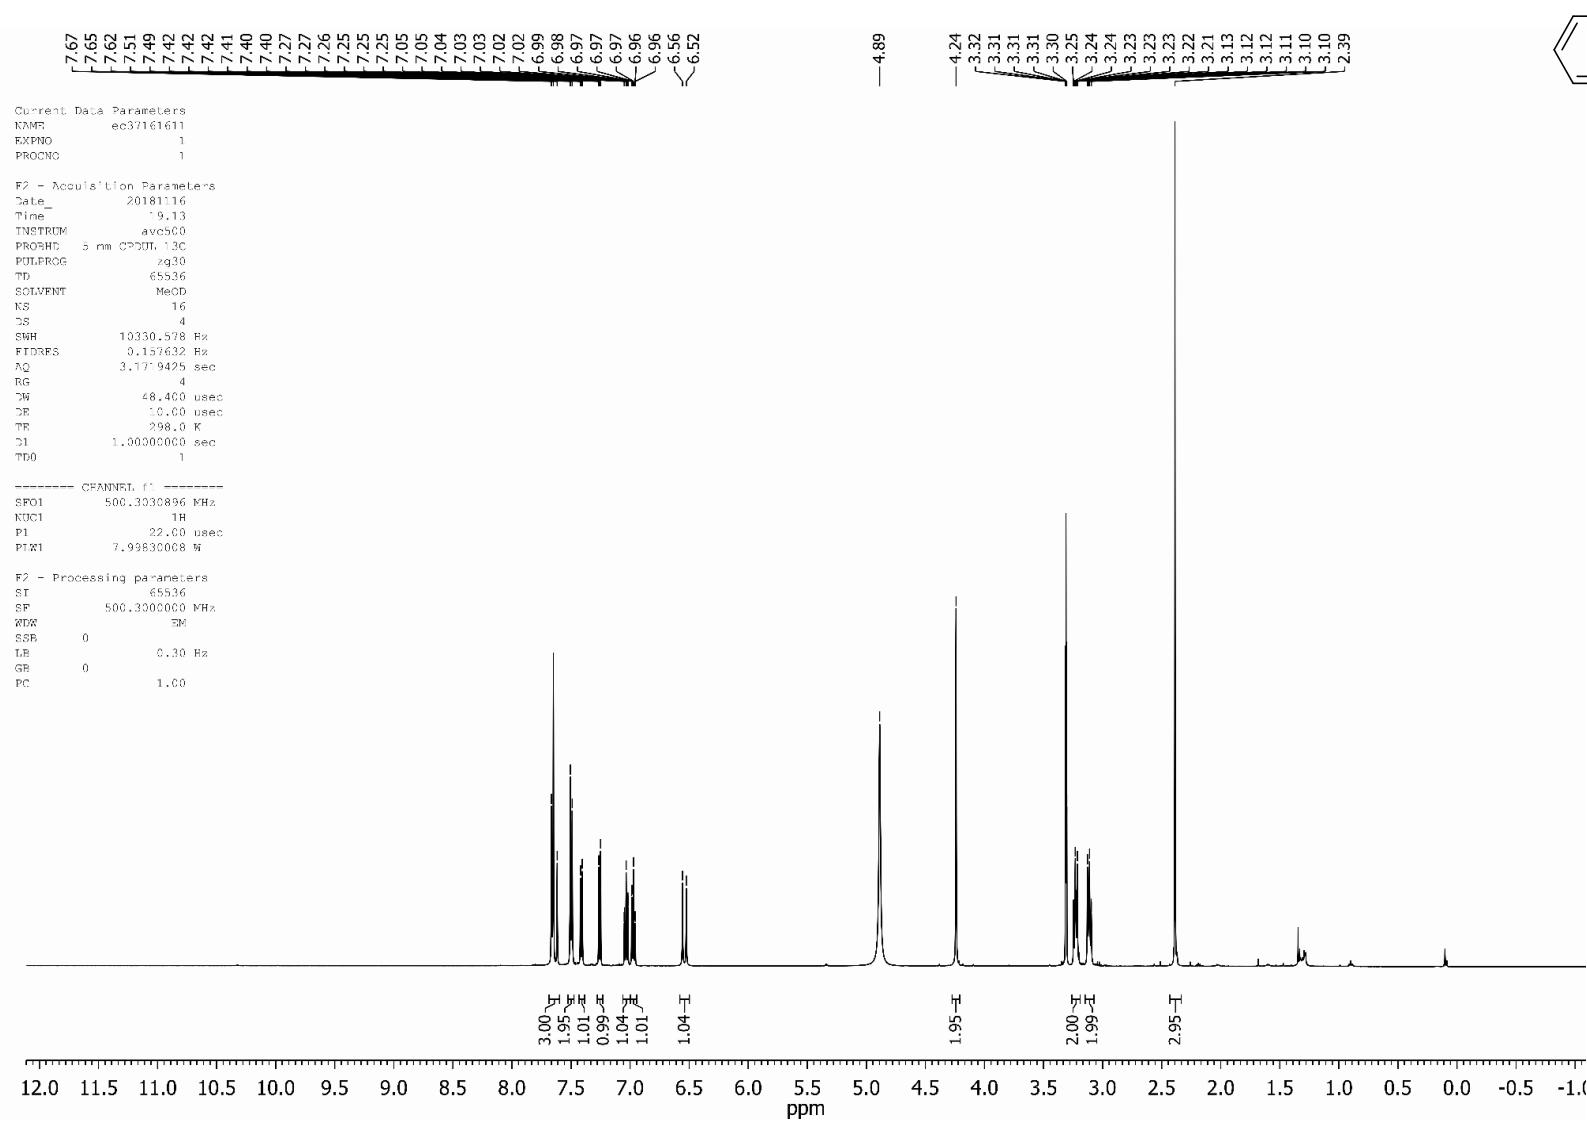

(E)-3-(4-([2-(2-methyl-1H-indol-3-yl)ethylamino]methyl)phenyl)prop-2-enoic acid trifluoroacetate (**S18**)

Current Data Parameters  
NAME ec37161911  
EXPRO 1  
PROCNO 1

F2 - Acquisition Parameters  
Date 20181119  
Time 10.41  
INSTRUM avc500  
PROBHD 5 mm CPDCL 13C  
PULPROG zgpg30  
TD 65536  
SOLVENT MeOD  
NS 2248  
DS 2  
SWH 31250.000 Hz  
FIDRES 0.476837 Hz  
AQ 1.0485760 sec  
RG 912  
SW 16.000 usec  
DE 18.00 usec  
TE 298.3 K  
D1 2.00000000 sec  
D11 0.03000000 sec  
TD0 1

----- CHANNEL f1 -----  
SFO1 125.8131152 MHz  
NUC1 13C  
P1 10.00 usec  
PLW1 20.18400002 W

===== CHANNEL f2 =====  
SFO2 500.3020012 MHz  
NUC2 1H  
CPDPRG2 waltz16  
PCPD2 80.00 usec  
PLW2 7.99830000 W  
PLW12 0.60487002 W  
PLW13 0.38712001 W

F2 - Processing parameters  
SI 32768  
SF 125.8005351 MHz  
WDW EM  
SSB 0  
LA 1.00 Hz  
GB 0  
PC 1.40

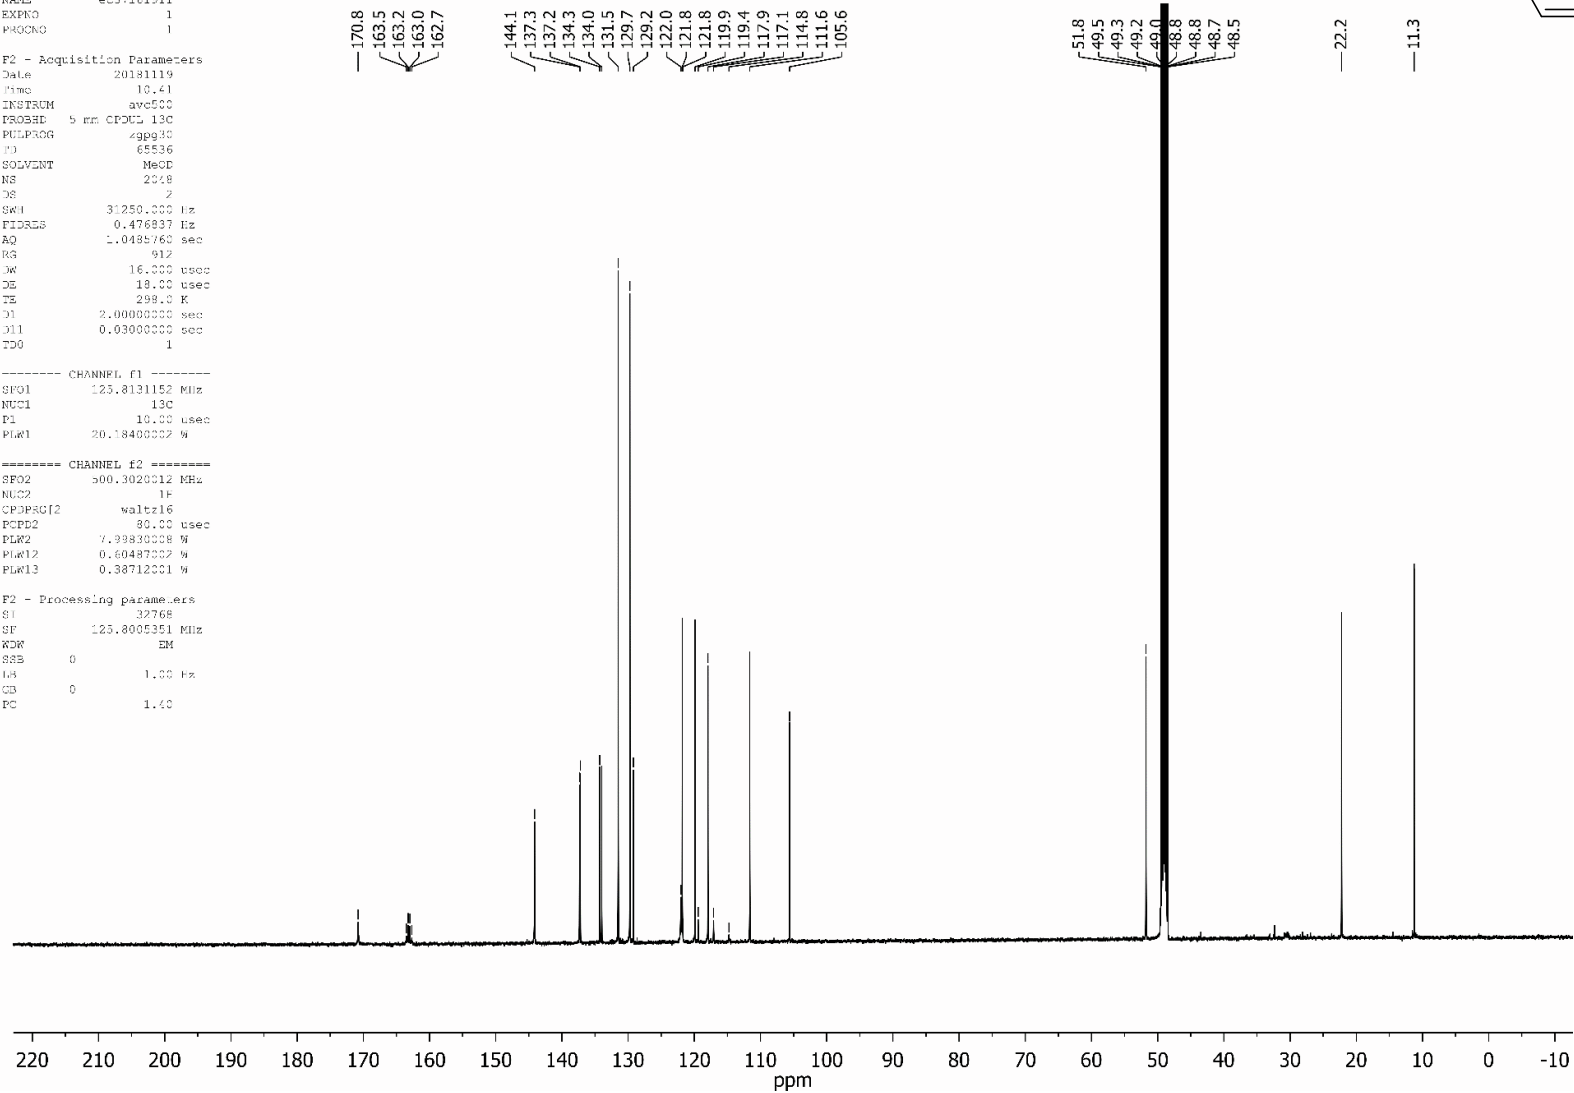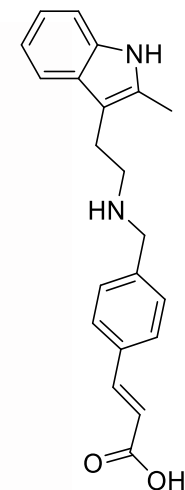

(*E*)-3-(4-([2-(2-methyl-1*H*-indol-3-yl)ethylamino]methyl)phenyl)prop-2-enoic acid trifluoroacetate (**S18**)

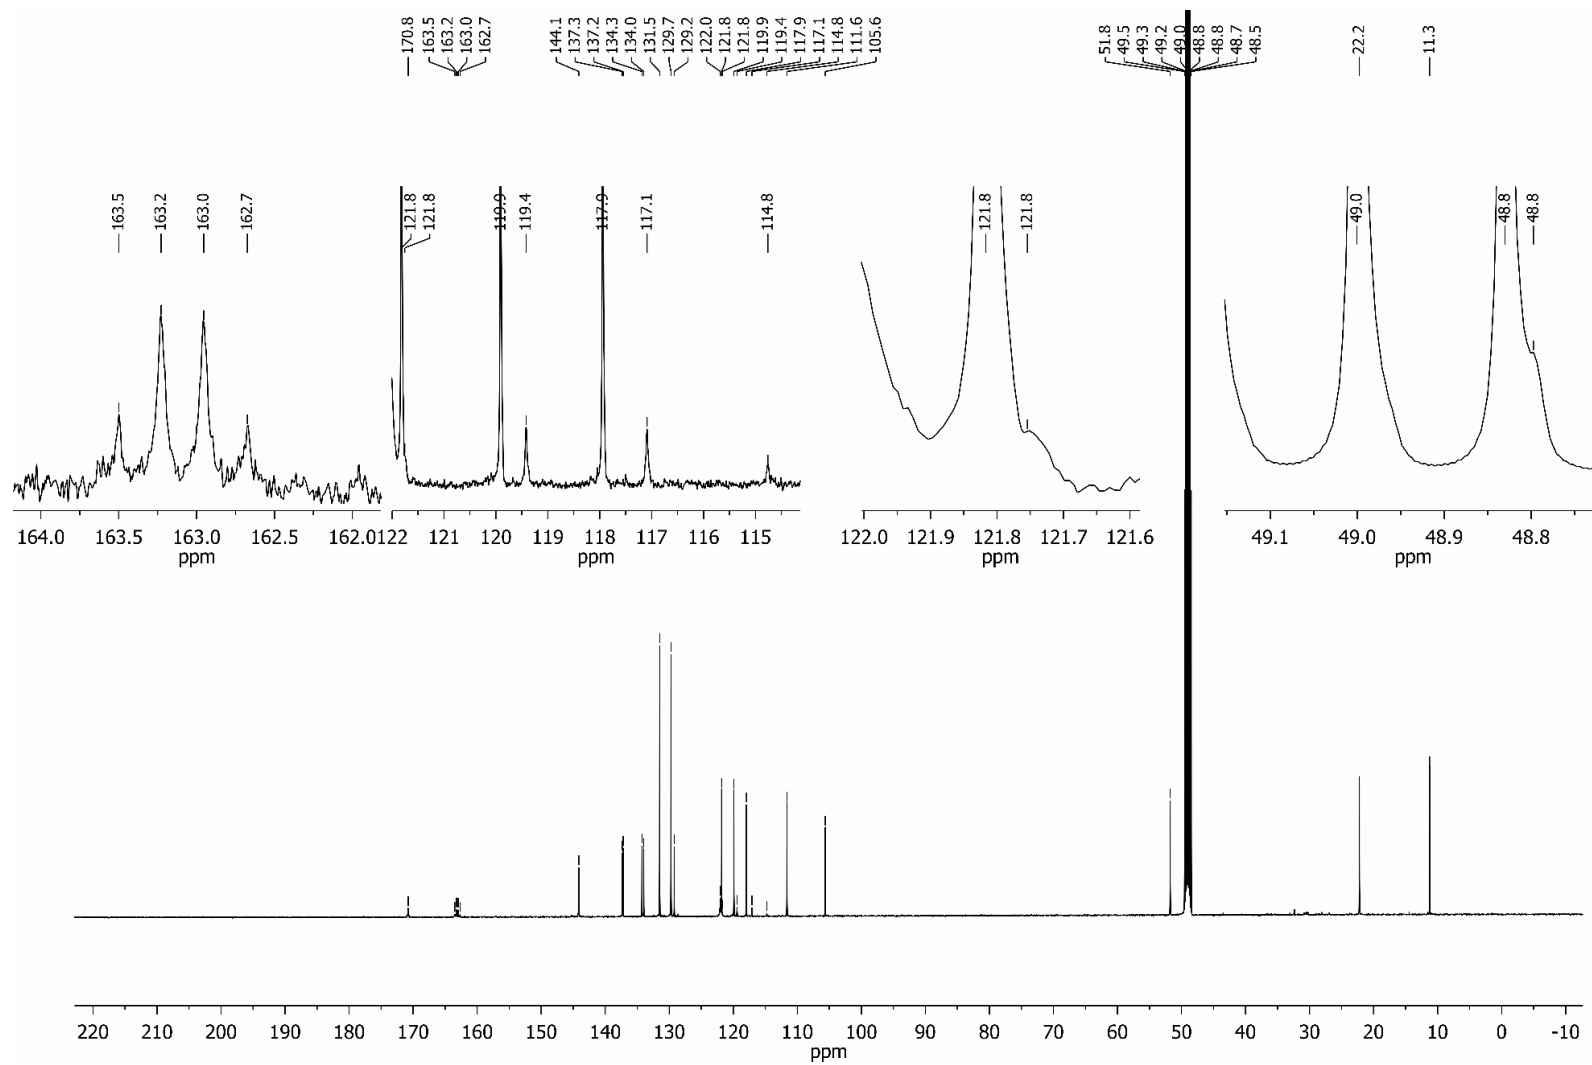

4-((1-Methyl-2-nitro-1*H*-imidazol-5-yl)methoxy)benzaldehyde

Current Data Parameters  
NAME mo604701501 MLOx120  
EXPNO 1  
PROCNO 1

F2 - Acquisition Parameters  
Date\_ 20210117  
Time 9.11  
INSTRUM avc500  
PROBHD 5 mm CPDUL 13C  
PULPROG zg30  
TD 65536  
SOLVENT CDCl3  
NS 16  
DS 4  
SWH 10330.578 Hz  
FIDRES 0.157632 Hz  
AQ 3.1719425 sec  
RG 4  
DW 48.400 usec  
DE 10.00 usec  
TE 298.0 K  
D1 1.00000000 sec  
TD0 1

===== CHANNEL f1 =====  
SFO1 500.3030896 MHz  
NUC1 1H  
P1 22.00 usec  
PLW1 7.99630008 W

F2 - Processing parameters  
SI 65536  
SF 500.3000131 MHz  
WDW EM  
SSB 0  
LB 0.30 Hz  
GB 0  
PC 1.00

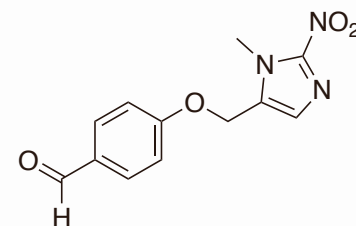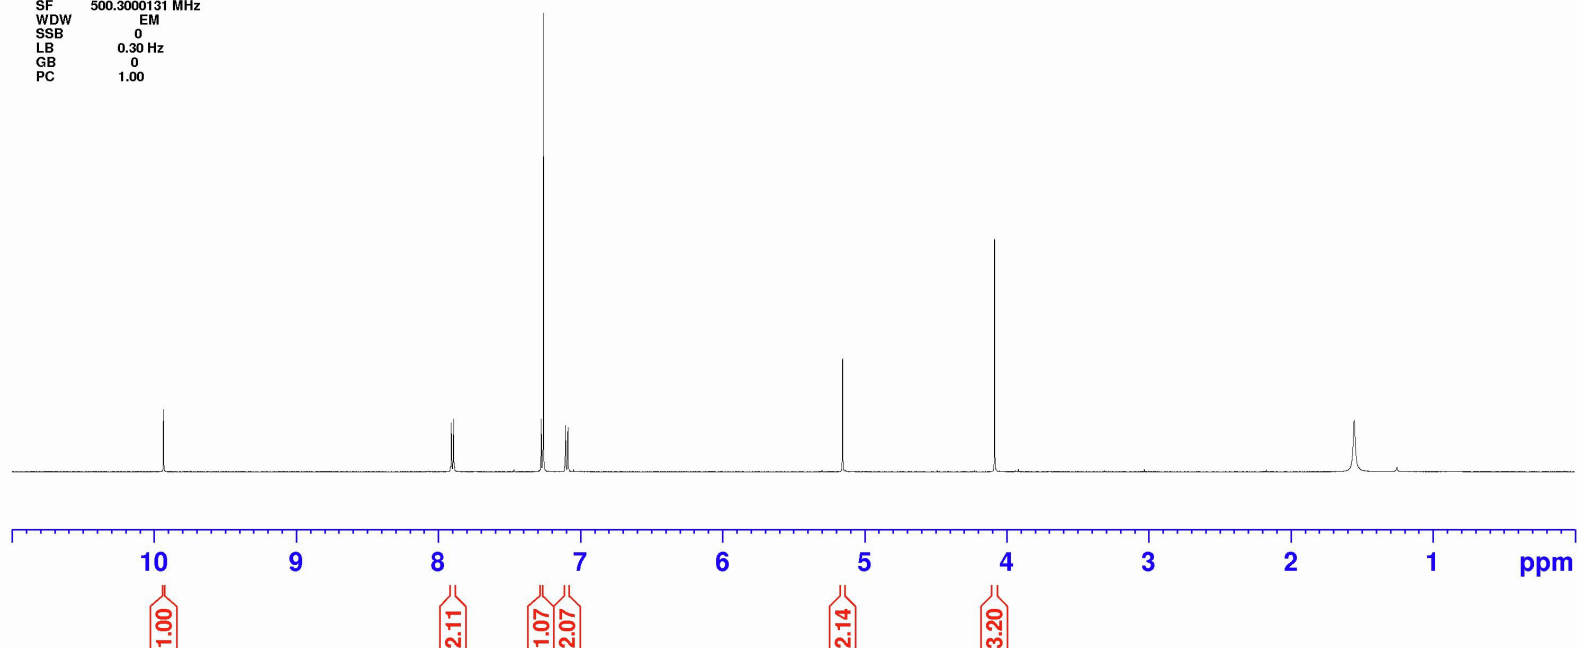

4-((1-Methyl-2-nitro-1*H*-imidazol-5-yl)methoxy)benzaldehyde

Current Data Parameters  
NAME mo604701501 MLOx120  
EXPNO 4  
PROCNO 1

F2 - Acquisition Parameters  
Date\_ 20210117  
Time\_ 12.41  
INSTRUM avc500  
PROBHD 5 mm CPDUL 13C  
PULPROG zgpg30  
TD 65536  
SOLVENT CDCl3  
NS 3072  
DS 2  
SWH 31250.000 Hz  
FIDRES 0.476637 Hz  
AQ 1.0485760 sec  
RG 912  
DW 16.000 usec  
DE 18.00 usec  
TE 298.0 K  
D1 2.00000000 sec  
D11 0.03000000 sec  
TD0 1

===== CHANNEL f1 =====  
SFO1 125.8131152 MHz  
NUC1 13C  
P1 10.00 usec  
PLW1 20.18400002 W

===== CHANNEL f2 =====  
SFO2 500.3020012 MHz  
NUC2 1H  
CPDPRG2 waltz16  
PCPD2 80.00 usec  
PLW2 7.99830008 W  
PLW12 0.60487002 W  
PLW13 0.38712001 W

F2 - Processing parameters  
SI 32768  
SF 125.8005174 MHz  
WDW EM  
SSB 0  
LB 1.00 Hz  
GB 0  
PC 1.40

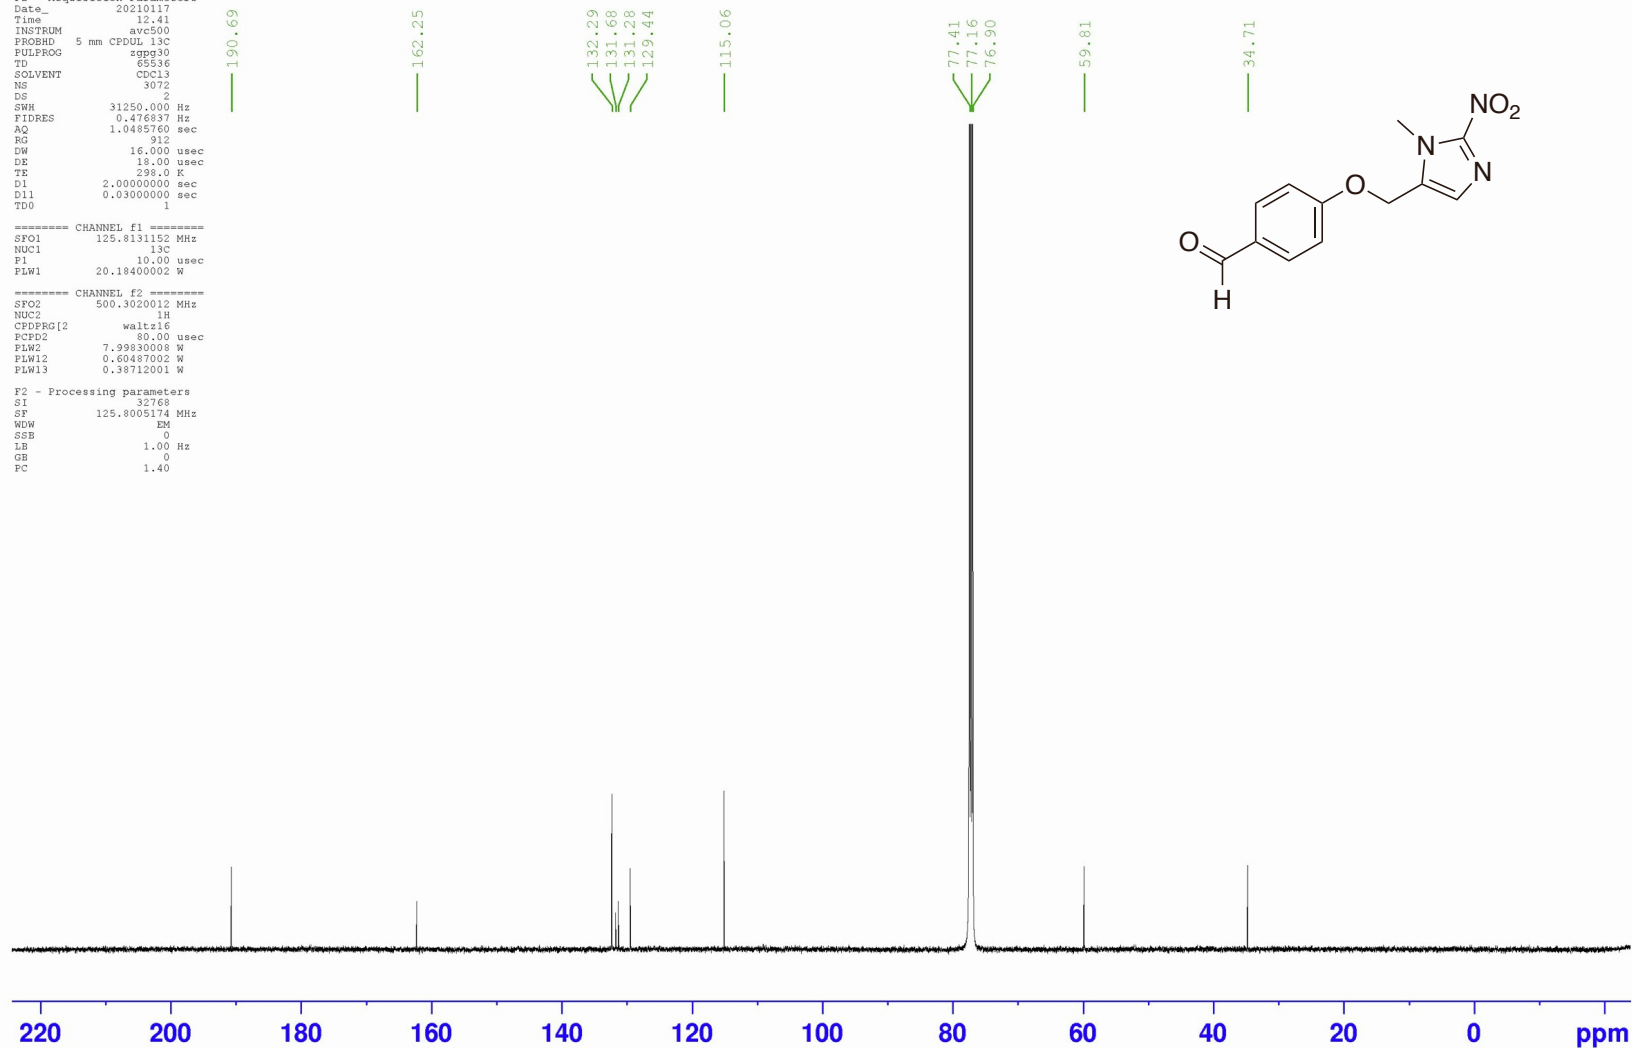



(E)-2-(2-(4-((1-Methyl-2-nitro-1H-imidazol-5-yl)methoxy)styryl)-4H-chromen-4-ylidene)malononitrile

Current Data Parameters  
NAME mo605021801 - MLOx121  
EXPNO 1  
PROCNO 1

F2 - Acquisition Parameters  
Date\_ 20210119  
Time 22.51  
INSTRUM avc500  
PROBHD 5 mm CPDUL 13C  
PULPROG zg30  
TD 65536  
SOLVENT CDCl3  
NS 16  
DS 4  
SWH 10330.578 Hz  
FIDRES 0.157632 Hz  
AQ 3.1719425 sec  
RG 4.5  
DW 48.400 usec  
DE 10.00 usec  
TE 298.0 K  
D1 1.0000000 sec  
TD0 1

===== CHANNEL f1 =====  
SFO1 500.3030896 MHz  
NUC1 1H  
P1 22.00 usec  
PLW1 7.99830008 W

F2 - Processing parameters  
SI 65536  
SF 500.3000129 MHz  
WDW EM  
SSB 0  
LB 0.30 Hz  
GB 0  
PC 1.00

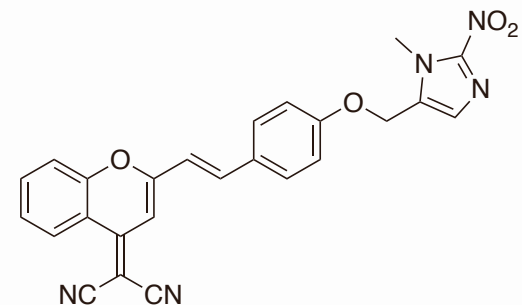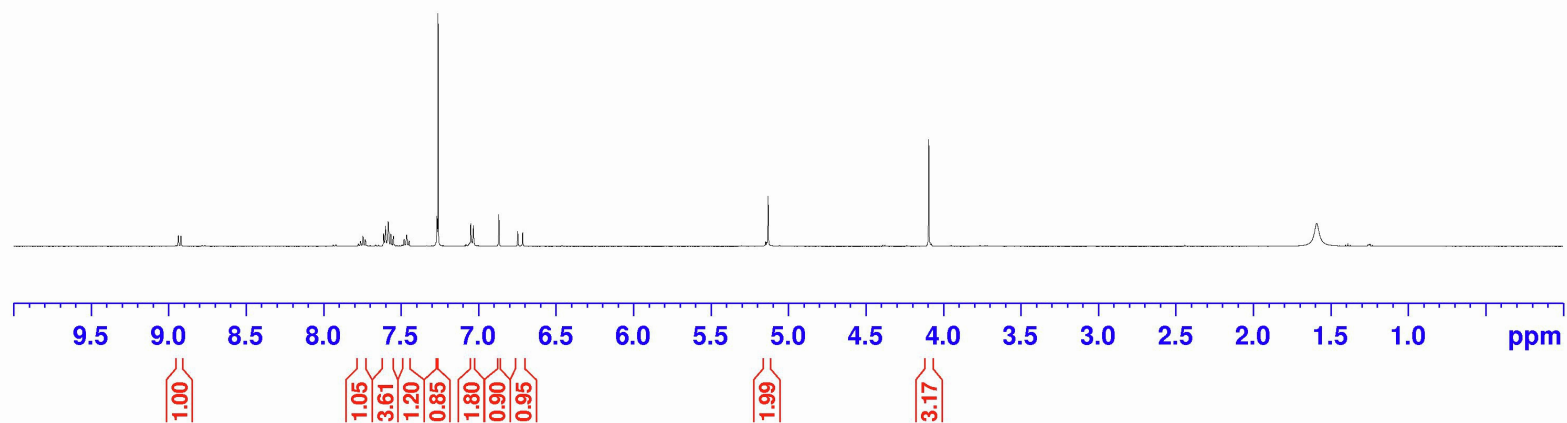

(E)-2-(2-(4-((1-Methyl-2-nitro-1H-imidazol-5-yl)methoxy)styryl)-4H-chromen-4-ylidene)malononitrile

Current Data Parameters  
NAME mo605021801 - MLOx121  
EXPNO 4  
PROCNO 1

F2 - Acquisition Parameters  
Date\_ 20210120  
Time 2.59  
INSTRUM avc500  
PROBHD 5 mm CPDUL 13C  
PULPROG zgpg30  
TD 65536  
SOLVENT CDCl3  
NS 3072  
DS 2  
SWH 31250.000 Hz  
FIDRES 0.476837 Hz  
AQ 1.0485760 sec  
RG 912  
DM 16.000 usec  
DE 18.00 usec  
TE 298.0 K  
D1 2.00000000 sec  
D11 0.03000000 sec  
TD0 1

===== CHANNEL f1 =====  
SFO1 125.8131152 MHz  
NUC1 13C  
P1 10.00 usec  
PLW1 20.18400002 W

===== CHANNEL f2 =====  
SFO2 500.3020012 MHz  
NUC2 1H  
CPDPRG2 waltz16  
PCPD2 80.00 usec  
PLW2 7.99830008 W  
PLW12 0.60487002 W  
PLW13 0.38712001 W

F2 - Processing parameters  
SI 32768  
SF 125.8005182 MHz  
WDW EM  
SSB 0  
LB 1.00 Hz  
GB 0  
PC 1.40

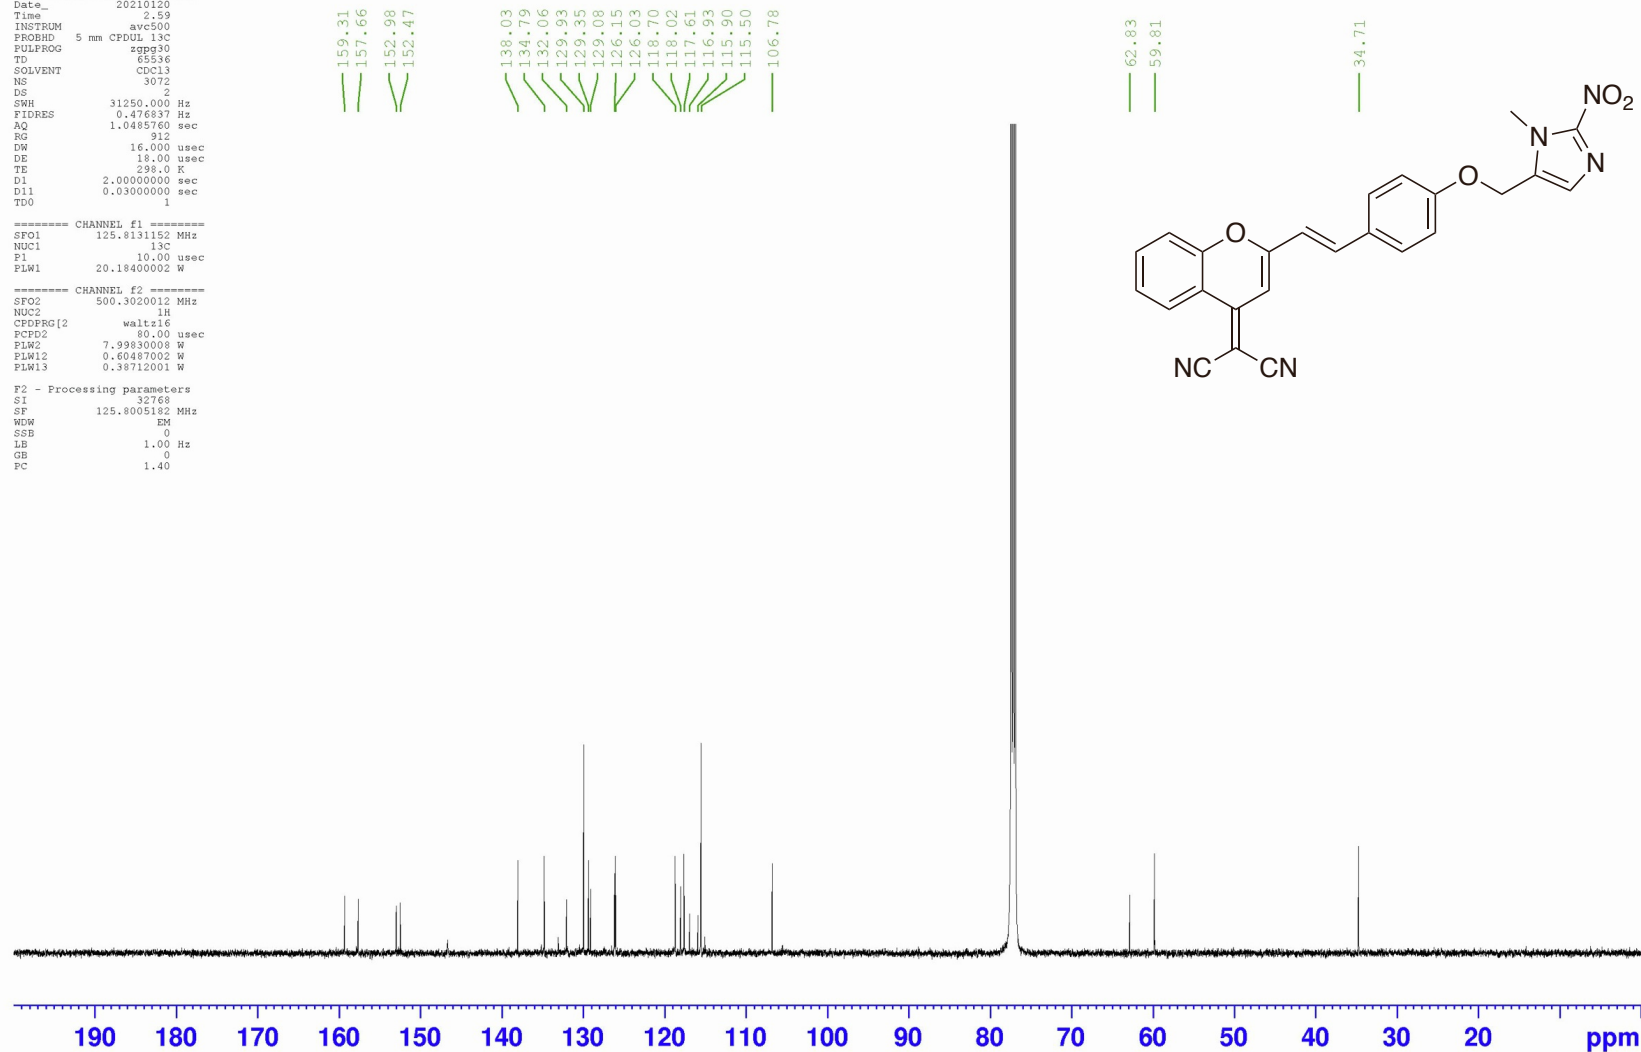

Methyl (E)-3-(4-([2-(2-methyl-1H-indol-3-yl)ethylamino]methyl)phenyl)prop-2-enoate (3)

EC2-10

Purity short run @254 nm

2/1/2017 8:37 pm

Sample Name EC2-10  
Vial Number 6  
Injection Volume 5  
Acquisition Date/Time 1/31/2017 6:02 pm  
Acquisition Method Purity short run @254 nm  
Processing Method Purity short run @254 nm

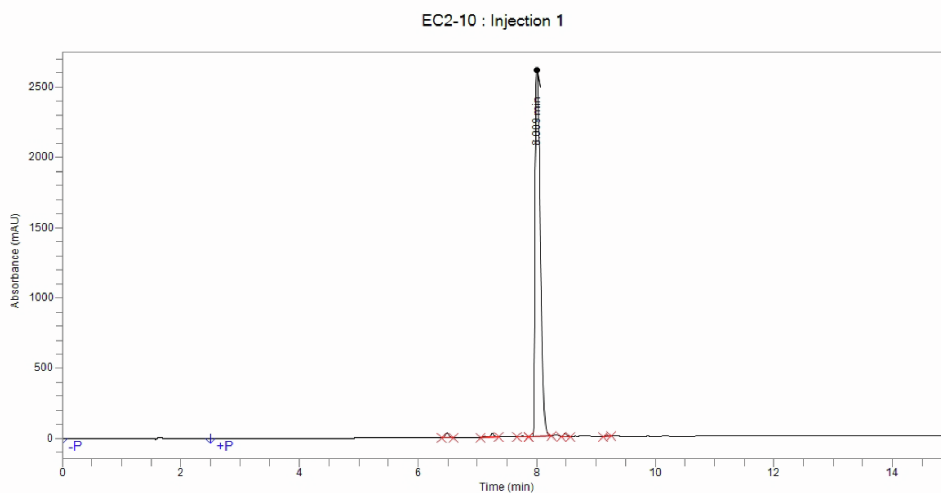

| Time         | Area                | Area %        |
|--------------|---------------------|---------------|
| 6.492        | 142,182.4           | 0.86          |
| 7.131        | 27,766.8            | 0.17          |
| 7.257        | 110,631.7           | 0.67          |
| 7.753        | 39,724.4            | 0.24          |
| 8.009        | 16,026,271.6        | 97.35         |
| 8.475        | 88,047.3            | 0.53          |
| 9.188        | 28,156.0            | 0.17          |
| <b>Total</b> | <b>16,462,780.3</b> | <b>100.00</b> |

2/1/2017 8:37 pm

Flexar HPLC 2

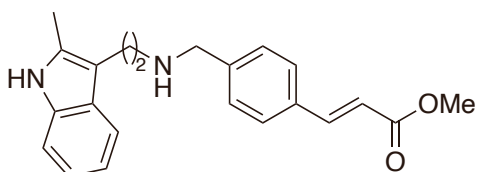

# Panobinostat (2)

EC4-14 Pano

2/26/2018

Acquisition Method Purity short run @254 nm  
 Acquisition Date/Time 2/26/2018 6:56 pm  
 Injection Volume 10  
 Sample Name EC4-14 Pano  
 Sample Description

EC4-14 Pano : Injection 1

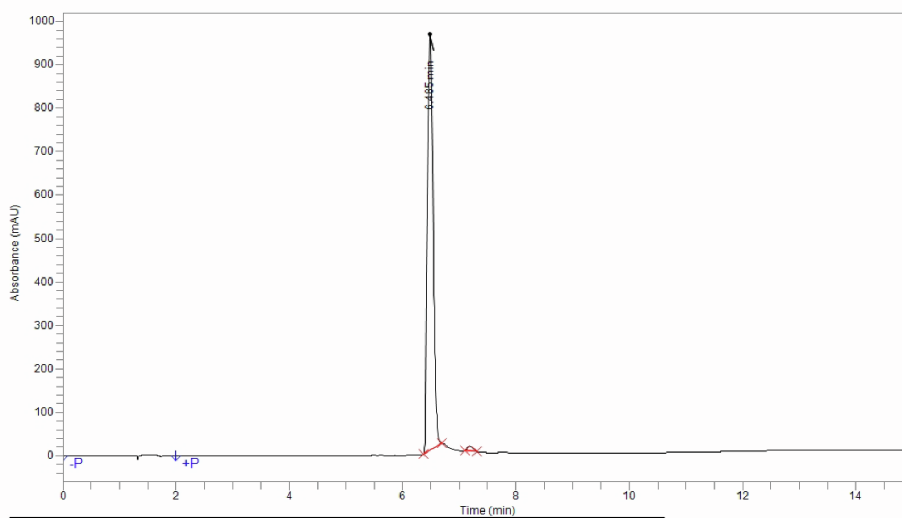

| Time         | Height    | Area        | Area % |
|--------------|-----------|-------------|--------|
| 6.485        | 958,967.0 | 6,619,001.0 | 98.81  |
| 7.183        | 11,494.8  | 79,439.7    | 1.19   |
| <b>Total</b> |           | 6,698,440.7 | 100.00 |

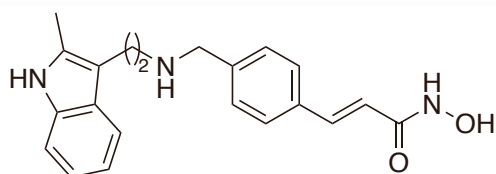

(5-Nitrothiophen-2-yl)methyl bromide (S9)

EC4-63

9/11/2018

Acquisition Method Purity short run @254 nm  
Acquisition Date/Time 6/25/2018 4:14 pm  
Injection Volume 10  
Sample Name EC4-63  
Sample Description  
Batch Description

EC4-63 : Injection 1

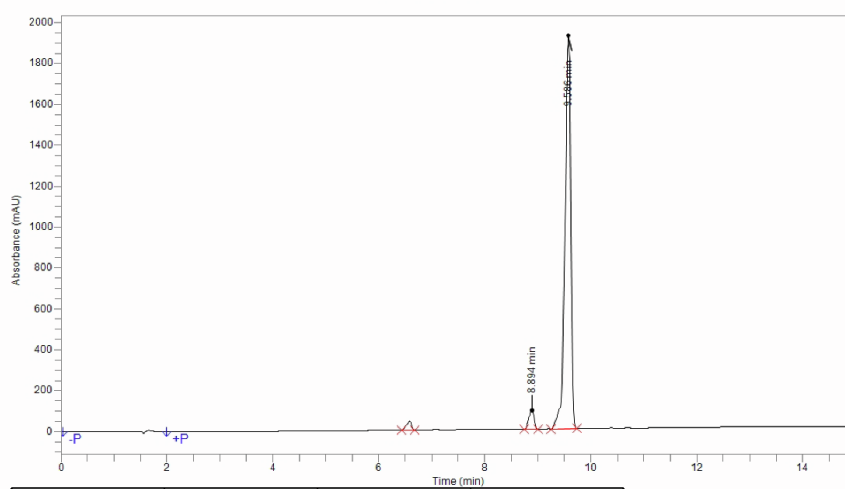

| Time         | Height      | Area         | Area % |
|--------------|-------------|--------------|--------|
| 6.585        | 43,937.1    | 298,598.4    | 1.88   |
| 8.894        | 91,542.3    | 599,907.0    | 3.78   |
| 9.586        | 1,923,605.5 | 14,976,498.3 | 94.34  |
| <b>Total</b> |             | 15,875,003.6 | 100.00 |

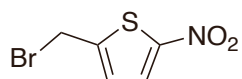

*N*-Phthalimido-*O*-(5-nitrothiophen-2-yl)-hydroxylamine

EC4-68

9/11/2018

Acquisition Method Purity short run @254 nm  
Acquisition Date/Time 7/3/2018 5:41 pm  
Injection Volume 10  
Sample Name EC4-68  
Sample Description  
Batch Description

EC4-68 : Injection 1

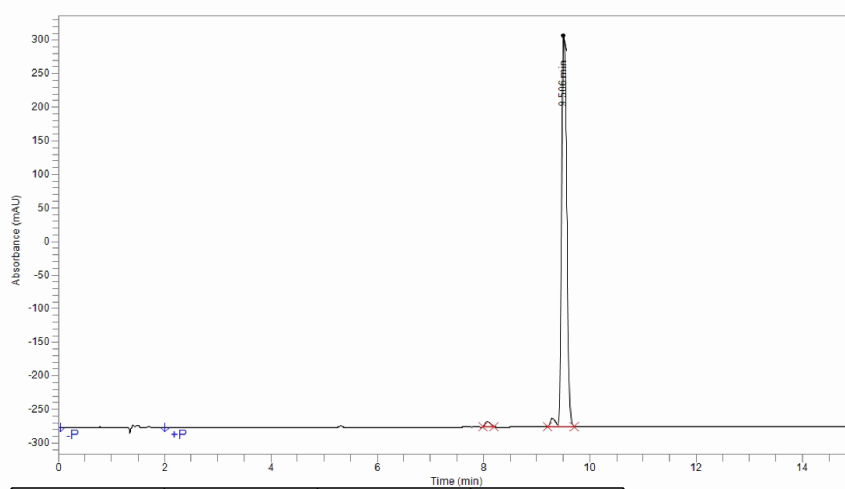

| Time         | Height    | Area        | Area % |
|--------------|-----------|-------------|--------|
| 8.071        | 8,336.6   | 51,781.2    | 1.29   |
| 9.292        | 12,498.6  | 81,327.4    | 2.03   |
| 9.506        | 582,893.5 | 3,865,476.7 | 96.67  |
| <b>Total</b> |           | 3,998,585.4 | 100.00 |

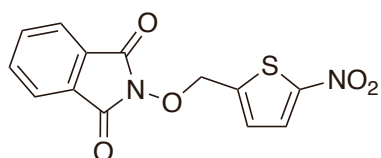

*O*-(5-Nitrothiophen-2-yl)-hydroxylamine (**S10**)

EC4-90

10/1/2018

Acquisition Method Purity short run @254 nm  
 Acquisition Date/Time 10/1/2018 2:41 pm  
 Injection Volume 10  
 Sample Name EC4-90  
 Sample Description  
 Batch Description

EC4-90 : Injection 1

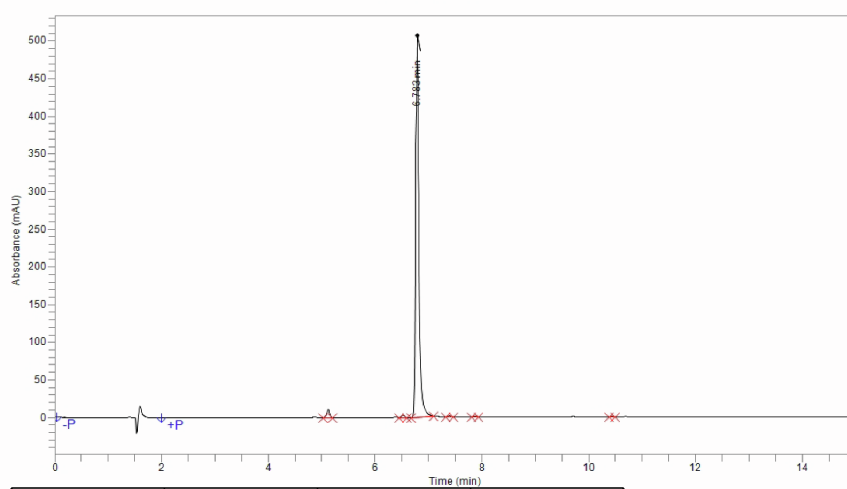

| Time         | Height    | Area        | Area % |
|--------------|-----------|-------------|--------|
| 5.119        | 11,409.7  | 44,269.3    | 1.93   |
| 6.518        | 3,648.0   | 13,869.0    | 0.61   |
| 6.783        | 507,580.5 | 2,210,708.1 | 96.60  |
| 7.387        | 2,336.8   | 8,811.9     | 0.39   |
| 7.870        | 1,697.5   | 6,964.7     | 0.30   |
| 10.436       | 1,216.3   | 3,794.2     | 0.17   |
| <b>Total</b> |           | 2,288,417.3 | 100.00 |

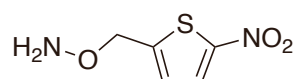

# N-Phthalimido-O-(6-nitroquinolin-5-yl)-hydroxylamine

EC3-88

9/12/2018

Acquisition Method Purity short run @254 nm  
 Acquisition Date/Time 1/8/2018 1:50 pm  
 Injection Volume 20  
 Sample Name EC3-88  
 Sample Description  
 Batch Description

EC3-88 : Injection 1

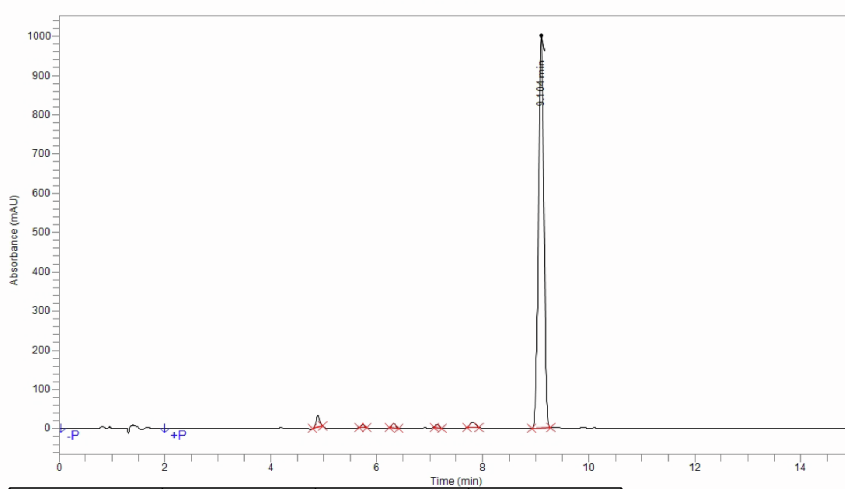

| Time         | Height      | Area        | Area % |
|--------------|-------------|-------------|--------|
| 4.891        | 29,133.4    | 145,138.3   | 1.98   |
| 5.735        | 6,556.7     | 31,610.1    | 0.43   |
| 6.319        | 11,319.6    | 57,009.5    | 0.78   |
| 7.138        | 6,535.2     | 32,462.8    | 0.44   |
| 7.807        | 13,451.0    | 94,303.7    | 1.28   |
| 9.104        | 1,001,339.3 | 6,982,876.3 | 95.09  |
| <b>Total</b> |             | 7,343,400.6 | 100.00 |

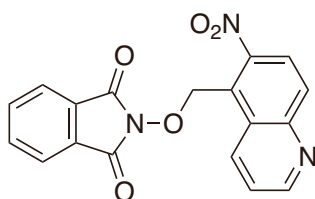



# O-(6-Nitroquinolin-5-yl)-hydroxylamine (S14)

EC3-89

9/12/2018

Acquisition Method Purity short run @254 nm  
 Acquisition Date/Time 1/8/2018 2:25 pm  
 Injection Volume 20  
 Sample Name EC3-89  
 Sample Description  
 Batch Description

EC3-89 : Injection 1

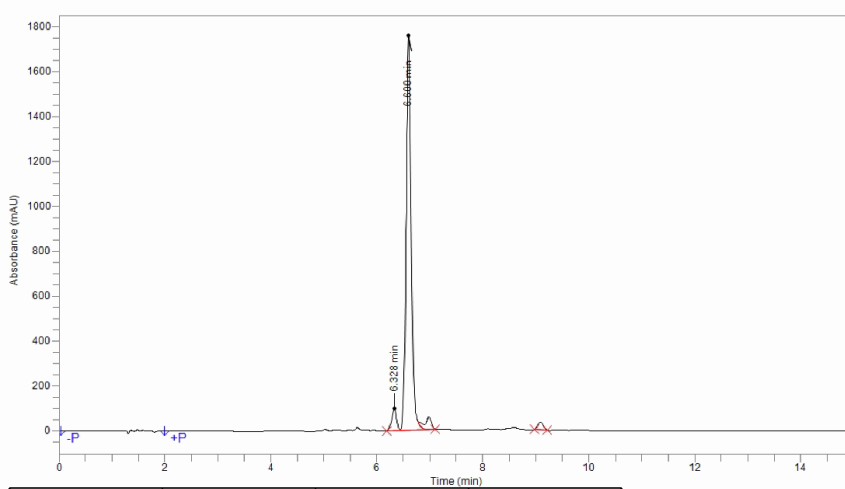

| Time         | Height      | Area         | Area % |
|--------------|-------------|--------------|--------|
| 6.328        | 99,800.0    | 620,898.6    | 4.75   |
| 6.600        | 1,756,176.4 | 11,754,905.5 | 89.95  |
| 6.986        | 53,118.9    | 455,530.4    | 3.49   |
| 9.092        | 34,047.3    | 236,249.0    | 1.81   |
| <b>Total</b> |             | 13,067,583.6 | 100.00 |

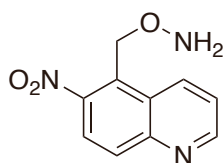

Methyl (E)-3-(4-([*tert*-butyloxycarbonyl-(2-{1-[*tert*-butyloxycarbonyl]-2-methyl-1*H*-indol-3-yl)ethyl]amino)methyl}phenyl)prop-2-enoate (**4**)

EC2-38

Purity short run @254 nm

2/1/2017 1:48 pm

Sample Name EC2-38  
Vial Number 1  
Injection Volume 10  
Acquisition Date/Time 2/1/2017 9:45 am  
Acquisition Method Purity short run @254 nm  
Processing Method Purity short run @254 nm

EC2-38 : Injection 1

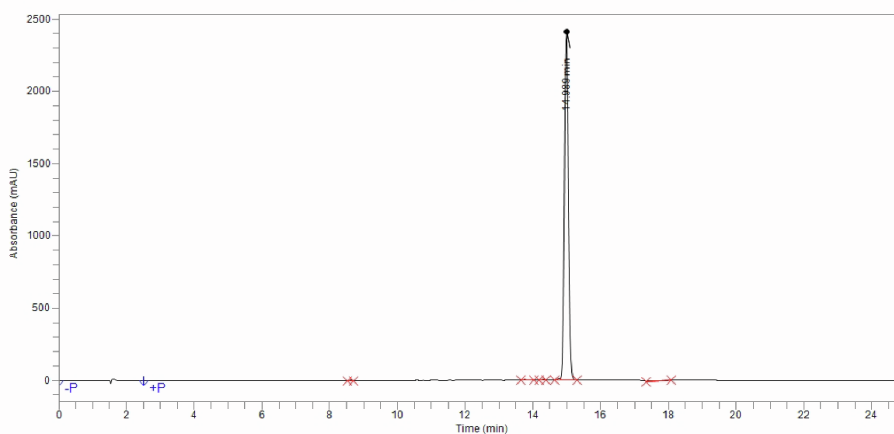

| Time         | Area                | Area %        |
|--------------|---------------------|---------------|
| 8.624        | 8,997.7             | 0.05          |
| 13.759       | 34,580.5            | 0.18          |
| 13.941       | 13,625.3            | 0.07          |
| 14.296       | 33,348.9            | 0.17          |
| 14.789       | 82,617.3            | 0.43          |
| 14.989       | 18,982,727.6        | 98.24         |
| 18.018       | 167,802.4           | 0.87          |
| <b>Total</b> | <b>19,323,699.6</b> | <b>100.00</b> |

2/1/2017 1:48 pm

Flexar HPLC 2

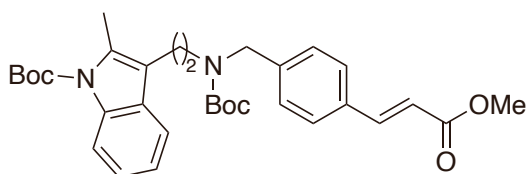

**(E)-3-(4-([*tert*-Butyloxycarbonyl-(2-{1-[*tert*-butyloxycarbonyl]-2-methyl-1*H*-indol-3-yl}ethyl)amino]methyl)phenyl)prop-2-enoic acid (5)**

**EC2-39**

**EC Purity short run @254 nm longer**

**2/2/2017 5:15 pm**

Sample Name EC2-39  
 Vial Number 7  
 Injection Volume 5  
 Acquisition Date/Time 2/2/2017 4:55 pm  
 Acquisition Method EC Purity short run @254 nm longer  
 Processing Method EC Purity short run @254 nm longer

EC2-39 : Injection 1

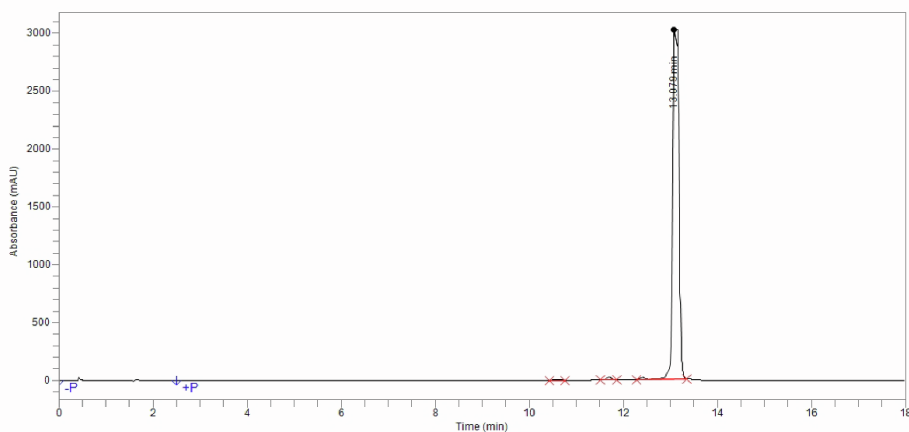

| Time         | Area                | Area %        |
|--------------|---------------------|---------------|
| 10.601       | 49,007.8            | 0.17          |
| 11.713       | 182,154.1           | 0.63          |
| 12.427       | 140,338.8           | 0.48          |
| 13.079       | 28,606,702.2        | 98.72         |
| <b>Total</b> | <b>28,978,202.8</b> | <b>100.00</b> |

**2/2/2017 5:15 pm**

**Flexar HPLC 2**

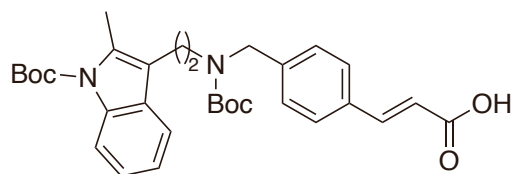

*N,N*-Di-Boc-*O*-benzyl-panobinostat (**6**)

EC4-92

10/10/2018

|                       |                          |
|-----------------------|--------------------------|
| Acquisition Method    | Purity short run @254 nm |
| Acquisition Date/Time | 10/10/2018 12:27 pm      |
| Injection Volume      | 10                       |
| Sample Name           | EC4-92                   |
| Sample Description    |                          |
| Batch Description     |                          |

EC4-92 : Injection 1

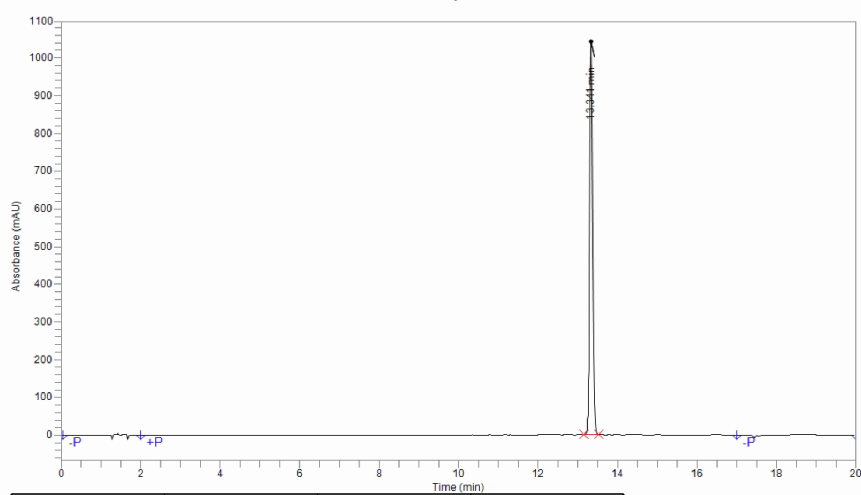

| Time (min)   |             |             |        |
|--------------|-------------|-------------|--------|
| Time         | Height      | Area        | Area % |
| 13.341       | 1,044,426.9 | 5,146,725.1 | 100.00 |
| <b>Total</b> |             | 5,146,725.1 | 100.00 |

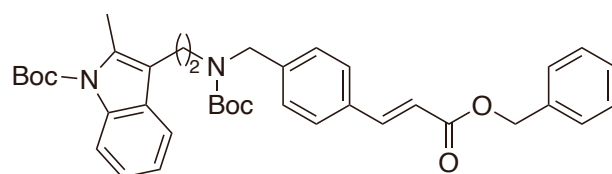

*N,N*-Di-Boc-*O*-(4-nitrobenzyl)-panobinostat (**7**)

EC4-61

9/19/2018

Acquisition Method Purity short run @254 nm  
 Acquisition Date/Time 6/22/2018 4:51 pm  
 Injection Volume 10  
 Sample Name EC4-61  
 Sample Description  
 Batch Description

EC4-61 : Injection 1

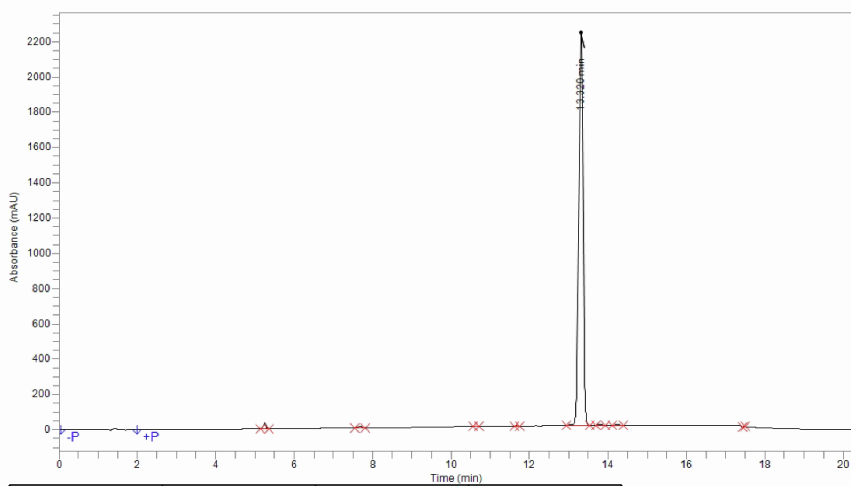

| Time         | Height      | Area         | Area % |
|--------------|-------------|--------------|--------|
| 5.258        | 33,504.5    | 167,128.0    | 0.96   |
| 7.687        | 10,754.0    | 76,820.7     | 0.44   |
| 10.632       | 2,487.5     | 12,000.8     | 0.07   |
| 11.671       | 2,152.6     | 9,633.4      | 0.06   |
| 13.320       | 2,229,257.0 | 17,107,225.8 | 98.04  |
| 13.802       | 3,814.4     | 30,947.5     | 0.18   |
| 14.244       | 4,433.2     | 38,467.9     | 0.22   |
| 17.455       | 2,460.5     | 6,740.1      | 0.04   |
| <b>Total</b> |             | 17,448,964.1 | 100.00 |

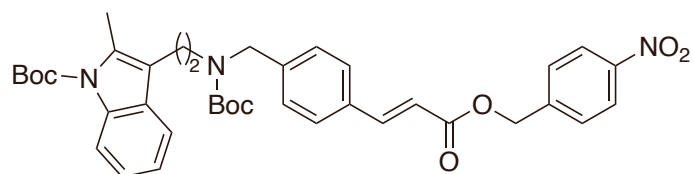

*N,N*-Di-Boc-*O*-(2-nitrothiophen-5-yl)methyl)-panobinostat (**8**)

EC2-35

EC Purity short run @254 nm longer

2/1/2017 6:23 pm

|                       |                                    |
|-----------------------|------------------------------------|
| Sample Name           | EC2-35                             |
| Vial Number           | 12                                 |
| Injection Volume      | 10                                 |
| Acquisition Date/Time | 2/1/2017 5:38 pm                   |
| Acquisition Method    | EC Purity short run @254 nm longer |
| Processing Method     | EC Purity short run @254 nm longer |

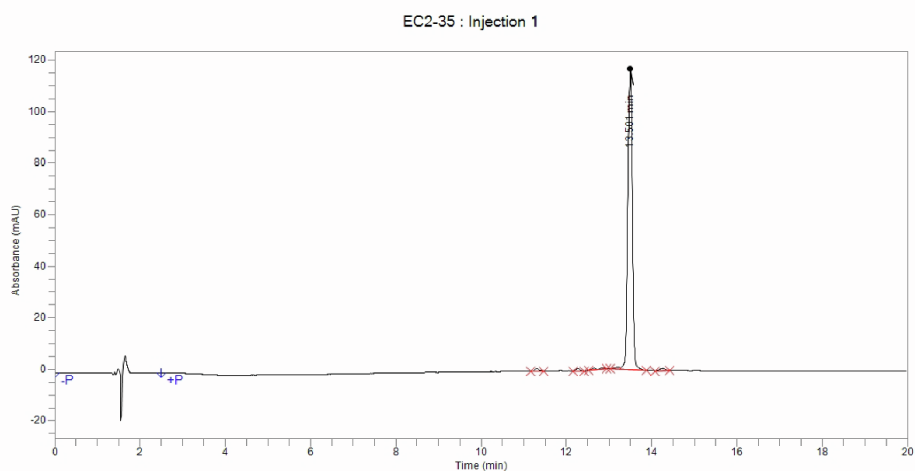

| Time         | Area             | Area %        |
|--------------|------------------|---------------|
| 11.309       | 7,739.2          | 0.88          |
| 12.284       | 5,856.3          | 0.67          |
| 12.649       | 5,843.2          | 0.66          |
| 12.853       | 3,870.5          | 0.44          |
| 13.185       | 6,107.3          | 0.69          |
| 13.501       | 840,590.3        | 95.64         |
| 14.270       | 8,871.3          | 1.01          |
| <b>Total</b> | <b>878,878.1</b> | <b>100.00</b> |

2/1/2017 6:23 pm

Flexar HPLC 2

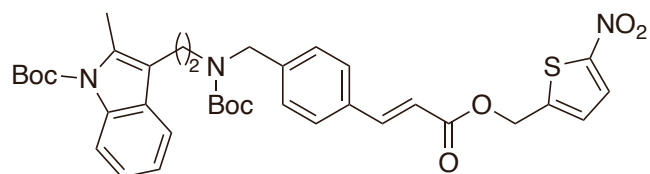

*N,N*-Di-Boc-*O*-((6-nitroquinolin-5-yl)methyl)-panobinostat (9)

EC3-90

9/20/2018

Acquisition Method Purity short run @254 nm  
 Acquisition Date/Time 1/8/2018 3:01 pm  
 Injection Volume 10  
 Sample Name EC3-90  
 Sample Description  
 Batch Description

EC3-90 : Injection 1

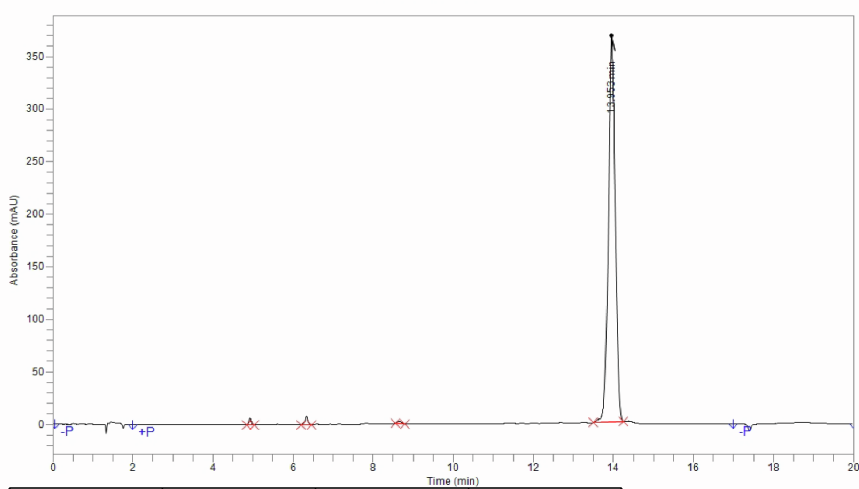

| Time         | Height    | Area        | Area % |
|--------------|-----------|-------------|--------|
| 4.927        | 6,738.4   | 31,633.7    | 0.70   |
| 6.332        | 7,877.7   | 48,338.7    | 1.07   |
| 8.658        | 2,341.0   | 16,158.8    | 0.36   |
| 13.953       | 368,327.9 | 4,423,922.2 | 97.87  |
| <b>Total</b> |           | 4,520,053.3 | 100.00 |

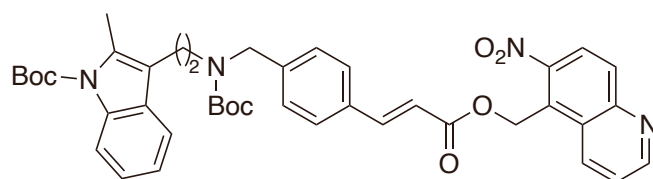

*N,N*-Di-Boc-*O*-((1-methyl-2-nitroimidazol-5-yl)methyl)-panobinostat

EC5-06

12/11/2018

Acquisition Method Purity short run @254 nm with long hold  
 Acquisition Date/Time 12/11/2018 2:40 pm  
 Injection Volume 10  
 Sample Name EC5-06  
 Sample Description  
 Batch Description

EC5-06 : Injection 1

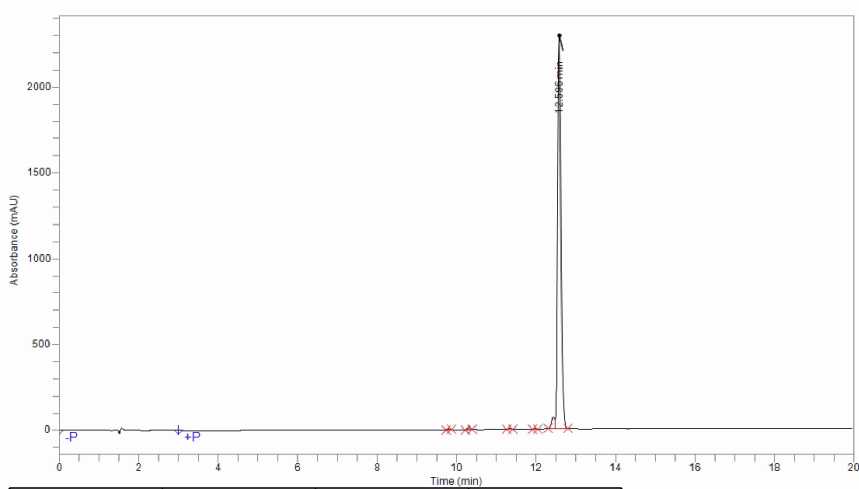

| Time         | Height      | Area         | Area % |
|--------------|-------------|--------------|--------|
| 9.809        | 5,860.4     | 23,457.5     | 0.18   |
| 10.319       | 16,539.6    | 69,084.1     | 0.54   |
| 11.351       | 5,998.6     | 25,916.7     | 0.20   |
| 11.990       | 3,952.6     | 15,955.0     | 0.12   |
| 12.440       | 68,462.0    | 327,459.7    | 2.54   |
| 12.596       | 2,293,450.6 | 12,416,674.7 | 96.41  |
| <b>Total</b> |             | 12,878,547.7 | 100.00 |

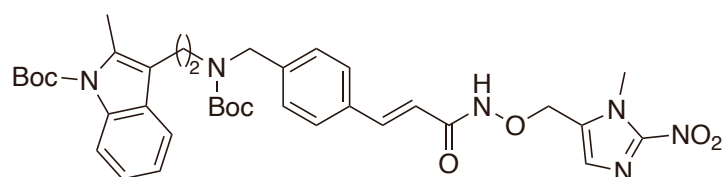



*O*-Benzyl-panobinostat (Bn-Pano, **10**)

EC5-03

11/15/2018

Acquisition Method Purity short run @254 nm  
Acquisition Date/Time 11/15/2018 10:41 am  
Injection Volume 10  
Sample Name EC5-03  
Sample Description  
Batch Description

EC5-03 : Injection 1

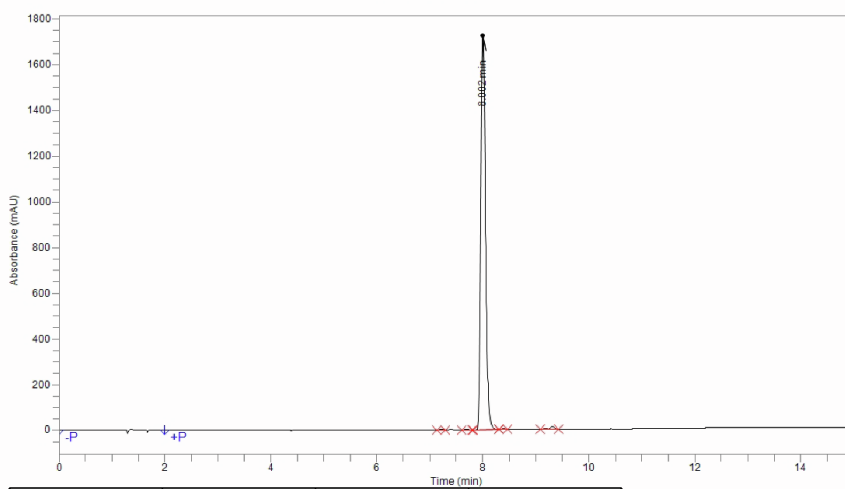

| Time  | Height      | Area         | Area % |
|-------|-------------|--------------|--------|
| 7.223 | 3,653.0     | 16,559.7     | 0.16   |
| 7.696 | 3,057.3     | 14,995.5     | 0.14   |
| 8.002 | 1,727,141.3 | 10,237,501.0 | 98.80  |
| 8.393 | 4,153.3     | 17,709.5     | 0.17   |
| 9.185 | 3,472.0     | 16,907.9     | 0.16   |
| 9.317 | 11,731.4    | 58,166.0     | 0.56   |
| Total |             | 10,361,839.6 | 100.00 |

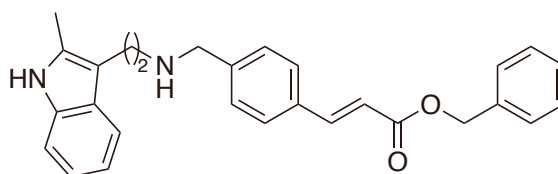

*O*-(4-Nitrobenzyl)-panobinostat trifluoroacetate (NB-Pano, **11**)

EC2-18

Purity short run @254 nm

11/4/2016 3:54 pm

Sample Name EC2-18  
Vial Number 3  
Injection Volume 20  
Acquisition Date/Time 11/4/2016 1:24 pm  
Acquisition Method Purity short run @254 nm  
Processing Method Purity short run @254 nm

EC2-18 : Injection 1

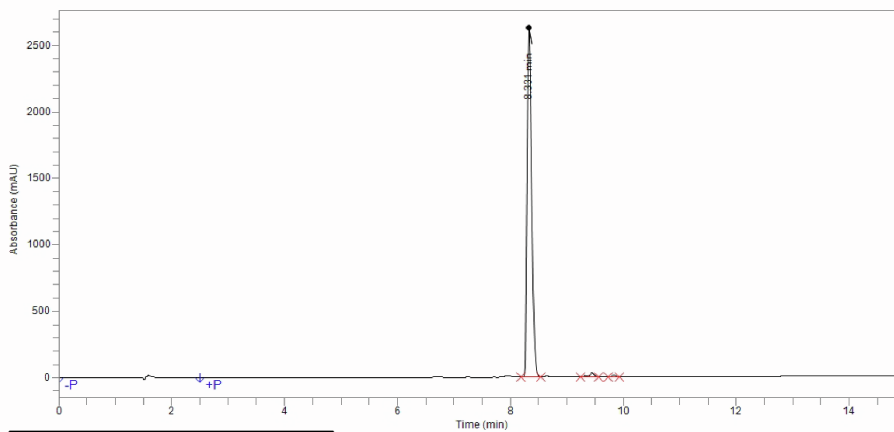

| Time         | Area                | Area %        |
|--------------|---------------------|---------------|
| 8.331        | 14,908,280.8        | 98.07         |
| 9.321        | 49,133.2            | 0.32          |
| 9.444        | 168,073.8           | 1.11          |
| 9.829        | 76,090.2            | 0.50          |
| <b>Total</b> | <b>15,201,577.9</b> | <b>100.00</b> |

11/4/2016 3:54 pm

Flexar HPLC 2

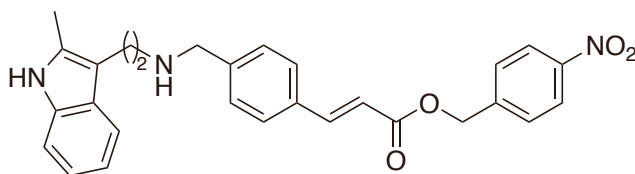

*O*-(5-Nitrothiophen-2-yl)methyl))-panobinostat trifluoroacetate (NT-Pano, **12**)

EC2-37

Purity short run @254 nm

1/11/2017 2:40 pm

Sample Name EC2-37  
Vial Number 1  
Injection Volume 10  
Acquisition Date/Time 1/11/2017 2:22 pm  
Acquisition Method Purity short run @254 nm  
Processing Method Purity short run @254 nm

EC2-37 : Injection 1

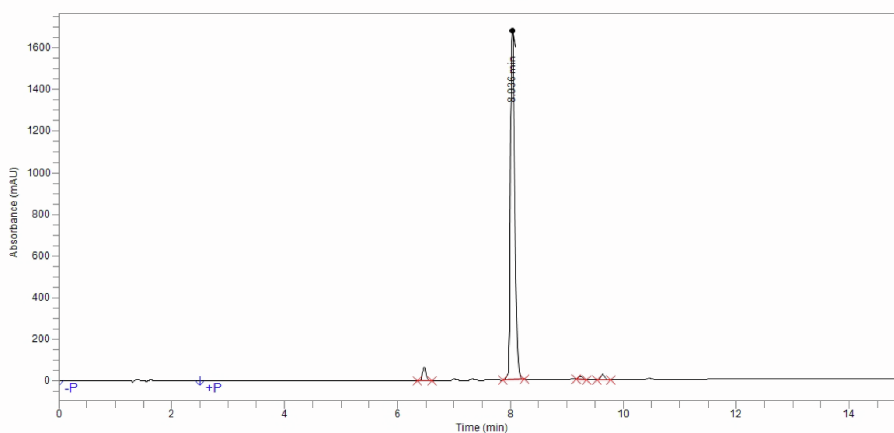

| Time         | Area               | Area %        |
|--------------|--------------------|---------------|
| 6.474        | 267,632.6          | 2.77          |
| 8.036        | 9,169,783.6        | 95.06         |
| 9.237        | 76,595.7           | 0.79          |
| 9.635        | 132,733.0          | 1.38          |
| <b>Total</b> | <b>9,646,744.8</b> | <b>100.00</b> |

1/11/2017 2:40 pm

Flexar HPLC 2

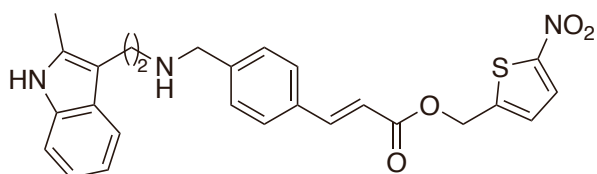

*O*-(6-Nitroquinolin-5-ylmethyl))-panobinostat di-trifluoroacetate (NQ-Pano, **13**)

EC3-91

1/4/2019

Acquisition Method Purity short run @254 nm  
 Acquisition Date/Time 1/10/2018 12:56 pm  
 Injection Volume 10  
 Sample Name EC3-91  
 Sample Description  
 Batch Description EC

EC3-91 : Injection 1

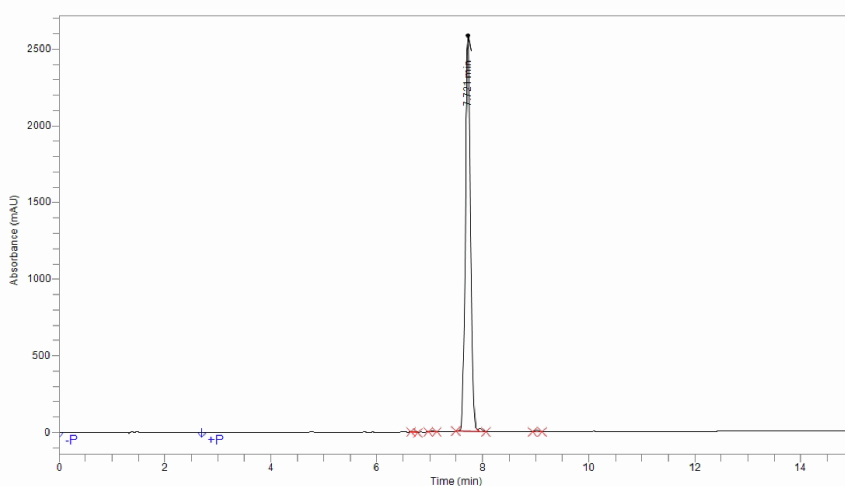

| Time         | Height      | Area         | Area % |
|--------------|-------------|--------------|--------|
| 6.703        | 5,278.4     | 22,946.9     | 0.13   |
| 7.053        | 5,771.8     | 27,979.5     | 0.16   |
| 7.721        | 2,585,241.8 | 17,486,575.7 | 98.82  |
| 7.952        | 20,853.4    | 105,450.1    | 0.60   |
| 9.023        | 10,176.2    | 52,548.6     | 0.30   |
| <b>Total</b> |             | 17,695,500.7 | 100.00 |

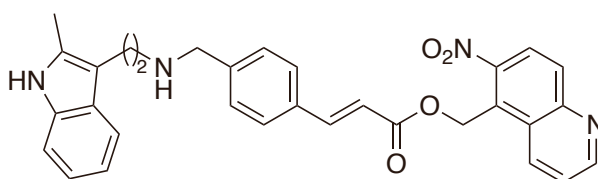

*N,N*-Di-Boc-panobinostat (**14**)

EC4-42 +TFA

1/4/2019

Acquisition Method Purity short run @254 nm  
 Acquisition Date/Time 1/4/2019 11:13 am  
 Injection Volume 10  
 Sample Name EC4-42 +TFA  
 Sample Description  
 Batch Description

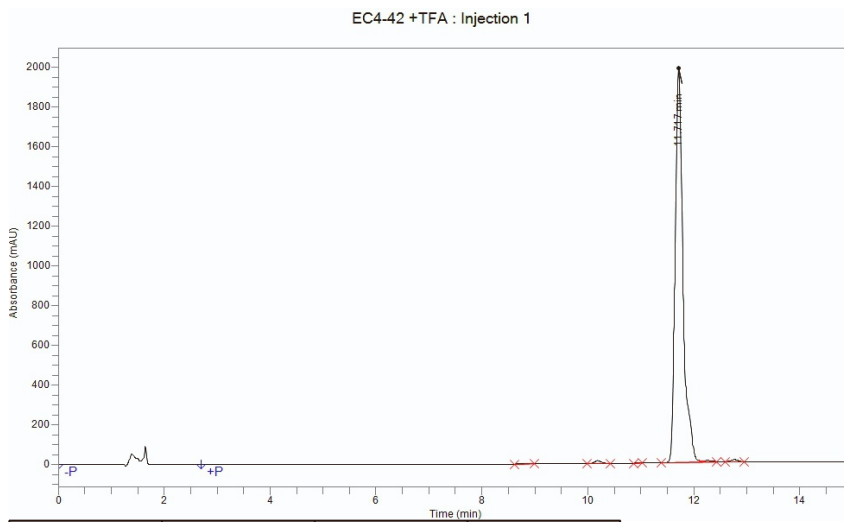

| Time         | Height      | Area         | Area % |
|--------------|-------------|--------------|--------|
| 8.752        | 3,563.8     | 31,672.7     | 0.15   |
| 10.185       | 14,619.4    | 115,771.7    | 0.57   |
| 11.006       | 193.5       | 1,350.5      | 0.01   |
| 11.717       | 1,986,041.2 | 20,146,471.9 | 98.52  |
| 12.264       | 5,418.6     | 54,861.0     | 0.27   |
| 12.770       | 11,253.5    | 97,984.8     | 0.48   |
| <b>Total</b> |             | 20,448,112.5 | 100.00 |

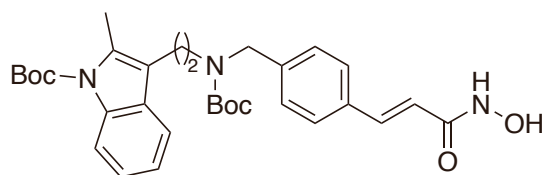

O-((1-Methyl-2-nitroimidazol-5-yl)methyl)-Panobinostat di-trifluoroacetate (CH-03, NI-Pano, 1)

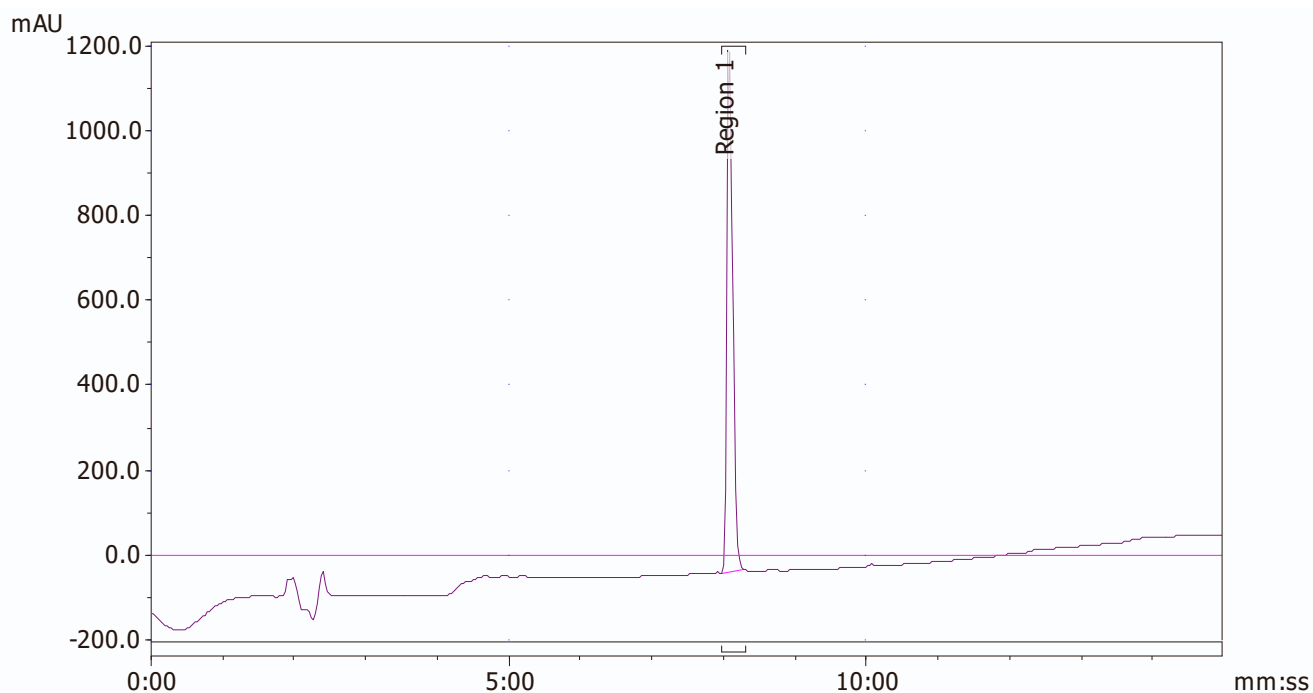

Regions: DA-C@220nm Detector:

| Name     | Start<br>(mm:ss) | End<br>(mm:ss) | Retention<br>(mm:ss) | Area<br>(mAU·s) | %ROI<br>(%) | %Total<br>(%) |
|----------|------------------|----------------|----------------------|-----------------|-------------|---------------|
| Region 1 | 7:58             | 8:18           | 8:04                 | 6361.4          | 100.00      | N/A           |
| 1 Peak   |                  |                |                      | 6361.4          | 100.00      | N/A           |

Total Area: -33335.6 mAU  
Average Background: N/A mAU

Method: Xbridge\_nonRadio\_default

Instrument: N/A Serial no FR1A/0217/389

Run Length: 15m

Dwell: 1s

Cell Volume: 10 µL

Cell Type: Solid

Eluate Flow: 1.00 mL/min

Residence Time: 0.6s

Injection Volume: 10 µL

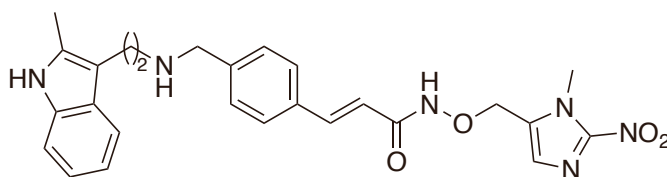

O-((1-Methyl-2-nitroimidazol-5-yl)methyl)-Panobinostat di-trifluoroacetate (CH-03, NI-Pano, 1)

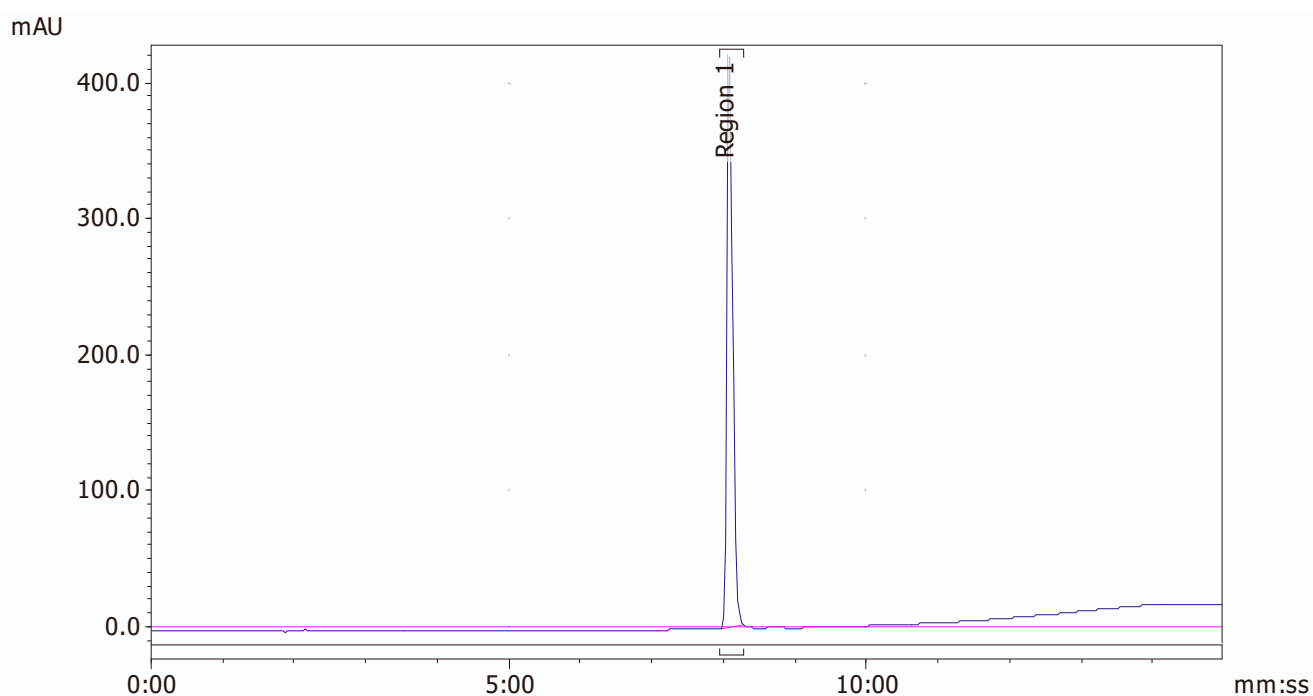

Regions: DA-B@254nm Detector:

| Name     | Start<br>(mm:ss) | End<br>(mm:ss) | Retention<br>(mm:ss) | Area<br>(mAU·s) | %ROI<br>(%) | %Total<br>(%) |
|----------|------------------|----------------|----------------------|-----------------|-------------|---------------|
| Region 1 | 7:57             | 8:16           | 8:04                 | 2147.8          | 100.00      | 62.27         |
| 1 Peak   |                  |                |                      | 2147.8          | 100.00      | 62.27         |

Total Area: 3448.9 mAU  
Average Background: N/A mAU

Method: Xbridge nonRadio default

Instrument: N/A Serial no FR1A/0217/389

Run Length: 15m

Dwell: 1s

Cell Volume: 10 µL

Cell Type: Solid

Eluate Flow: 1.00 mL/min

Residence Time: 0.6s

Injection Volume: 10 µL

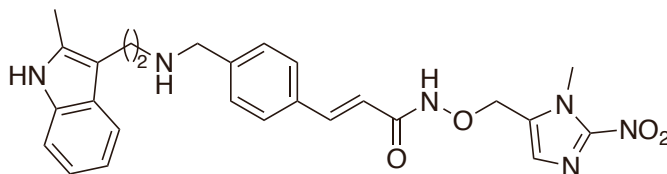

O-((1-Methyl-2-nitroimidazol-5-yl)methyl)-Panobinostat di-trifluoroacetate (CH-03, NI-Pano, 1)

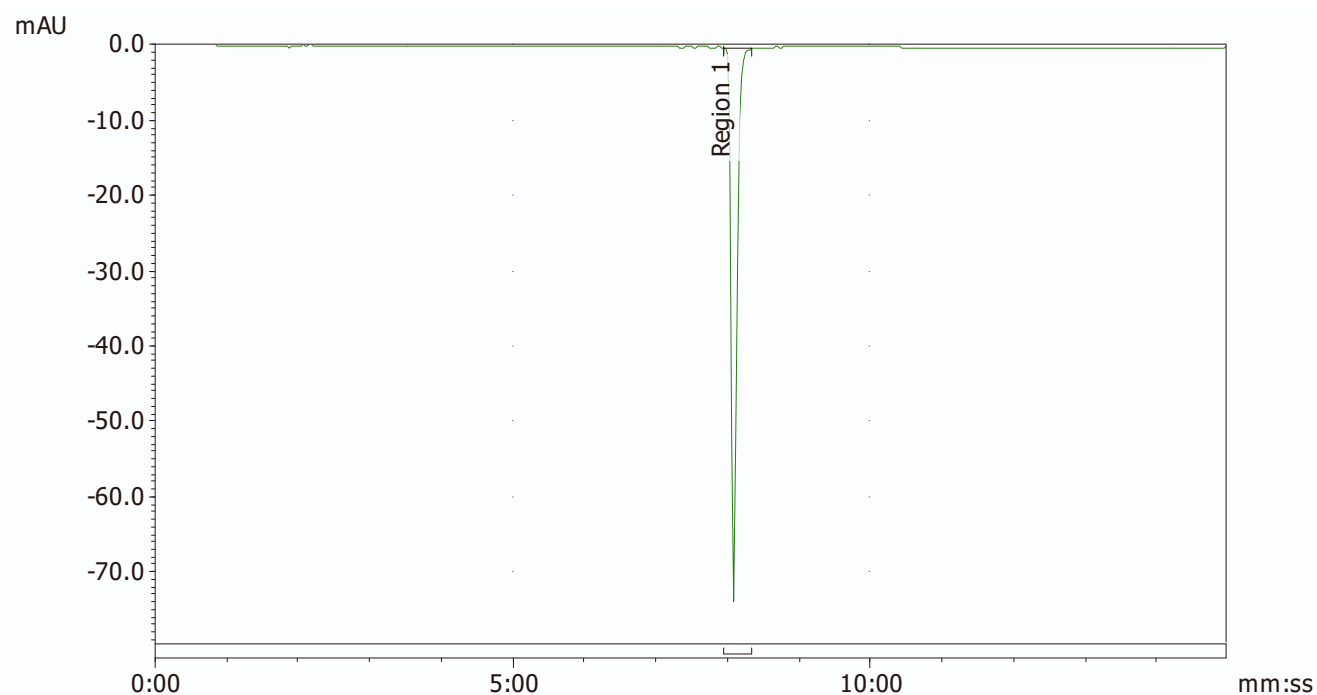

Regions: DA-D@365nm Detector:

| Name     | Start (mm:ss) | End (mm:ss) | Retention (mm:ss) | Area (mAU·s) | %ROI (%) | %Total (%) |
|----------|---------------|-------------|-------------------|--------------|----------|------------|
| Region 1 | 7:57          | 8:20        | 7:57              | -400.8       |          | N/A        |
| 1 Peak   |               |             |                   | -400.8       | 100.00   | N/A        |

Total Area: -635.4 mAU

Average Background: N/A mAU

Method: Xbridge nonRadio default

Instrument: N/A Serial no FR1A/0217/389

Run Length: 15m

Dwell: 1s

Cell Volume: 10 µL

Cell Type: Solid

Eluate Flow: 1.00 mL/min

Residence Time: 0.6s

Injection Volume: 10 µL

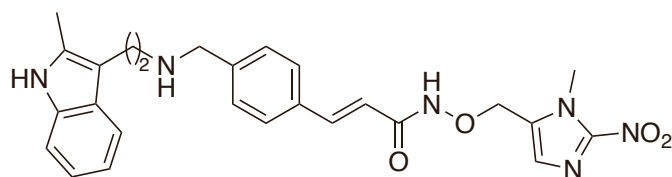



(*E*)-3-(4-[[2-(2-Methyl-1*H*-indol-3-yl)ethylamino]methyl]phenyl)prop-2-enoic acid trifluoroacetate (**S18**)

EC5-05

11/15/2018

Acquisition Method Purity short run @254 nm  
Acquisition Date/Time 11/13/2018 5:31 pm  
Injection Volume 10  
Sample Name EC5-05  
Sample Description  
Batch Description

EC5-05 : Injection 1

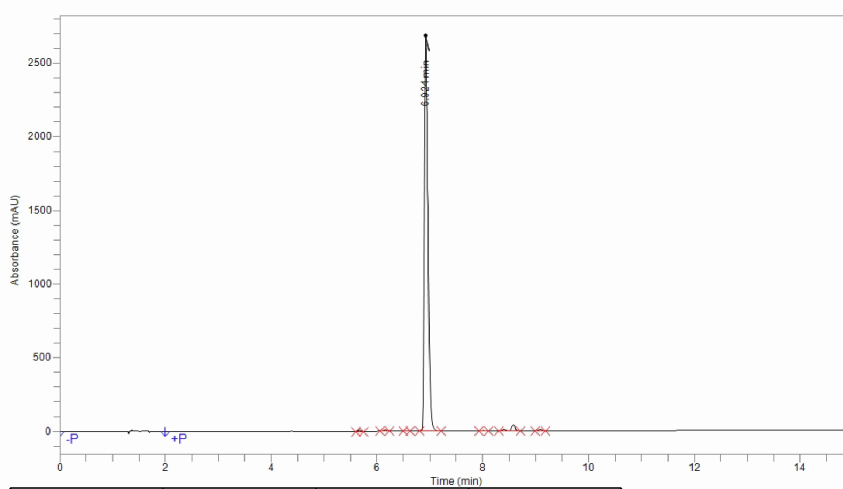

| Time  | Height      | Area         | Area % |
|-------|-------------|--------------|--------|
| 5.666 | 7,378.7     | 24,641.2     | 0.18   |
| 6.151 | 12,629.0    | 48,704.8     | 0.35   |
| 6.560 | 4,172.3     | 14,854.3     | 0.11   |
| 6.924 | 2,689,301.6 | 13,536,942.6 | 96.97  |
| 8.011 | 4,110.7     | 19,689.0     | 0.14   |
| 8.397 | 12,240.3    | 59,987.8     | 0.43   |
| 8.578 | 41,434.1    | 197,179.3    | 1.41   |
| 9.088 | 12,533.8    | 57,532.1     | 0.41   |
| Total |             | 13,959,531.1 | 100.00 |

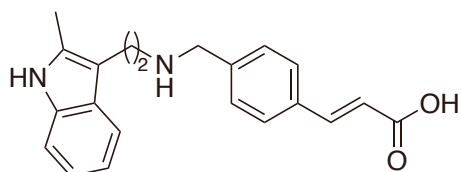

(E)-2-(2-(4-((1-Methyl-2-nitro-1H-imidazol-5-yl)methoxy)styryl)-4H-chromen-4-ylidene)malononitrile

Acquisition Method Purity short run @254 nm  
Acquisition Date/Time 1/15/2021 12:40 pm  
Injection Volume 10  
Sample Name MLOx120  
Sample Description  
Batch Description

MLOx120 : Injection 1

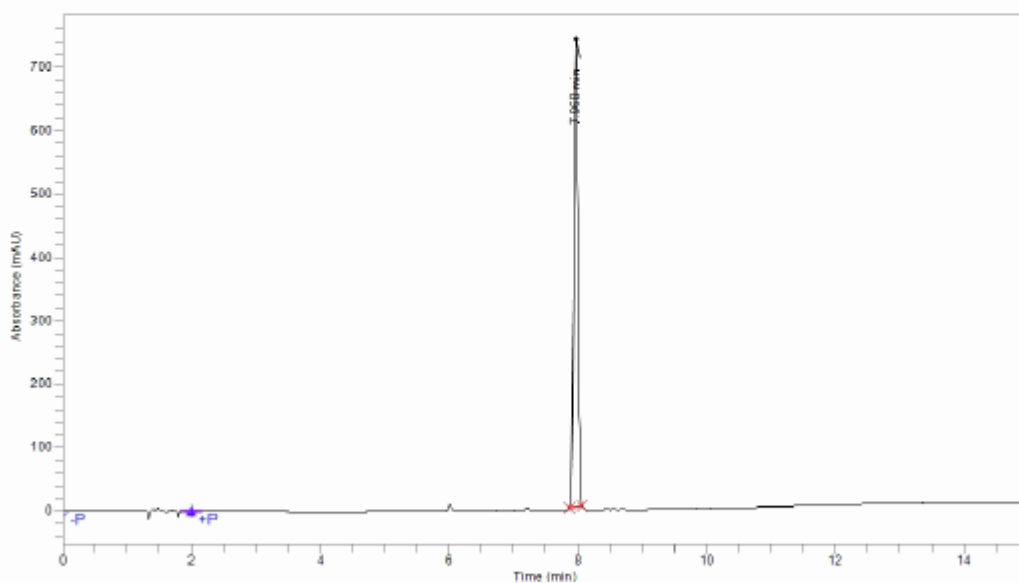

| Time  | Height    | Area        | Area % |
|-------|-----------|-------------|--------|
| 7.968 | 738,461.0 | 3,213,778.3 | 100.00 |
| Total |           | 3,213,778.3 | 100.00 |

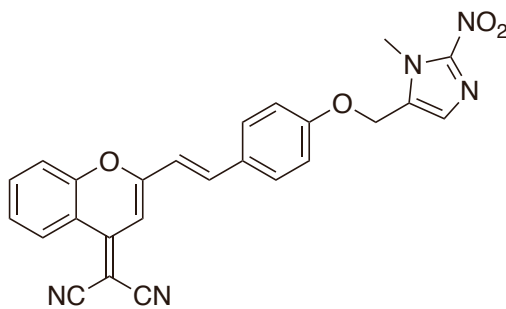

Supplement: mmc1 [file mmc1.pdf]
